# Supplementary material
Source: PubMed Central journal article supplement (PMC6649154)
Supplement: ao9b00058_si_001.pdf [file ao9b00058_si_001.pdf]

## Supporting information

### Editorial

#### Glancing back at a Successful 2018 and Looking Ahead to the New Year: our Tribute to ACS *Omega's* Authors, Editors, and Reviewers

Krishna N. Ganesh<sup>#</sup>, Deqing Zhang<sup>#</sup>

(<sup>#</sup>Co-Editor)

**Supplementary Table S1: Reviewer List.** Alphabetical list of ACS *Omega* peer reviewers who returned a referee report between January 1, 2018, and December 31, 2018.

| First            | Middle | Last name   |
|------------------|--------|-------------|
| Riina            |        | Aav         |
| Sara             |        | Abalde-Cela |
| Mohamed          |        | Abarbri     |
| Ander            |        | Abarrategi  |
| Amirali          |        | Abbasi      |
| Sergio           |        | Abbate      |
| Steven           |        | Abbott      |
| Khairul Bariyyah |        | Abd Halim   |
| Hitoshi          |        | Abe         |
| Tiffany          |        | Abitbol     |
| Andy             |        | Abott       |
| Ali              |        | Abou-Hassan |
| Fareed           |        | Aboul-ela   |
| Graciela         | C.     | Abuin       |
| Raed             |        | Abu-Reziq   |
| Nursel           |        | Acar        |
| Orlando          |        | Acevedo     |
| Somobrata        |        | Acharya     |
| K. Ravi          |        | Acharya     |
| Atanu            |        | Acharya     |
| Sylvain          |        | Achelle     |
| Dimitris         | S.     | Achilias    |
| Robert           | G.     | Acres       |
| Chihaya          |        | Adachi      |
| Dave             | J.     | Adams       |
| Dave J.          |        | Adams       |
| Mike             |        | Adams       |
| Oluwasesan       |        | Adegoke     |
| Ramkrishna       |        | Adhikary    |
| Christian        |        | Adlhart     |
| Sergey           | A.     | Adonin      |
| Alex             |        | Adronov     |
| Nesrine          |        | Affara      |

|                |        |              |
|----------------|--------|--------------|
| Amit           |        | Agarwal      |
| Sarit          | S.     | Agasti       |
| Mark           |        | Agostino     |
| Janaina I. S.  |        | Aguiar       |
| Marcel         |        | Aguilella    |
| Basir          |        | Ahmad        |
| Rashid         |        | Ahmad        |
| M.             |        | Ahmaruzzaman |
| Qazi           | Naveed | Ahmed        |
| Shakeel        |        | Ahmed        |
| Rasha          | A.     | Ahmed        |
| Nisar          |        | Ahmed        |
| Vefa           |        | Ahsen        |
| Hua            |        | Ai           |
| Lunhong        |        | Ai           |
| Shiyun         |        | Ai           |
| Misako         |        | Aida         |
| David          |        | Aili         |
| Alfredo        |        | Aires        |
| Cristina       |        | Airoldi      |
| Karim          |        | Aissou       |
| Javier         |        | Aizpurua     |
| Ayyappanpillai |        | Ajayaghosh   |
| T. A.          |        | Ajith        |
| Krishnacharya  | G.     | Akamanchi    |
| Takeshi        |        | Akasaka      |
| Esin           |        | Aki-Yalcin   |
| V'yacheslav    |        | Akerman      |
| Senem          |        | Akkoç        |
| Nahit          |        | Aktaş        |
| Tomoyuki       |        | Akutagawa    |
| Igor           | V.     | Alabugin     |
| Emilio         | I.     | Alarcon      |
| Saman          |        | Alavi        |
| Bauke          |        | Albada       |
| Aline          |        | Alberti      |
| Martin         |        | Albrecht     |
| Thomas         | A.     | Albright     |
| Luis J.        |        | Aleman       |
| Travis         | Robert | Alexander    |
| W.             | Russ   | Algar        |
| Saeed          | M.     | Alhassan     |
| Mahammad       |        | Ali          |
| Imtiaz         |        | Ali          |
| Akrajas        |        | Ali Umar     |
| Alexander      |        | Alijah       |
| Mohamed        | H.     | Alkordi      |
| Ibon           |        | Alkorta      |

|                 |         |                       |
|-----------------|---------|-----------------------|
| Jürgen          |         | Allgaier              |
| Thomas          |         | Allmendinger          |
| Joachim         |         | Allouche              |
| Mansour         | H.      | Almatarneh            |
| Abdullah        |         | Al-Mayouf             |
| Adah            |         | Almutairi             |
| Francisco       |         | Alonso                |
| Helmut          | G.      | Alt                   |
| Thomas          |         | Altantzis             |
| Ammar           | Badran  | Al-Temimi             |
| Eric            | I.      | Altman                |
| James           |         | Aluha                 |
| Keith           |         | Alvares               |
| Luis            |         | Álvarez de Cienfuegos |
| Juan Raul       |         | Alvarez-Idaboy        |
| Ramon           | A.      | Alvarez-Puebla        |
| Wendel          | Andrade | Alves                 |
| Ali Mohammad    |         | Amani                 |
| Massoud         |         | Amanlou               |
| Giovanni Wilson |         | Amarante              |
| Rommie          | E.      | Amaro                 |
| Alberto         |         | Ambrosetti            |
| Shigeru         |         | Amemiya               |
| Abderrahmane    |         | Amgoune               |
| Tejraj M.       |         | Aminabhavi            |
| Maximilian      |         | Amsler                |
| Changhua        |         | An                    |
| Hongjie         |         | An                    |
| Vladimir        |         | An                    |
| Megha           |         | Anand                 |
| Valentine       | P.      | Ananikov              |
| Ganapathi       |         | Anantharaman          |
| G.              |         | Anbalagan             |
| Niels           | H.      | Andersen              |
| Harry           | L.      | Anderson              |
| Nicholas        | C.      | Anderson              |
| Martin          | Peter   | Andersson             |
| Romulo          | A.      | Ando                  |
| Shinji          |         | Ando                  |
| Peter           | R.      | Andreana              |
| Silvana         |         | Andreescu             |
| Patrizia        |         | Andreoizzi            |
| Nirmala         | Grace   | Andrews               |
| Marius          |         | Andruh                |
| Laura           |         | Anfossi               |
| Paula           | C.      | Angelomé              |
| Goran           |         | Angelovski            |
| Narcis          |         | Anghel                |

|                |        |                |
|----------------|--------|----------------|
| Mohammad       | Omaish | Ansari         |
| Mohammad Imran |        | Ansari         |
| Alejandro      |        | Ansón-Casaos   |
| Edward         | John   | Anthony        |
| John           | E.     | Anthony        |
| Markus         |        | Antonietti     |
| Svetlana       | V.     | Antonyuk       |
| Reiner         |        | Anwander       |
| Yanhui         |        | Ao             |
| Zhimin         |        | Ao             |
| Idalina        | V.     | Aoki           |
| Takao          |        | Aoyagi         |
| Cuvas          |        | Apan           |
| Allen          | W.     | Aplett         |
| Antonio        |        | Apicella       |
| Aaron          |        | Aponick        |
| Adelia         | J. A.  | Aquino         |
| Johan          |        | Åqvist         |
| David          |        | Aradilla       |
| Fermin         | H.     | Aragon         |
| Kenji          |        | Arakawa        |
| Toshiyuki      |        | Araki          |
| Amir           |        | Arasteh        |
| Vanchiappan    |        | Aravindan      |
| Oscar          |        | Arce-Cervantes |
| Abdolreza      |        | Ardeshiryajimi |
| Francesco      |        | Arena          |
| Narshinha      | P.     | Argade         |
| Christopher    | G.     | Arges          |
| Katsuhiko      |        | Ariga          |
| Sean           |        | Arlauckas      |
| Sanja          | J.     | Armaković      |
| Marc           |        | Armbruster     |
| Peter B.       |        | Armentrout     |
| Bruce          | Alan   | Armitage       |
| Luis           | G.     | Arnaut         |
| Omotayo        | A.     | Arotiba        |
| Antonio        |        | Arques         |
| Silvia         |        | Arrese-Igor    |
| Damien         | W. M.  | Arrigan        |
| Rossella       |        | Arrigo         |
| Frank          |        | Arroyave       |
| Manuel         |        | Arruebo        |
| Stellios       |        | Arseniyadis    |
| Mohammad       |        | Arshadi        |
| Elangannan     |        | Arunan         |
| Dev            | Priya  | Arya           |
| Gaurav         |        | Arya           |

|                  |         |                 |
|------------------|---------|-----------------|
| Elham            |         | Asadian         |
| Kohta            |         | Asano           |
| Tewodros         |         | Asefa           |
| Hitoshi          |         | Ashida          |
| Muthupandian     |         | Ashokkumar      |
| Alexis           |         | Aspee           |
| Craig            | Alan    | Aspinwall       |
| Didier           |         | Astruc          |
| Leonard          |         | Atanase         |
| Mihail           |         | Atanasov        |
| Necip            |         | Atar            |
| Raji             |         | Atchudan        |
| A. K. M.         |         | Atique Ullah    |
| Nour             |         | Attia           |
| Daniel           |         | Attinger        |
| Marc             | Gordon  | Aucoin          |
| Donald           | H.      | Aue             |
| Vidya            |         | Avasare         |
| Duygu            |         | Avci            |
| Maxim            |         | Avdeev          |
| Viktorya         |         | Aviyente        |
| Ahmet            |         | Avsar           |
| Mohamad          | M.      | Ayad            |
| Paul             | Woodson | Ayers           |
| Najmedin         |         | Azizi           |
| Saeid            |         | Azizian         |
| Praveen          |         | B. Mokshanatha  |
| Maria            | V.      | Babak           |
| Sofia            |         | Babnova         |
| Bathini Nagendra |         | Babu            |
| Robert           |         | Bach            |
| Belén            |         | Bachiller-Baeza |
| Claudia          |         | Backes          |
| John             | V.      | Badding         |
| Ildiko           |         | Badea           |
| Euiwon           |         | Bae             |
| Daniel           |         | Baecker         |
| Subhendu         | Sekhar  | Bag             |
| Santanu          |         | Bag             |
| Vincenzo         |         | Baglio          |
| Dhirendra        |         | Bahadur         |
| Pratap           |         | Bahadur         |
| Guoyi            |         | Bai             |
| Peng             |         | Bai             |
| Tongchun         |         | Bai             |
| Xianglan         |         | Bai             |
| Colin            | D.      | Bain            |
| Hari             | Chand   | Bajaj           |

|                     |       |                 |
|---------------------|-------|-----------------|
| Snezhana            | M.    | Bakalova        |
| Imre                |       | Bako            |
| Rajaram             |       | Bal             |
| Wojciech            |       | Bal             |
| V.                  |       | Balachandran    |
| S.                  |       | Balasubramanian |
| Maciej              |       | Balawejder      |
| Milan               |       | Balaz           |
| Peter               |       | Balàž           |
| Perla               | B.    | Balbuena        |
| Alan                | L.    | Balch           |
| Kim                 | K.    | Baldrige        |
| Andrea              |       | Balducci        |
| Daniel              | A.    | Balikov         |
| Matthias            |       | Ballauff        |
| Nirmalya            |       | Ballav          |
| Pedro               | J.    | Ballester       |
| Praveen Kumar       |       | Balne           |
| Rakeshwar           |       | Bandichhor      |
| Priyanka Vishvanath |       | Bandivadekar    |
| Shunji              |       | Bandow          |
| Dipankar            |       | Bandyopadhyay   |
| Pradipta            |       | Bandyopadhyay   |
| Subhajit            |       | Bandyopadhyay   |
| Susan               | L.    | Bane            |
| Priyanka            |       | Banerjee        |
| Arindam             |       | Banerjee        |
| Rahul               |       | Banerjee        |
| Rajat               |       | Banerjee        |
| Tamal               |       | Banerjee        |
| Shibdas             |       | Banerjee        |
| Priyabrata          |       | Banerjee        |
| Sarbajit            |       | Banerjee        |
| Subrata             |       | Banik           |
| Tamas               |       | Bansagi         |
| Christina           | N.    | Banti           |
| Martin              | G.    | Banwell         |
| Ming                |       | Bao             |
| Shu-Juan            |       | Bao             |
| Xichang             |       | Bao             |
| Junwei              | Lucas | Bao             |
| Maurício            | S.    | Baptista        |
| Talat               |       | Baran           |
| Ajay Kumar          | Kumar | Baranwal        |
| Joana               | F. B. | Barata          |
| Ali                 |       | Barati          |
| Nadia               |       | Barbero         |
| Grégory             |       | Barbillon       |

|                |           |                 |
|----------------|-----------|-----------------|
| Luiz           | C. A.     | Barbosa         |
| Stephan        |           | Barcikowski     |
| Casey          |           | Barickman       |
| Stephen        | J.        | Barigye         |
| Jitender       |           | Bariwal         |
| Ishan          |           | Barman          |
| Panagiotis     |           | Barmpalexis     |
| Amy            | M.        | Barrios         |
| Amnon          |           | Bar-Shir        |
| Ritu           |           | Barthwal        |
| Jonathan       | K.        | Bartley         |
| Martin         |           | Bartosik        |
| Jubaraj        | B.        | Baruah          |
| Hernane        | da Silva  | Barud           |
| Dinesh         | Kumar     | Barupal         |
| Gleb           | V.        | Baryshnikov     |
| Andreea        | Irina     | Barzic          |
| Lourdes        |           | Basabe-Desmonts |
| Amit           |           | Basak           |
| Devii          |           | Basavaiah       |
| Rashid         |           | Bashir          |
| Nuno           |           | Basílio         |
| Abdul W.       |           | Basit           |
| Olivier        |           | Baslé           |
| Dario          | M.        | Bassani         |
| Turgut         |           | Bastug          |
| Neus           | G.        | Bastús          |
| Basudeb        |           | Basu            |
| Suddhasatwa    |           | Basu            |
| Sudipta        |           | Basu            |
| Augusto        |           | Batagin-Neto    |
| Roderick       | Wayland   | Bates           |
| Andrei         | S.        | Batsanov        |
| Peter          |           | Bäuerle         |
| Jean-Sébastien |           | Baumann         |
| Sayan          |           | Bayan           |
| Ilker          | S.        | Bayer           |
| Ayoob          |           | Bazgir          |
| Denis          |           | Bazhin          |
| Martina        |           | Bazzaro         |
| Marco          |           | Beaumont        |
| Roy            |           | Beck            |
| Donald         | Frederick | Becker          |
| Frédéric       |           | Becq            |
| Emiliano       |           | Bedini          |
| Artur          |           | Bednarkiewicz   |
| Andrew         | Michael   | Beekman         |
| Andrew         | A.        | Beharry         |

|                |         |                 |
|----------------|---------|-----------------|
| Ehsan          |         | Behazin         |
| Mohammad       |         | Behbahani       |
| Uwe            |         | Beifuss         |
| Olcay          |         | Bekircan        |
| Kevin          | D.      | Belfield        |
| Federica       |         | Belluti         |
| Arij           |         | Ben Amara       |
| Abderrahmane   |         | Benchirouf      |
| Jesper         |         | Bendix          |
| James          | M.      | Benevides       |
| Rossella       |         | Bengalli        |
| Jitendra       | K.      | Bera            |
| Gregory        | J. O.   | Beran           |
| Christian      |         | Berens          |
| Igor           | N.      | Berezovsky      |
| Fernando       |         | Bergasa-Caceres |
| David          | E.      | Bergbreiter     |
| Raphael        | J. F.   | Berger          |
| Jotam          |         | Bergfreund      |
| Jan            |         | Bergman         |
| Philippe       |         | Bergonzo        |
| Julián         |         | Bergueiro       |
| Luca           |         | Bernardi        |
| Christian      |         | Bernhard        |
| Stefan         |         | Bernhard        |
| Lawrence R     |         | Bernstein       |
| Ronnie         | P.-A.   | Berntsson       |
| Jean-François  |         | Berret          |
| Debora         |         | Berti           |
| Mauro          |         | Bertotti        |
| Giorgio        |         | Besagni         |
| Emili          |         | Besalu          |
| Pol            |         | Besenius        |
| Marija         |         | Bester-Rogac    |
| Eriola         |         | Betiku          |
| Igor           |         | Bezverkhyy      |
| Avinash        |         | Bhadani         |
| Bhalchandra M. |         | Bhanage         |
| Bhavesh        |         | Bharatiya       |
| Ramakrishna    | G.      | Bhat            |
| Dhiraj         | Devidas | Bhatia          |
| Chet           |         | Bhatt           |
| Pratip         | K.      | Bhattacharya    |
| Kankan         |         | Bhattacharyya   |
| Aninda J.      |         | Bhattacharyya   |
| Sudeep         |         | Bhattacharyya   |
| Asim           |         | Bhaumik         |
| China Raju     |         | Bhimapaka       |



|             |               |             |
|-------------|---------------|-------------|
| Sidhanath   | V.            | Bhosale     |
| Kartick     | Chandra       | Bhowmick    |
| Somnath     |               | Bhowmick    |
| Yingpu      |               | Bi          |
| Lanrong     |               | Bi          |
| Marzena     |               | Białek      |
| Shaowei     |               | Bian        |
| Yongzhong   |               | Bian        |
| Zhenfeng    |               | Bian        |
| Zuqiang     |               | Bian        |
| F. Matthias |               | Bickelhaupt |
| Matthias    |               | Bickermann  |
| Mario       |               | Bieringer   |
| Jan         |               | Bieschke    |
| Andrea      |               | Biffis      |
| Giuseppe    |               | Bifulco     |
| Dimitrios   | N.            | Bikiaris    |
| Emiliano    |               | Bilotti     |
| Roberto     |               | Bini        |
| Christophe  |               | Biot        |
| Nick        |               | Birbilis    |
| Alexandru   | S.            | Biris       |
| Henrik      |               | Birkedal    |
| Dunbar      |               | Birnie      |
| Anthony     | C.            | Bishop      |
| Sibani Lisa |               | Biswal      |
| Aniket      |               | Biswas      |
| Koushik     |               | Biswas      |
| Johannes    | Hendrik       | Bitter      |
| Robert      |               | Bittl       |
| Richard     | S.            | Blackburn   |
| Ian         | S.            | Blagbrough  |
| James       | D.            | Blakemore   |
| Francisco   | J.            | Blanco      |
| Mark        | Arnold Thomas | Blaskovich  |
| Vladislav   | A.            | Blatov      |
| Julien      |               | Bloino      |
| Neil        | V.            | Blough      |
| Zheng       |               | Bo          |
| Sergio      |               | Bocchini    |
| Art         | D.            | Bochevarov  |
| Manfred     |               | Bochmann    |
| Marc        |               | Bockrath    |
| Michael     | R.            | Bockstaller |
| Gustavo     |               | Bodelon     |
| Enrico      |               | Bodo        |
| Frank       | M.            | Boeckler    |
| Volker      |               | Boehm       |

|              |          |               |
|--------------|----------|---------------|
| Arnold       | J.       | Boersma       |
| Klemen       |          | Bohinc        |
| Filippo      | S.       | Boi           |
| Edouard      |          | Boivin        |
| Pablo        | P.       | Boix          |
| Mariela      |          | Bollini       |
| Carsten      |          | Bolm          |
| Mikael       |          | Bols          |
| Paul         |          | Bommer        |
| Sergio       | Mauricio | Bonesi        |
| Oriane       |          | Bonhomme      |
| Mahyar       |          | Bonsaii       |
| Ramamoorthy  |          | Boomishankar  |
| Inci         |          | Bora          |
| Mercedes     |          | Boronat       |
| Victor       |          | Borovkov      |
| Santiago     | Andres   | Bortolato     |
| Carlo        | Augusto  | Bortolotti    |
| Michał       | Adam     | Borysiewicz   |
| Nicolas      | D.       | Boscher       |
| Suryasarathi |          | Bose          |
| Maurizio     |          | Botta         |
| Giovanni     |          | Bottari       |
| Giovanni     |          | Bottegoni     |
| Steven       | E.       | Bottle        |
| Boubekeur    |          | Boudine       |
| Petr         |          | Bouř          |
| Laurent      |          | Bouteiller    |
| Florian      |          | Bouville      |
| Ned          | B.       | Bowden        |
| Ben          | J.       | Boyd          |
| Cyrille      |          | Boyer         |
| Ben          |          | Bradshaw      |
| Antonio      | Luiz     | Braga         |
| Goutam       |          | Brahmachari   |
| Mark         | S.       | Braiman       |
| Luis         | C.       | Branco        |
| Izabella     |          | Brand         |
| Jan          | Gerit    | Brandenburg   |
| Alberto      |          | Brandi        |
| Agi          |          | Brandt-Talbot |
| Birgit       | M.       | Braune        |
| Pierre       |          | Braunstein    |
| Martin       |          | Brehm         |
| Rainer       |          | Breitling     |
| Manuel       |          | Brenes        |
| Anthony      |          | Brennan       |
| James        |          | Brenner       |

|             |         |                   |
|-------------|---------|-------------------|
| Fernando    |         | Bresme            |
| Stéphane    |         | Bressanelli       |
| Thomas      | F.      | Brewer            |
| Candice     |         | Bridge            |
| Marcello    |         | Brigante          |
| James       |         | Briggs            |
| F.          |         | Brinzoi           |
| Sergio      |         | Brochsztain       |
| Brian       | N.      | Brogdon           |
| Martin      |         | Bröring           |
| C.          |         | Brosseau          |
| Chris       |         | Brough            |
| Sylvain     |         | Broussy           |
| Alex        |         | Brown             |
| J.B.        |         | Brown             |
| Duncan      | L.      | Browne            |
| Neil        | C.      | Bruce             |
| Christian   |         | Bruneau           |
| Martin      | R.      | Bryce             |
| Michal      |         | Brylinski         |
| Weifeng     |         | Bu                |
| Xian-He     |         | Bu                |
| Yuxiang     |         | Bu                |
| Michael     | R.      | Buchmeiser        |
| Alexander   | K.      | Buell             |
| Francisco   |         | Bueso             |
| Peter       |         | Buglyo            |
| Naveen      |         | Bunekar           |
| Jean-Claude | Georges | Bunzli            |
| Philip      | C.      | Burcham           |
| Clemens     |         | Burda             |
| Daniel      | Lee     | Burden            |
| Filip       |         | Bures             |
| Thiago      | A. L.   | Burgo             |
| Peeter      |         | Burk              |
| Andrew      | D.      | Burrows           |
| Nicolai     |         | Burzlaff          |
| Mark        | Stuart  | Butler            |
| Enkhsaruul  |         | Byambajav         |
| Alicia      | K.      | Byrd              |
| Gilbert     |         | C. Walker         |
| Felipe      |         | Caballero-Briones |
| Horacio     |         | Cabral            |
| Eurico      | J.      | Cabrita           |
| Francesco   |         | Cacciola          |
| Ludovico    |         | Cademartiri       |
| Thomas M.   |         | Cahill            |
| Chun        |         | Cai               |

|           |         |                     |
|-----------|---------|---------------------|
| Weiwei    |         | Cai                 |
| Yue-Peng  |         | Cai                 |
| David     | R.      | Calabrese           |
| Monica    |         | Calatayud           |
| Gabriela  |         | Caldero             |
| Cesar     |         | Calero-Rubio        |
| Valeria   |         | Califano            |
| Carmen J. |         | Calzado             |
| Ana       |         | Camara-Artigas      |
| Pedro     | H. C.   | Camargo             |
| Jon       | P.      | Camden              |
| Jean-Marc |         | Campagne            |
| Marco     |         | Campetella          |
| Nuria     | E.      | Campillo            |
| Vanina A. |         | Campo               |
| Juan      |         | Campora             |
| Marcelo   | Mariano | Campos-Vallette     |
| Gabriele  |         | Candiani            |
| Luciano   |         | Canovese            |
| Laurent   |         | Cantrel             |
| Anmin     |         | Cao                 |
| Chong     |         | Cao                 |
| Derong    |         | Cao                 |
| Hua       |         | Cao                 |
| Jianyu    |         | Cao                 |
| Maosheng  |         | Cao                 |
| Xiao-Yu   |         | Cao                 |
| Zexing    |         | Cao                 |
| Guo-Jin   |         | Cao                 |
| Wei       |         | Cao                 |
| Xiaoyan   |         | Cao                 |
| Peng-Fei  |         | Cao                 |
| Renzhi    |         | Cao                 |
| Yingchun  |         | Cao                 |
| Rodrigo   | B.      | Capaz               |
| Jorge     |         | Carballido-Landeira |
| Paola     |         | Carbone             |
| Rita      |         | Cardoso Guedes      |
| Timothy   |         | Cardozo             |
| Marco     |         | Carminati           |
| Karina    |         | Carneiro            |
| Maria     | L.      | Carreon             |
| Moises    | A.      | Carreon             |
| Javier    |         | Carretero-Gonzalez  |
| Daniel    |         | Carriazo            |
| Luisa     |         | Carrillo            |
| Carolina  |         | Carrillo-Carrion    |
| Felix     | A.      | Carroll             |

|               |       |                   |
|---------------|-------|-------------------|
| Emily         | A.    | Carter            |
| Cristina      |       | Carucci           |
| Clara         |       | Casado-Coterillo  |
| Concepcion    |       | Cascales          |
| Daniela       |       | Caschera          |
| Luca          |       | Casettari         |
| Michael       | D.    | Casler            |
| Maytal        |       | Caspary Toroker   |
| Ramon         |       | Castañeda-Priego  |
| Pedro         |       | Castaño           |
| Valeria       |       | Castelletto       |
| Valter        |       | Castelvetro       |
| Jose L.       |       | Castillo          |
| Elizabeth     |       | Castillo-Martinez |
| Carlos        | E.    | Castro            |
| Miguel        |       | Castro-Martínez   |
| Tommaso       | R. I. | Cataldi           |
| Bernard       |       | Cathala           |
| Artur         |       | Cavaco-Paulo      |
| Simeon        |       | Cavadias          |
| Giuseppe      |       | Cavallaro         |
| Fabrizio      |       | Cavani            |
| Catherine     | S. J. | Cazin             |
| Alfonso       |       | Cebollada         |
| Juan Antonio  |       | Cecilia           |
| Deniz         |       | Cekmecelioglu     |
| Christian     |       | Celia             |
| Radovan       |       | Černý             |
| Pierfrancesco |       | Cerruti           |
| Jiri          |       | Cervenka          |
| Afsin Y.      |       | Cetinkaya         |
| Seung         | I.    | Cha               |
| Jin           | Kun   | Cha               |
| Vitaly        | V.    | Chaban            |
| Elodie        |       | Chabanon          |
| Michael       | L.    | Chabinyc          |
| Heeyeop       |       | Chae              |
| Keun Hwa      |       | Chae              |
| Bo            |       | Chai              |
| Fang          |       | Chai              |
| Jin-ling      |       | Chai              |
| Wen-Xiang     |       | Chai              |
| Yaqin         |       | Chai              |
| Sankar        |       | Chakma            |
| Gopal         |       | Chakrabarti       |
| Asit          | K.    | Chakraborti       |
| Brahmananda   |       | Chakraborty       |
| Harinath      |       | Chakrapani        |

|                    |          |                    |
|--------------------|----------|--------------------|
| Suman              |          | Chakravarti        |
| Wesley             | A.       | Chalifoux          |
| Philip             | Paul     | Chamberlain        |
| Philip             | Wai Hong | Chan               |
| Sunney             | I.       | Chan               |
| Jefferson          |          | Chan               |
| Munish             |          | Chanana            |
| Kaushik            |          | Chanda             |
| Rajesh             |          | Chandra            |
| Joya               |          | Chandra            |
| Subhas             |          | Chandra Pan        |
| K. V. G.           |          | Chandra Sekhar     |
| Gopalakrishnan     |          | Chandrasekaran     |
| Sriraam Ramanathan |          | Chandrasekaran     |
| Srivari            |          | Chandrasekhar      |
| Vadapalli          |          | Chandrasekhar      |
| K.                 |          | Chandrasekhara     |
| Fei                |          | Chang              |
| Jie                |          | Chang              |
| Junbiao            |          | Chang              |
| Liping             |          | Chang              |
| Dong Wook          |          | Chang              |
| Cheng              | Allen    | Chang              |
| Huan-Tsung         |          | Chang              |
| Meng-Yang          |          | Chang              |
| Shang-Tzen         |          | Chang              |
| Shoou-Jinn         |          | Chang              |
| Ting-Chang         |          | Chang              |
| Catherine C. Y.    |          | Chang              |
| Henri              |          | Chanzy             |
| Jian-Bin           |          | Chao               |
| Mingju             |          | Chao               |
| Mathias            |          | Charconnet         |
| Manop              |          | Charoenchaitrakool |
| Marian             |          | Chatenet           |
| Pratim             | Kumar    | Chattaraj          |
| Abhijit            |          | Chatterjee         |
| Kaushik            |          | Chatterjee         |
| Pabitra            | B.       | Chatterjee         |
| Sanghamitra        |          | Chatterjee         |
| Maya               |          | Chatterjee         |
| Dipankar           |          | Chatterji          |
| Arun               |          | Chattopadhyay      |
| Krishnananda       |          | Chattopadhyay      |
| Saptarshi          |          | Chattopadhyay      |
| Surya              |          | Chattopadhyaya     |
| Rajnish            | Kumar    | Chaturvedi         |
| Theodoros          | G.       | Chatzimitakos      |

|             |       |           |
|-------------|-------|-----------|
| Sandeep     |       | Chaudhary |
| Ghanshyam S |       | Chauhan   |
| Kalpana     |       | Chauhan   |
| H.          | M.    | Chawla    |
| Sheetal     |       | Chawla    |
| Defu        |       | Che       |
| Shunai      |       | Che       |
| Mohamed     | Mehdi | Chehimi   |
| Jeff        | Z. Y. | Chen      |
| Ailiang     |       | Chen      |
| Anwei       |       | Chen      |
| Baohua      |       | Chen      |
| Changlun    |       | Chen      |
| Chuan-Feng  |       | Chen      |
| Chuncheng   |       | Chen      |
| Chunying    |       | Chen      |
| Dezhi       |       | Chen      |
| Dingben     |       | Chen      |
| Gang        |       | Chen      |
| Gen         |       | Chen      |
| Guang       |       | Chen      |
| Guangming   |       | Chen      |
| Hailong     |       | Chen      |
| Hongmei     |       | Chen      |
| Hongsheng   |       | Chen      |
| Hui         |       | Chen      |
| Jiannan     |       | Chen      |
| Jianzhong   |       | Chen      |
| Jing        |       | Chen      |
| Jinyao      |       | Chen      |
| Keqiu       |       | Chen      |
| Li          |       | Chen      |
| Lidong      |       | Chen      |
| Ligong      |       | Chen      |
| Lingxin     |       | Chen      |
| Liwei       |       | Chen      |
| Min         |       | Chen      |
| Mingqing    |       | Chen      |
| Mingshu     |       | Chen      |
| Penglei     |       | Chen      |
| Pengpeng    |       | Chen      |
| Qi          |       | Chen      |
| Quan        |       | Chen      |
| Shiguo      |       | Chen      |
| Shui-Xia    |       | Chen      |
| Tao         |       | Chen      |
| Tao         |       | Chen      |
| Tian        |       | Chen      |

|            |       |      |
|------------|-------|------|
| Wanzhi     |       | Chen |
| Wei        |       | Chen |
| Wei        |       | Chen |
| Weihua     |       | Chen |
| Xia        |       | Chen |
| Xiang Ying |       | Chen |
| Xiao-Fang  |       | Chen |
| Xiaolang   |       | Chen |
| Xiaoqiang  |       | Chen |
| Xing-Qiu   |       | Chen |
| Xuesi      |       | Chen |
| Xueyuan    |       | Chen |
| Xuwei      |       | Chen |
| Yanhui     |       | Chen |
| Yao        |       | Chen |
| Yong       |       | Chen |
| Yong       |       | Chen |
| YongHua    |       | Chen |
| Yu         |       | Chen |
| Yu         |       | Chen |
| Yuanfu     |       | Chen |
| Yukun      |       | Chen |
| Yuncong    |       | Chen |
| Yunfeng    |       | Chen |
| Zhengbo    |       | Chen |
| Zhijun     |       | Chen |
| Zhiming    |       | Chen |
| Zhuo       |       | Chen |
| Zhuqi      |       | Chen |
| Sheng      |       | Chen |
| Wen-Hua    |       | Chen |
| Xue-Si     |       | Chen |
| Menglin    |       | Chen |
| Huixiong   |       | Chen |
| Zhongfang  |       | Chen |
| Zhong      |       | Chen |
| Chih-Kuang |       | Chen |
| Chih-Ming  |       | Chen |
| ChihPing   |       | Chen |
| Chinpan    |       | Chen |
| Chun-Hu    |       | Chen |
| Dong-Hwang |       | Chen |
| I-Wen      | Peter | Chen |
| Jem-Kun    |       | Chen |
| Lung-Chien |       | Chen |
| Teng-Ming  |       | Chen |
| Wei-Hsin   |       | Chen |
| Yang-Fang  |       | Chen |



|                  |         |              |
|------------------|---------|--------------|
| Yu-Ju            |         | Chen         |
| Hai-Ying         |         | Chen         |
| Jianhan          |         | Chen         |
| Jianjun          |         | Chen         |
| Jingyi           |         | Chen         |
| Shaowei          |         | Chen         |
| Tai-Yen          |         | Chen         |
| Wilfred          |         | Chen         |
| Xi               |         | Chen         |
| Xi               |         | Chen         |
| Yu               |         | Chen         |
| Zhaowei          |         | Chen         |
| Zhe-sheng        |         | Chen         |
| Yu               |         | Chen         |
| Fangyi           |         | Cheng        |
| Jiang            |         | Cheng        |
| Jue              |         | Cheng        |
| Kui              |         | Cheng        |
| Xin-Lu           |         | Cheng        |
| Yiyun            |         | Cheng        |
| Zhenping         |         | Cheng        |
| Chin Kui         |         | Cheng        |
| Chong (Sage)     |         | Cheng        |
| Qianyi           |         | Cheng        |
| Goshtasp         |         | Cheraghian   |
| Artem            |         | Cherkasov    |
| Rajesh           |         | Cherukupalli |
| Banthit          |         | Chetsawang   |
| Bo               |         | Chi          |
| Yuwu             |         | Chi          |
| Buong Woei       |         | Chieng       |
| Stefano          |         | Chimichi     |
| Pawel            |         | Chmielarz    |
| Chan Sik         |         | Cho          |
| Jae Whan         |         | Cho          |
| Soo Gyeong       |         | Cho          |
| Nam-Joon         |         | Cho          |
| Jaebum           |         | Choo         |
| Mukund           | Shankar | Chorghade    |
| Danny Hung-Chieh |         | Chou         |
| Namita           | Roy     | Choudhury    |
| Amitava          |         | Choudhury    |
| Wen-Shyang       |         | Chow         |
| Jin-Ho           |         | Choy         |
| Bjørn            | E.      | Christensen  |
| Ioannis S.       |         | Chronakis    |
| Maksymilian      |         | Chruszcz     |
| Fu-Xiang         |         | Chu          |

|                |         |                   |
|----------------|---------|-------------------|
| Lai Fatt       |         | Chuah             |
| Chu-Chen       |         | Chueh             |
| Yu-Lun         |         | Chueh             |
| Karin          | Y.      | Chumbimuni-Torres |
| Jang           | Ho      | Chun              |
| Chan-Moon      |         | Chung             |
| Tai-Shung      |         | Chung             |
| Po-Wen         |         | Chung             |
| Aram           | J.      | Chung             |
| Tim            | S.      | Chung             |
| Arunabhiram    |         | Chutia            |
| Nicola         |         | Cicero            |
| S.             |         | Cicero            |
| Fabio          |         | Cicoira           |
| Petr           |         | Cigler            |
| Tang           |         | Cilai             |
| Jasmina        |         | Ćilerdžić         |
| Nicola         |         | Cioffi            |
| Amaia          |         | Cipitria          |
| Cagri          |         | Cirak             |
| Gerardo Andres |         | Cisneros          |
| Federico       |         | Cisnetti          |
| Francesco      |         | Ciucci            |
| Gabriela       |         | Clamont-Montfort  |
| Rosa           | M.      | Claramunt         |
| Jon            |         | Clardy            |
| Robert         | Daniel  | Clark             |
| David          | E.      | Clemmer           |
| Guido          | H.      | Clever            |
| Eric           |         | Cloutet           |
| Juan           | Carlos  | Cobas             |
| Fernando       |         | Coelho            |
| Paulo          | J.      | Coelho            |
| Yannick        |         | Coffinier         |
| Sidney         | R.      | Cohen             |
| Evelina        |         | Colacino          |
| Enrique        |         | Colacio           |
| Daniel         | J.      | Cole              |
| Simon          | J.      | Coles             |
| Peter          | J.      | Collings          |
| Sebastian      | E.      | Collins           |
| Juan           | Carlos  | Colmenares        |
| Luiz           | Alberto | Colnago           |
| Emanuela       |         | Colombo           |
| Ivan           |         | Coluzza           |
| Dario          |         | Compagnone        |
| Ana Margarida  |         | Conde Fernandes   |
| Jeanet         |         | Conradie          |

|             |       |                    |
|-------------|-------|--------------------|
| Michael     | Peter | Coogan             |
| Tim         |       | Coolong            |
| Jason       | K.    | Cooper             |
| Thorben     |       | Cordes             |
| Susana      | Inés  | Córdoba De Torresi |
| Jesus       |       | Cordova Guerrero   |
| Laura       | M.    | Cornaglia          |
| Eduardo     | A.    | Coronado           |
| N. Mariano  |       | Correa             |
| Daniel      | S.    | Corrêa             |
| Thiago      | C.    | Correra            |
| Aitziber    | L.    | Cortajarena        |
| Barbara     |       | Cortese            |
| Gonzalo     |       | Cosa               |
| Maurice     |       | Cosandey           |
| Ali         |       | Coskun             |
| Pinalysa    |       | Cosma              |
| Serge       |       | Cosnier            |
| Brandi      | M.    | Cossairt           |
| Mario       |       | Costa              |
| Karine      |       | Costuas            |
| Mircea      |       | Cotlet             |
| Frank       | A. W. | Coumans            |
| Athanassios |       | Coutsolelos        |
| James       | A.    | Cowan              |
| Emily       | D.    | Cranston           |
| Ramon       |       | Crehuet            |
| Margarita   |       | Crespo             |
| Alejandro   |       | Criado             |
| Pascale     |       | Crochet            |
| Leroy       |       | Cronin             |
| Justin      |       | Cross              |
| Cathleen    | M.    | Crudden            |
| Iolanda     | Midea | Cuccovia           |
| Bin-Bin     |       | Cui                |
| Wenguo      |       | Cui                |
| Suxia       |       | Cui                |
| Honggang    |       | Cui                |
| Qiang       |       | Cui                |
| Teresa      |       | Curtin             |
| Antonio     | A. S. | Curvelo            |
| Cathy       | S.    | Cutler             |
| Uroš        |       | Cvelbar            |
| Lukasz      |       | Cwiklik            |
| Cezary      |       | Czapplewski        |
| Jose        | P.    | Da Silva           |
| Eufrânio    | Nunes | da Silva Júnior    |
| Maurizio    |       | Dabbicco           |

|                 |            |                  |
|-----------------|------------|------------------|
| Emiliano        |            | D'Agostino       |
| Dipendra        |            | Dahal            |
| Andreas         | B.         | Dahlin           |
| Hongxing        |            | Dai              |
| Jiangdong       |            | Dai              |
| Jie             |            | Dai              |
| Jungui          |            | Dai              |
| Kai             |            | Dai              |
| Qiguang         |            | Dai              |
| Songyuan        |            | Dai              |
| Wei-Lin         |            | Dai              |
| Qilin           |            | Dai              |
| Xianming        |            | Dai              |
| Udayakumar      |            | Dalimba          |
| Marco           |            | Dallavalle       |
| Sameer          | Vishvanath | Dalvi            |
| Vishwanath      | H.         | Dalvi            |
| Masad           | J.         | Damha            |
| Martin          |            | Danaher          |
| Thomas          |            | Dandekar         |
| Zhi-Min         |            | Dang             |
| Martin          |            | Danko            |
| Ahmad Khodadadi |            | Darban           |
| Ali             |            | Darwiche         |
| Amit            |            | Das              |
| Amit            | Kumar      | Das              |
| Amitava         |            | Das              |
| Debasis         |            | Das              |
| Prasanta        | Kumar      | Das              |
| Ranjan          |            | Das              |
| Samar           | Kumar      | Das              |
| Saurabh         |            | Das              |
| Joydip          |            | Das              |
| Snehasis        |            | Daschakraborty   |
| Swagata         |            | Dasgupta         |
| Jyotirmayee     |            | Dash             |
| Neeraja         |            | Dashaputre       |
| Sahab           |            | Dass             |
| Alokmay         |            | Datta            |
| Ayan            |            | Datta            |
| Olafs           |            | Daugulis         |
| Marie-Hélène    |            | David-Cordonnier |
| Victor          | L.         | Davidson         |
| Jahan           | M.         | Dawlaty          |
| Kenneth         | A.         | Dawson           |
| James           | A.         | Dawson           |
| Martha          |            | Daza             |
| William         | Reis       | de Araujo        |

|               |         |                   |
|---------------|---------|-------------------|
| Bas           |         | de Bruin          |
| Abel          |         | de Cozar          |
| Angelo        |         | de Fatima         |
| Bruno         | G.      | De Geest          |
| Elvira        |         | De Giglio         |
| Bart E. C. G. |         | de Goeij          |
| Bert          | L.      | de Groot          |
| Ernesto       |         | de Jesús          |
| Gema          |         | de la Torre       |
| Carlo         |         | De Micheli        |
| Beatriz       |         | de Pascual-Teresa |
| Beatriz       |         | de Rivas          |
| Bart          | M. J.   | De Spiegeleer     |
| Anne          |         | De Wit            |
| Gijsbertus    |         | de With           |
| Glen          |         | Deacon            |
| Annamaria     |         | Deagostino        |
| Paul          | L.      | DeAngelis         |
| Bimalendu     |         | Deb               |
| Damien        | P.      | Debecker          |
| Michael       |         | Decker            |
| Volker        |         | Deckert           |
| Jared         | B.      | DeCoste           |
| G. Roshan     |         | Deen              |
| Akash         |         | Deep              |
| Francis       | Leonard | Deepak            |
| Gregor        |         | Deichmann         |
| Costantino    |         | Del Gaudio        |
| Francisco     |         | del Monte         |
| Sagar         | D.      | Delekar           |
| Rita          |         | Delgado           |
| Juan          | Luis    | Delgado           |
| Christian     |         | Delles            |
| Oleg          | M.      | Demchuk           |
| Mustafa       | M.      | Demir             |
| Sebastian     |         | Demkowicz         |
| Pascale       |         | Demoment          |
| Jolien        |         | Dendooven         |
| Jianping      |         | Deng              |
| Weiping       |         | Deng              |
| Ziwei         |         | Deng              |
| Shuguang      |         | Deng              |
| Tian-Song     |         | Deng              |
| Adil          |         | Denizli           |
| Scott         | E.      | Denmark           |
| William       | A.      | Denny             |
| Dilip         |         | Depan             |
| Alain         |         | Dequidt           |

|                      |            |                  |
|----------------------|------------|------------------|
| Leila                | F.         | Deravi           |
| Melanie              |            | Derby            |
| Pravas               |            | Deria            |
| Milind               | Madhusudan | Deshmukh         |
| Parag                | Arvind     | Deshpande        |
| Nathaniel            | Aaron      | Deskins          |
| Christophe           |            | Detavernier      |
| Dattatraya           | Hanumant   | Dethe            |
| Abhishek             |            | Dey              |
| Biswajit             |            | Dey              |
| Joykrishna           |            | Dey              |
| M.                   | A.         | Deyab            |
| Amarajothi           |            | Dhakshinamoorthy |
| Prajnaparamita       |            | Dhar             |
| Dibakar              |            | Dhara            |
| Thogluva Janardhanan |            | Dhilip Kumar     |
| Chong-an             |            | Di               |
| Pablo                | Hector     | Di Chenna        |
| Francesco            |            | Di Franco        |
| Ernesto              |            | Di Maio          |
| Francesca            |            | Di Maria         |
| Florent              |            | Di Meo           |
| Rosa                 |            | Di Mundo         |
| Devis                |            | Di Tommaso       |
| M.                   |            | Diab             |
| Peng                 |            | Diao             |
| Eric                 | Wei-Guang  | Diau             |
| Carlos               |            | Díaz-Guerra      |
| Sergio               |            | Díaz-Tendero     |
| David                |            | Dibble           |
| David                |            | Diez             |
| Noel                 |            | Diez             |
| Shashikant           | U.         | Dighe            |
| Nazzareno            |            | Dimasi           |
| Dilyana              |            | Dimova           |
| Mohammad             |            | Dinari           |
| Can                  |            | Dincer           |
| Zhifeng              |            | Ding             |
| Guqiao               |            | Ding             |
| Jianxun              |            | Ding             |
| Ke                   |            | Ding             |
| Liping               |            | Ding             |
| Ming-Wu              |            | Ding             |
| Mingyue              |            | Ding             |
| Shijia               |            | Ding             |
| Weiqiang             |            | Ding             |
| Xun-Lei              |            | Ding             |
| Yi                   |            | Ding             |

|                 |          |             |
|-----------------|----------|-------------|
| Yubin           |          | Ding        |
| Mingye          |          | Ding        |
| Shinn-Jyh       |          | Ding        |
| Hong            |          | Ding        |
| Mahmut          |          | Dirican     |
| Nico            |          | Dissmeyer   |
| Regina          |          | Dittmann    |
| S.              |          | Divya       |
| Oliver          |          | Diwald      |
| Neil            |          | Dixon       |
| David           | A.       | Dixon       |
| Igor            |          | Djerdj      |
| Aleksandar      |          | Djordjevic  |
| Aleksandra      | B.       | Djurisic    |
| Bogdan          | Z.       | Dlugogorski |
| Changwoo        |          | Do          |
| Adrian          | P.       | Dobbs       |
| Sheel           |          | Dodani      |
| Takayuki        |          | Doi         |
| Luis R.         |          | Domingo     |
| Kelling         | J.       | Donald      |
| Bin             |          | Dong        |
| Fan             |          | Dong        |
| Guangneng       |          | Dong        |
| Guifang         |          | Dong        |
| Hai             |          | Dong        |
| Jin-Yong        |          | Dong        |
| Lin             |          | Dong        |
| Lin             |          | Dong        |
| Shuangshi       |          | Dong        |
| Wei             |          | Dong        |
| Xiaoping        |          | Dong        |
| Xiu-Qin         |          | Dong        |
| Yuping          |          | Dong        |
| Zeyuan          |          | Dong        |
| Zhengping       |          | Dong        |
| Xiang Ting      |          | Dong        |
| Mingdong        |          | Dong        |
| Chung Li        |          | Dong        |
| Hong            |          | Dong        |
| Juyao           |          | Dong        |
| Morgan          |          | Donnard     |
| Maria           | Cristina | dos Santos  |
| Wenchao         |          | Dou         |
| Abderrazzak     |          | Douhal      |
| Jean-Paul       |          | Douliez     |
| Courtney        | A.       | Downes      |
| Ecaterina Stela |          | Dragan      |

|              |            |               |
|--------------|------------|---------------|
| Eva          |            | Drapalova     |
| Marija       |            | Drndic        |
| Richard      |            | Dronskowski   |
| Nadjib       |            | Drouiche      |
| Greg         | T.         | Drozd         |
| I. V.        |            | Drozdov       |
| Da-Ming      |            | Du            |
| Hongmei      |            | Du            |
| Jianzhong    |            | Du            |
| Jiguang      |            | Du            |
| Ji-Yuan      |            | Du            |
| Lin          |            | Du            |
| Shixuan      |            | Du            |
| Yuguo        |            | Du            |
| Yukou        |            | Du            |
| Zhenxia      |            | Du            |
| Deguo        |            | Du            |
| Aijun        |            | Duan          |
| Lunbo        |            | Duan          |
| Hui          |            | Duan          |
| Jonathon     | William    | Duay          |
| Travis       |            | Dudding       |
| V.           |            | Dudelev       |
| Alexander    | S.         | Dudnik        |
| Ray          |            | Duffy         |
| Jean         |            | Duhamel       |
| Timothy      | Thomas     | Duignan       |
| K. C.        |            | Dukka         |
| Jean-Nicolas |            | Dumez         |
| Gheorghe     |            | Dumitrascu    |
| Fernando     | Gabriel    | Dupuy         |
| Dominique    |            | Durand        |
| Christian    |            | Durante       |
| Feyyaz       |            | Durap         |
| Timothy      | B.         | Durham        |
| John         | R.         | Dutcher       |
| Meenakshi    |            | Dutt          |
| Pavel        |            | Dvorak        |
| Nelson       | Y.         | Dzade         |
| Thomas       |            | Dziubla       |
| Sergei       | Andreevich | Dzuba         |
| Sergei       | V.         | Dzyuba        |
| Amanollah    |            | Ebadi         |
| Eno          | E.         | Ebenso        |
| Blessing     |            | Eboibi        |
| Solon        | P.         | Economopoulos |
| Mohan        |            | Edirisinghe   |
| Karen        | J.         | Edler         |



|                   |               |                |
|-------------------|---------------|----------------|
| Thomas            | A.            | Edwards        |
| Timothy           | J.            | Egan           |
| Shunji            |               | Egusa          |
| Melanie           |               | Ehrlich        |
| Sara              |               | Eisler         |
| Laurent           |               | El Kaim        |
| Kuppanagounder P. |               | Elango         |
| Shannon           |               | Elf            |
| Mourad            |               | Elhabiri       |
| Menachem          |               | Elimelech      |
| A.                |               | Elmchaouri     |
| Sherif            | A.            | El-Safty       |
| Naglaa            | Salem         | El-Sayed       |
| Adel              |               | El-Sonbati     |
| Amira             |               | El-Yazbi       |
| Steven            | R.            | Emory          |
| Todd              |               | Emrick         |
| David             | J. Hannington | Emslie         |
| Takatsugu         |               | Endo           |
| Takeshi           |               | Endo           |
| Søren             | Balling       | Engelsen       |
| Richard           | Alan          | Engh           |
| Niall             | Joseph        | English        |
| Sandra            |               | Eremia         |
| Paul              | W.            | Erhardt        |
| Ramon             |               | Eritja         |
| Karl-Heinz        |               | Ernst          |
| Daniel            |               | Errandonea     |
| Eustaquio         | Martín        | Erro           |
| Alberto           |               | Escarpa        |
| Juan              |               | Escrig         |
| Ana               |               | Espinosa       |
| Mehdi             | D.            | Esrabili       |
| Daniel            | H.            | Ess            |
| Ruben             |               | Esteban        |
| Andre             |               | Estevez Torres |
| Samuel            |               | Estrada-Soto   |
| Boris             |               | Estrine        |
| Muthusamy         |               | Eswaramoorthy  |
| Claudio           |               | Evangelisti    |
| David             | J.            | Evans          |
| Trefor            |               | Evans          |
| Wenjun            |               | Fa             |
| Bruno             |               | Fabre          |
| Laura             |               | Fabris         |
| Ricardo           |               | Faccio         |
| Elisa             |               | Fadda          |
| G.                |               | Fagadar-Cosmaa |

|             |         |              |
|-------------|---------|--------------|
| Jeffrey     | A.      | Fagan        |
| Giuliana    |         | Faggio       |
| Patrick     |         | Fairclough   |
| Andre       | Ricardo | Fajardo      |
| Rawil       | F.      | Fakhrullin   |
| Paolo       |         | Falcaro      |
| Juan        | Manuel  | Falc3n-P3rez |
| Anne-Laure  |         | Fameau       |
| Chunhai     |         | Fan          |
| Dongbin     |         | Fan          |
| Jiangli     |         | Fan          |
| Jianwei     |         | Fan          |
| Jie-Ping    |         | Fan          |
| Jun         |         | Fan          |
| Li-Zhen     |         | Fan          |
| Louzhen     |         | Fan          |
| Qing-Hua    |         | Fan          |
| Quli        |         | Fan          |
| Wenhong     |         | Fan          |
| Xuesen      |         | Fan          |
| Wei         |         | Fan          |
| Yongsheng   |         | Fan          |
| Jindfich    |         | Fanfr1k      |
| Guiyin      |         | Fang         |
| Ran         |         | Fang         |
| Tao         |         | Fang         |
| Weiguo      |         | Fang         |
| Xiaosheng   |         | Fang         |
| Yun         |         | Fang         |
| Yutang      |         | Fang         |
| Zhiqiang    |         | Fang         |
| Shiyue      |         | Fang         |
| Ye          |         | Fang         |
| Felipe      |         | Fantuzzi     |
| Rouhi       |         | Farajzadeh   |
| Ronaldo     | C.      | Faria        |
| Gianluca    | M.      | Farinola     |
| Zahoor      | Hussain | Farooqi      |
| Tanvir      |         | Farouk       |
| Matthew     |         | Farrell      |
| O. S.       |         | Fatoba       |
| Charl       | F. J.   | Faul         |
| Kenan       |         | Fears        |
| Guilhermino | J. M.   | Fechine      |
| Dmitri      | G.      | Fedorov      |
| Olga        | S.      | Fedorova     |
| Krisztina   |         | Feh3r        |
| Teng        |         | Fei          |

|              |           |                     |
|--------------|-----------|---------------------|
| Wei-Dong     |           | Fei                 |
| Christine    |           | Feillet-Coudray     |
| Barbara      |           | Feist               |
| Marlena      |           | Fejzo               |
| Claus        |           | Felby               |
| Nordin       |           | Felidj              |
| Neus         |           | Feliu               |
| David        | F.        | Feller              |
| Olu Emmanuel |           | Femi                |
| Yong-Lai     |           | Feng                |
| Chao         |           | Feng                |
| Guoqiang     |           | Feng                |
| Hui          |           | Feng                |
| Jiangtao     |           | Feng                |
| Jing         |           | Feng                |
| Jiu-Ju       |           | Feng                |
| Lin          |           | Feng                |
| Shengyu      |           | Feng                |
| Wei          |           | Feng                |
| Xiangming    |           | Feng                |
| Yujun        |           | Feng                |
| Yu-Qi        |           | Feng                |
| Zeng-guo     |           | Feng                |
| Xinjun       |           | Feng                |
| Louis        |           | Fensterbank         |
| Eva          |           | Fenyvesi            |
| Andrew       | D.        | Ferguson            |
| Rodney       | Agustinho | Fernandes           |
| Israel       |           | Fernandez           |
| Raquel       |           | Fernández           |
| Antonio      |           | Fernandez-Barbero   |
| Roberto      |           | Fernandez-Lafuente  |
| Miguel A.    |           | Fernández-Rodríguez |
| Ricardo      |           | Ferraz              |
| Ignacio      | Javier    | Ferrer-Vinent       |
| Suzanne      |           | Fery-Forgues        |
| Ana          |           | Figueiras           |
| Aleksander   |           | Filarowski          |
| Yaroslav     |           | Filinchuk           |
| Marina       | R.        | Filip               |
| Barbara      | J.        | Finlayson-Pitts     |
| Steven       | M.        | Firestine           |
| Andrew       |           | Fischer             |
| Michael      |           | Flythe              |
| Vito         |           | Foderà              |
| Camilla      |           | Foged               |
| Marianna     |           | Foldvari            |
| Rafael       |           | Font                |

|                  |       |                      |
|------------------|-------|----------------------|
| Frédéric-Georges |       | Fontaine             |
| Anna             |       | Fontcuberta i Morral |
| Malcolm          | D. E. | Forbes               |
| Peter            | C.    | Ford                 |
| Cristina         |       | Fornaguera           |
| Paolo            |       | Fornasiero           |
| Alireza          |       | Foroumadi            |
| Lucy             | R.    | Forrest              |
| Maria            |       | Forsyth              |
| John             | S.    | Forsythe             |
| Mario            | C.    | Foti                 |
| Lida             |       | Fotouhi              |
| Reza             |       | Foudazi              |
| Stephen          | H.    | Foulger              |
| Denis            |       | Fourches             |
| Sophie           |       | Fourmentin           |
| J. Brian         |       | Fowlkes              |
| Mark A.          |       | Fox                  |
| Alejandro        | M.    | Fracaroli            |
| David            | J.    | France               |
| Elias            |       | Frances              |
| Cesare           |       | Franchini            |
| Vilius           |       | Franckevicius        |
| Otakar           |       | Frank                |
| Ronald           |       | Frank                |
| Daniel           | C.    | Fredrickson          |
| Darón            | I.    | Freedberg            |
| Colin            | L.    | Freeman              |
| Paul             | S.    | Freemont             |
| Paulo            | T. C. | Freire               |
| Eva              |       | Freisinger           |
| Matheus          | P.    | Freitas              |
| Alfred           | D.    | French               |
| Karel            |       | Friess               |
| Antonio          |       | Frontera             |
| Renee            | R.    | Frontiera            |
| George           | E.    | Froudakis            |
| Johannes         |       | Frueh                |
| Luis Manuel      |       | Frutos               |
| Rogelio          |       | Frutos               |
| Douglass         |       | Fry                  |
| Guoqi            |       | Fu                   |
| Honggang         |       | Fu                   |
| Jianwei          |       | Fu                   |
| Min              |       | Fu                   |
| Ming-Lai         |       | Fu                   |
| Xiuli            |       | Fu                   |
| Zhisheng         |       | Fu                   |

|                 |             |                    |
|-----------------|-------------|--------------------|
| Zuoling         |             | Fu                 |
| Hongyan         |             | Fu                 |
| Denis           |             | Fuentealba         |
| Edwar           |             | Fuentes            |
| Michiya         |             | Fujiki             |
| Kenzo           |             | Fujimoto           |
| Tatsuya         |             | Fujino             |
| Shin-ichiro     |             | Fujita             |
| Takeshi         |             | Fujita             |
| Ryoichi         |             | Fukuda             |
| Takanori        |             | Fukushima          |
| Shunichi        |             | Fukuzumi           |
| Satoru          |             | Funamoto           |
| Kimito          |             | Funatsu            |
| Yukio           |             | Furukawa           |
| Y.              |             | Furukawa           |
| Haruhiko        |             | Fuwa               |
| Jean-Christophe | Paul        | Gabriel            |
| Jakub           | Maksymilian | Gac                |
| Fabien          |             | Gagosz             |
| Jose Ramon      |             | Galan-Mascaros     |
| Annia           |             | Galano             |
| Fernando        |             | Galembeck          |
| Timur           | R.          | Galimzyanov        |
| Hugo            |             | Gallardo           |
| Emilio          |             | Gallicchio         |
| Elena           |             | Galoppini          |
| Michael         |             | Galperin           |
| Celine          |             | Galvagnion         |
| Tiago           | L. P.       | Galvão             |
| Oxana           | V.          | Galzitskaya        |
| Diego           |             | Gamba-Sanchez      |
| Javier          |             | Gamo               |
| Liangbing       |             | Gan                |
| Lihua           |             | Gan                |
| Ning            |             | Gan                |
| Francois        |             | Ganachaud          |
| Subramanian     |             | Ganapathy          |
| Alessandro      |             | Gandini            |
| Vincent         |             | Gandon             |
| Maria Verónica  |             | Ganduglia-Pirovano |
| A.              |             | Ganesan            |
| Krishna         | N.          | Ganesh             |
| V.              |             | Ganesh             |
| Manoj           |             | Ganesh             |
| Mani            |             | Ganesh             |
| Ashok           | Kumar       | Ganguli            |
| Gerd            | F.          | Gantefoer          |

|              |        |                  |
|--------------|--------|------------------|
| Christian    |        | Ganter           |
| Feng         |        | Gao              |
| Huile        |        | Gao              |
| Li           |        | Gao              |
| Lianghui     |        | Gao              |
| Ming         |        | Gao              |
| Mingxia      |        | Gao              |
| Peng         |        | Gao              |
| Shuyan       |        | Gao              |
| Yanfeng      |        | Gao              |
| Yuan         |        | Gao              |
| Zhonghong    |        | Gao              |
| Jinwei       |        | Gao              |
| Yu           |        | Gao              |
| Feng         |        | Gao              |
| Hongcai      |        | Gao              |
| Jianmin      |        | Gao              |
| Wen-Yang     |        | Gao              |
| Yann         |        | Garcia           |
| Felipe       |        | Garcia           |
| Gonzalo      |        | García           |
| Isabel       |        | García           |
| José         | Miguel | García           |
| José         | Manuel | García Fernández |
| Eugenia      |        | García Rubiño    |
| Joaquín      |        | García-Álvarez   |
| Jose Luis    |        | Garcia-Cordero   |
| Luis         |        | García-Rfo       |
| Raul         |        | Garcia-Rodriguez |
| Juan         | Manuel | García-Ruiz      |
| Sergi        |        | Garcia-Segura    |
| Ricard       |        | Garcia-Serna     |
| Dale         | R.     | Gardner          |
| Gil          |        | Garnier          |
| Sean         |        | Garrett-Roe      |
| Jeremy       |        | Garritano        |
| Gil          |        | Garrote          |
| Matthias     |        | Garten           |
| Manas Ranjan |        | Gartia           |
| Ignacio      | L.     | Garzon           |
| Michael      |        | Gatchell         |
| Kent         | S.     | Gates            |
| James        | W.     | Gauld            |
| Klaus        |        | Gawrisch         |
| Sylvia       |        | Gayle            |
| Oz           | M.     | Gazit            |
| José L.      |        | Gázquez          |
| Gabin        |        | Gbabode          |

|               |          |            |
|---------------|----------|------------|
| Jianfang      |          | Ge         |
| Jianping      |          | Ge         |
| Jing-Yuan     |          | Ge         |
| Ziyi          |          | Ge         |
| Yan           |          | Ge         |
| Haibo         |          | Ge         |
| Bernard       |          | Geffroy    |
| Milan         |          | Gembicky   |
| Jianxin       |          | Geng       |
| Wangchang     |          | Geng       |
| Yanhou        |          | Geng       |
| Zhirong       |          | Geng       |
| Guy           | M.       | Genin      |
| Cesare        |          | Gennari    |
| Robert        | J.       | Geraghty   |
| Claudio       |          | Gerbaldi   |
| Iann          | C.       | Gerber     |
| Jean-Francois |          | Gestin     |
| Armin         |          | Geyer      |
| Scott         | M.       | Geyer      |
| Ghanashyam    |          | Ghadge     |
| Mehrorang     |          | Ghaedi     |
| Ahad          |          | Ghaemi     |
| Farshid       |          | Ghanbari   |
| Khashayar     |          | Ghandi     |
| Santosh J.    |          | Gharpure   |
| Mostafa       |          | Ghasemi    |
| Hadi          |          | Ghasemi    |
| Majid         |          | Ghashang   |
| Jalal         |          | Ghilane    |
| Uttam         | Kumar    | Ghorai     |
| Aurnab        |          | Ghose      |
| Ashutosh      |          | Ghosh      |
| Kumaresh      |          | Ghosh      |
| Pradyut       |          | Ghosh      |
| Siddhartha    | Sankar   | Ghosh      |
| Soumen        |          | Ghosh      |
| Subrata       |          | Ghosh      |
| Suhrit        |          | Ghosh      |
| Sujit         | K.       | Ghosh      |
| Sujit         | Kumar    | Ghosh      |
| Anindya       |          | Ghosh      |
| Tushar        | K.       | Ghosh      |
| Vikas         | D.       | Ghule      |
| Marco         |          | Giampà     |
| Julianne      | Montfort | Gibbs      |
| Notburga      |          | Gierlinger |
| Pieter        |          | Gijsman    |

|                 |        |                   |
|-----------------|--------|-------------------|
| M. L. Almoraima |        | Gil               |
| Antonio         |        | Gilberto Ferreira |
| Lidon           |        | Gil-Escrig        |
| Edward          | G.     | Gillan            |
| Elizabeth       | R.     | Gillies           |
| Dennis          | G.     | Gillingham        |
| Sean            | F.     | Gilmore           |
| Michael         | K.     | Gilson            |
| M. Concepción   |        | Gimeno            |
| Juan            | Jose   | Giner-Casares     |
| Valeriy         | V.     | Ginzburg          |
| Paolo           |        | Giordani          |
| Hubert          | H.     | Girault           |
| P. K.           |        | Giri              |
| Namita          |        | Giri              |
| Koyeli          |        | Girigoswami       |
| Riess           |        | Gisbert           |
| Richard         | S.     | Glass             |
| Gregory         | Melvin | Glenn             |
| Ksenija         | D.     | Glusac            |
| Alexey          | M.     | Glushenkov        |
| Gregor          |        | Gluth             |
| Elumalai        |        | Gnanamani         |
| Boopathy        |        | Gnanaprakasam     |
| Radha           |        | Gobinda Bhuin     |
| Atul            |        | Goel              |
| Parag           | R.     | Gogate            |
| Bilal           |        | Gökce             |
| Bernd           |        | Goldfuss          |
| Alan            | S.     | Goldman           |
| Montserrat      |        | Gómez             |
| Ramon           |        | Gomez Arrayas     |
| Ana             | María  | Gómez Marín       |
| Santiago        |        | Gómez Ruiz        |
| Juan Luis       |        | Gómez-Cámer       |
| Sergio          |        | Gómez-Graña       |
| Jaime           |        | Gómez-Morales     |
| Hegui           |        | Gong              |
| Jingming        |        | Gong              |
| Junbo           |        | Gong              |
| Xue-Dong        |        | Gong              |
| Yun             |        | Gong              |
| David           |        | Gonzales          |
| Juan            | C.     | González          |
| Carlos          |        | González          |
| Concepción      |        | González-Bello    |
| Humbert         |        | González-Díaz     |
| Gustavo         |        | González-Gaitano  |



|                      |       |                     |
|----------------------|-------|---------------------|
| David                |       | Gonzalez-Rodriguez  |
| Guillermo            |       | González-Rubio      |
| Wenceslao            |       | González-Viñas      |
| David                | S.    | Goodsell            |
| Hosahudya            | N.    | Gopi                |
| Chandu V. V. Muralee |       | Gopi                |
| Purushothaman        |       | Gopinath            |
| Gennady              | Y.    | Gor                 |
| Anne                 |       | Gorden              |
| Keith                | C.    | Gordon              |
| Dmitry               | A.    | Gorin               |
| Chris                |       | Gorman              |
| Rajib                | Kumar | Goswami             |
| Shyamaprosad         |       | Goswami             |
| Sreebrata            |       | Goswami             |
| Joel                 |       | Gottesfeld          |
| Xin                  |       | Gou                 |
| Maria                |       | Goula               |
| Diana Cláudia        |       | Gouveia Alves Pinto |
| Thimmaiah            |       | Govindaraju         |
| E. Bhoje             |       | Gowd                |
| Channe               |       | Gowda D.            |
| Rafael               |       | Gozalbes            |
| Slawomir             | J.    | Grabowski           |
| Thomas               | M.    | Gradziel            |
| Robert               |       | Granet              |
| Andrew               | S.    | Grant               |
| Jerome               |       | Graton              |
| Steven               | W.    | Graves              |
| Murray               | R.    | Gray                |
| Giovanni             |       | Grazioso            |
| Juozas               | Vidas | Grazulevicius       |
| Matthew              | D.    | Green               |
| Micah                | J.    | Green               |
| William              | H.    | Green               |
| Lauren               | F.    | Greenlee            |
| C Michael            |       | Greenlief           |
| Alexander            |       | Greer               |
| Gordon               | Wayne | Gribble             |
| Greg                 |       | Griffin             |
| Brunella             |       | Grigolo             |
| Karine R.            |       | Grigoryan           |
| Craig A.             |       | Grimes              |
| Stefan               |       | Grimme              |
| Gerrit               |       | Groenhof            |
| Ernest               | V.    | Groman              |
| Claude               | P.    | Gros                |
| J. Stuart            |       | Grossert            |

|            |          |                |
|------------|----------|----------------|
| Alexander  |          | Grushow        |
| Daniel     | Tomasz   | Gryko          |
| Marek      |          | Grzelczak      |
| Qiong      |          | Gu             |
| Wen        |          | Gu             |
| Xianfeng   |          | Gu             |
| Xiaoli     |          | Gu             |
| Xiaoli     |          | Gu             |
| Xinggui    |          | Gu             |
| Yanlong    |          | Gu             |
| Zhenhua    |          | Gu             |
| Zhipeng    |          | Gu             |
| Hongzhou   |          | Gu             |
| Yuwei      |          | Gu             |
| G.         |          | Guan           |
| Jianguo    |          | Guan           |
| Jingqi     |          | Guan           |
| Rongfa     |          | Guan           |
| Zhongjie   |          | Guan           |
| Weisheng   |          | Guan           |
| Cao        |          | Guan           |
| Lan        |          | Guan           |
| Roberto    |          | Guardani       |
| Nikhil     |          | Guchhait       |
| Anna       | D.       | Gudmundsdottir |
| Yann       |          | Guerardel      |
| Gaetano    |          | Guerra         |
| Antonio    |          | Guerrero       |
| lorenzo    |          | guerrini       |
| Suchismita |          | Guha           |
| Yingang    |          | Gui            |
| Emilie     | Brigitte | Guidez         |
| Stefan     |          | Guldin         |
| Mihaela    |          | Gulea          |
| Anton      | V.       | Gulevich       |
| Yurii      | K.       | Gun'ko         |
| Ulrich     | L.       | Günther        |
| Hong       |          | Guo            |
| Chongfeng  |          | Guo            |
| Cun-Yue    |          | Guo            |
| Hong       |          | Guo            |
| Hongxia    |          | Guo            |
| Junjie     |          | Guo            |
| Kai        |          | Guo            |
| Kunkun     |          | Guo            |
| Ming-Quan  |          | Guo            |
| Qi-Xiang   |          | Guo            |
| Sandong    |          | Guo            |

|            |           |                    |
|------------|-----------|--------------------|
| San-Dong   |           | Guo                |
| Shouwu     |           | Guo                |
| Xiaojun    |           | Guo                |
| Xin        |           | Guo                |
| Xuefeng    |           | Guo                |
| Xuhong     |           | Guo                |
| Yongfu     |           | Guo                |
| Yuanqiang  |           | Guo                |
| Zhiqian    |           | Guo                |
| Li-Na      |           | Guo                |
| Mengping   |           | Guo                |
| Xingjie    |           | Guo                |
| Xing-Zhong |           | Guo                |
| Zhanhu     |           | Guo                |
| Kailash C. |           | Gupta              |
| Raju       | Kumar     | Gupta              |
| Vinay      |           | Gupta              |
| Vinod      | Kumar     | Gupta              |
| R.         |           | Gupta              |
| Vsevolod   | V.        | Gurevich           |
| Tayur      | N.        | Guru Row           |
| Jeffrey    | Louis     | Gustafson          |
| Humberto   | Rodriguez | Gutierrez          |
| Maciej     |           | Gutowski           |
| Michael    |           | Gütschow           |
| Manonmani  |           | H.K                |
| Tai Hwan   |           | Ha                 |
| Young-Geun |           | Ha                 |
| C.         |           | Ha                 |
| Aziz       |           | Habibi-Yangjeh     |
| Makhluf    | J.        | Haddadin           |
| Jodi       | Ann       | Hadden             |
| Marilena   |           | Hadjidemetriou     |
| Dimitra    | J.        | Hadjipavlou-Litina |
| Frank      |           | Hagelberg          |
| Hossam     |           | Haick              |
| Norbert    |           | Haider             |
| Shozeb     | M.        | Haider             |
| Abdollah   |           | Hajalilou          |
| Alakananda |           | Hajra              |
| Jayanta    |           | Haldar             |
| Robert     | Clark     | Hale               |
| Bassim     |           | Hameed             |
| Abdul      |           | Hameed             |
| Elizabeth  | I.        | Hamelin            |
| Ian        |           | Hamerton           |
| Ian        | W.        | Hamley             |
| Trevor     | A.        | Hamlin             |

|              |           |              |
|--------------|-----------|--------------|
| Cyrille      |           | Hamon        |
| Bao-Hang     |           | Han          |
| Gaoyi        |           | Han          |
| Hongwei      |           | Han          |
| Jianlin      |           | Han          |
| Jiantao      |           | Han          |
| Jianwei      |           | Han          |
| Jingbin      |           | Han          |
| Jingquan     |           | Han          |
| Min          |           | Han          |
| Wei          |           | Han          |
| Yinfeng      |           | Han          |
| Wei          |           | Han          |
| Dong-Wook    |           | Han          |
| Jin          |           | Han          |
| Ming-Yong    |           | Han          |
| Gang         |           | Han          |
| Xu           |           | Han          |
| Sachin       |           | Handa        |
| Ulrich       | Alexander | Handge       |
| Scott        | T.        | Handy        |
| To Thi Xuan  |           | Hang         |
| Franziska    | S.        | Hanschen     |
| Poul Erik    |           | Hansen       |
| Niels        |           | Hansen       |
| Wolfgang     |           | Hansen       |
| D.           | Flemming  | Hansen       |
| Julien       |           | Hanson       |
| Kenneth      |           | Hanson       |
| Timothy      | P.        | Hanusa       |
| Jiri         |           | Hanusek      |
| Jingcheng    |           | Hao          |
| Xinmin       |           | Hao          |
| Yuanqiang    |           | Hao          |
| Moussab      |           | Harb         |
| Justin       | S. J.     | Hargreaves   |
| Mahesh       |           | Hariharan    |
| Sivasankaran |           | Harish       |
| William      | R.        | Harrell      |
| Daniel       |           | Harries      |
| Hiroshi      |           | Hasegawa     |
| Kiyoshi      |           | Hasegawa     |
| Tatsuo       |           | Hasegawa     |
| Kouichi      |           | Hasegawa     |
| Kurt         |           | Haselwandter |
| Makoto       |           | Hashimoto    |
| A. Stephen   | K.        | Hashmi       |
| Md           | Imtaiyaz  | Hassan       |

|             |         |           |
|-------------|---------|-----------|
| Azman       |         | Hassan    |
| Aydin       |         | Hassani   |
| Chris       | S.      | Hawes     |
| Craig       | J.      | Hawker    |
| Nobuyuki    |         | Hayashi   |
| P.          |         | Hayden    |
| Brian       | S.      | Haynes    |
| Trevor      | W.      | Hayton    |
| Ryan        | C.      | Hayward   |
| Adeeb       |         | Hayyan    |
| Maan        |         | Hayyan    |
| Partha      |         | Hazra     |
| Susanta     |         | Hazra     |
| Lizhong     |         | He        |
| Changcheng  |         | He        |
| Chuanglong  |         | He        |
| Chunju      |         | He        |
| Fei         |         | He        |
| Gaohong     |         | He        |
| Guang-Jian  |         | He        |
| Jing        |         | He        |
| Jingfeng    |         | He        |
| Jinlin      |         | He        |
| Man         |         | He        |
| Ming        |         | He        |
| Quanguo     |         | He        |
| Tao         |         | He        |
| Wei-Min     |         | He        |
| Xiao        |         | He        |
| Xiaohua     |         | He        |
| Xingquan    |         | He        |
| Xuehao      |         | He        |
| Yan-Bing    |         | He        |
| Songbo      |         | He        |
| Ping        |         | He        |
| Steven      |         | He        |
| Jana        |         | Hedrich   |
| Mohamed Abd | Al-Azim | Hegazy    |
| Gurumurthy  |         | Hegde     |
| Hongjun     |         | Hei       |
| Mike        |         | Heilemann |
| Christian   |         | Heinis    |
| Lars        |         | Heinke    |
| Hendrik     |         | Heinz     |
| Christoph   |         | Held      |
| William     | T.      | Heller    |
| Thomas      |         | Hellweg   |
| Volkhard    |         | Helms     |

|             |         |                 |
|-------------|---------|-----------------|
| Eva         |         | Hemmer          |
| W.          |         | Henderson       |
| Stefan      |         | Henkel          |
| Malou       |         | Henriksen-Lacey |
| Hoseok      |         | Heo             |
| Young-Woo   |         | Heo             |
| Maria       |         | Hepel           |
| Leandro     | S.      | Herculano       |
| Paul J.     |         | Hergenrother    |
| Fernando    |         | Herranz         |
| Raquel      | P.      | Herrera         |
| Margarita   |         | Herrera-Alonso  |
| Dennis      | W.      | Hess            |
| Gerhard     |         | Hessler         |
| Belinda     | J. M.   | Heyne           |
| Philippe    | Charles | Hiberty         |
| Robin       | G.      | Hicks           |
| A. M.       |         | Hidalgo         |
| Robert      | C.      | Hider           |
| Kyohei      |         | Higashi         |
| Takeshi     |         | Higashiguchi    |
| Daniel      | A.      | Higgins         |
| Kazuhiro    |         | Higuchi         |
| Yusuke      |         | Higuchi         |
| Yasuyuki    |         | Hikita          |
| Peter       |         | Hildebrandt     |
| Rolf        |         | Hilgenfeld      |
| Eric        | H.      | Hill            |
| Roger       | N.      | Hilten          |
| Peter       |         | Hinterdorfer    |
| Ulrich      |         | Hintermair      |
| Atsushi     |         | Hirano          |
| Koji        |         | Hirano          |
| Hajime      |         | Hirao           |
| Fumio       |         | Hirata          |
| Yasushi     |         | Hirose          |
| Yuichiro    |         | Hirota          |
| Abraham     |         | Hirshberg       |
| Pipsa       |         | Hirva           |
| Drahomir    |         | Hnyk            |
| Kuo-Chuan   |         | Ho              |
| Michal      |         | Hocek           |
| Gerhard     |         | Hofer           |
| Robert      | M.      | Hoffman         |
| Johan       |         | Hofkens         |
| Christopher | J.      | Hogan Jr.       |
| Cornelis    | H.      | Hokke           |
| David       |         | Hokza           |

|           |           |                  |
|-----------|-----------|------------------|
| Christian |           | Holm             |
| Hoi-Ying  | N.        | Holman           |
| Thomas    | A.        | Holme            |
| Vera      |           | Homem            |
| Mei       |           | Hong             |
| Wei       |           | Hong             |
| Wenjing   |           | Hong             |
| Xin       |           | Hong             |
| Seunghun  |           | Hong             |
| Suck Won  |           | Hong             |
| Haiping   |           | Hong             |
| Guosong   |           | Hong             |
| Jan       |           | Honziček         |
| Dragos    |           | Horvath          |
| Yu        |           | Hoshino          |
| Narayan   | S.        | Hosmane          |
| Sayed     | M.        | Hosseini         |
| Mona      |           | Hosseini-Sarvari |
| Hongwei   |           | Hou              |
| Linxi     |           | Hou              |
| Wanguo    |           | Hou              |
| Xian      |           | Hou              |
| Xianglin  |           | Hou              |
| Yanglong  |           | Hou              |
| Youmin    |           | Hou              |
| Catherine | Elizabeth | Housecroft       |
| Dmytro M. |           | Hovorun          |
| Gareth    | P.        | Howell           |
| Wolfgang  |           | Hoyer            |
| Atsushi   |           | Hozumi           |
| Kiril     | D.        | Hristovski       |
| David     | A.        | Hrovat           |
| Kuangwen  |           | Hsieh            |
| Hsu-Cheng |           | Hsu              |
| Yongfeng  |           | Hu               |
| Bin       |           | Hu               |
| Bin       |           | Hu               |
| Chang-Wei |           | Hu               |
| Rongrong  |           | Hu               |
| Xianluo   |           | Hu               |
| Xiaohong  |           | Hu               |
| Xiaoyun   |           | Hu               |
| Xiulan    |           | Hu               |
| Xuebing   |           | Hu               |
| Yong      |           | Hu               |
| Yuan      |           | Hu               |
| Yuefei    |           | Hu               |
| Zhigao    |           | Hu               |

|            |  |       |
|------------|--|-------|
| Fang       |  | Hu    |
| Che-Chia   |  | Hu    |
| Jinbo      |  | Hu    |
| Jianli     |  | Hua   |
| Ruimao     |  | Hua   |
| Shu        |  | Huang |
| Baibiao    |  | Huang |
| Biao       |  | Huang |
| Cheng Zhi  |  | Huang |
| Fei        |  | Huang |
| Feihe      |  | Huang |
| Fuping     |  | Huang |
| Hongliang  |  | Huang |
| Huajie     |  | Huang |
| Hui        |  | Huang |
| Jianhan    |  | Huang |
| Jiarui     |  | Huang |
| Kun        |  | Huang |
| Ling       |  | Huang |
| Min        |  | Huang |
| Qing       |  | Huang |
| Rong-Bin   |  | Huang |
| Shi-Wen    |  | Huang |
| Shuai      |  | Huang |
| Sumei      |  | Huang |
| Wei        |  | Huang |
| Wei        |  | Huang |
| Wei        |  | Huang |
| Xiaolin    |  | Huang |
| Xiaoqing   |  | Huang |
| Xiao-Ying  |  | Huang |
| Xiaoyong   |  | Huang |
| Xiaoyu     |  | Huang |
| Xin        |  | Huang |
| Xing-Jiu   |  | Huang |
| Yaji       |  | Huang |
| Yanlin     |  | Huang |
| Yong       |  | Huang |
| Yuan       |  | Huang |
| Yuming     |  | Huang |
| Huabo      |  | Huang |
| Wei        |  | Huang |
| Haitao     |  | Huang |
| Kuo-Wei    |  | Huang |
| Chih-Chia  |  | Huang |
| Chih-Ching |  | Huang |
| Jie        |  | Huang |
| Bing       |  | Huang |



|                |         |                  |
|----------------|---------|------------------|
| Ke-Jing        |         | Huang            |
| Mia            |         | Huang            |
| Xuefei         |         | Huang            |
| Zhe            |         | Huang            |
| Jochen         | S.      | Hub              |
| Tim            |         | Hucho            |
| Reggie         | L.      | Hudson           |
| Thorsten       |         | Hüffer           |
| Xin-Ping       |         | Hui              |
| Martin         |         | Hulce            |
| Eduardo        |         | Humeres          |
| Jia            |         | Huo              |
| James          | Kendall | Hurst            |
| Jurriaan       |         | Huskens          |
| Akhtar         |         | Hussain          |
| Manwar         |         | Hussain          |
| Mohd           | Azlan   | Hussain          |
| Mohd Hazwan    |         | Hussin           |
| Isabelle       |         | Huynen           |
| Do Kyung       |         | Hwang            |
| Nathaniel      | S.      | Hwang            |
| Seok-Ho        |         | Hwang            |
| Dong Soo       |         | Hwang            |
| Hong-Sik       |         | Hwang            |
| Stephen        | T.      | Hyde             |
| Ilich          | A.      | Ibarra           |
| Wilfredo       |         | Ibarra-Hernández |
| Hussameldin    |         | Ibrahim          |
| Junji          |         | Ichikawa         |
| Hosni          |         | Idrissi          |
| Jordi          |         | Ignés-Mullol     |
| Satoshi        |         | Iikubo           |
| Shigeru        |         | Ikeda            |
| Tadaaki        |         | Ikoma            |
| Hiriyakkanavar |         | Ila              |
| Andrey         |         | Ilatovskiy       |
| Muhammad       |         | Ilias            |
| Francesc       |         | Illas            |
| Sung Gap       |         | Im               |
| Hong G         |         | Im               |
| Hiroshi        |         | Imahori          |
| Nobuhito       |         | Imanaka          |
| Su-II          |         | In               |
| Antonia        |         | Infantes-Molina  |
| Yoshiya        |         | Inokuchi         |
| Ken-ichi       |         | Inoue            |
| Taiki          |         | Inoue            |
| Yutaka         |         | Inoue            |

|             |              |                   |
|-------------|--------------|-------------------|
| Katsuhisa   |              | Inoue             |
| Ioana       | A.           | Ionut             |
| Joel        |              | Ireta             |
| Alessia     |              | Irrera            |
| Lucio       |              | Isa               |
| Lyle        |              | Isaacs            |
| Shoji       |              | Ishizaka          |
| Erin        | Valentina    | Iski              |
| Saiful      | M.           | Islam             |
| Fyaz        | M. D.        | Ismail            |
| Yoshiki     |              | Iso               |
| Akira       |              | Isogai            |
| Abdirisak   | Ahmed        | Isse              |
| Georges     |              | Istamboulié       |
| Akihiro     |              | Ito               |
| Hajime      |              | Ito               |
| Shingo      |              | Ito               |
| Shinobu     |              | Itoh              |
| Yoshimitsu  |              | Itoh              |
| Shinichi    |              | Itsuno            |
| Sergei      | A.           | Ivanov            |
| Masao       |              | Iwamatsu          |
| Yuji        |              | Iwamoto           |
| Munetaka    |              | Iwamura           |
| Parameswar  | Krishnan     | Iyer              |
| Arun        | K.           | Iyer              |
| Hironori    |              | Izawa             |
| Celly       | M. Shinohara | Izumi             |
| William     | M.           | Jacobs            |
| Karin       |              | Jacobson          |
| Denis       |              | Jacquemin         |
| Kamalakar   | Marutirao    | Jadhav            |
| Sushilkumar | A.           | Jadhav            |
| Stephan     |              | Jaenicke          |
| Mohsen      |              | Jafari            |
| Nicole      |              | Jaffrezic-Renault |
| Charl       | Jeremy       | Jafta             |
| R. V.       |              | Jagadeesh         |
| N. R.       |              | Jagannathan       |
| Nadine      |              | Jagerovic         |
| Balaji      | R.           | Jagirdar          |
| Md Sarwar   |              | Jahan             |
| Vimal       | K.           | Jain              |
| Ankur       |              | Jain              |
| Frieder     |              | Jäkle             |
| I.          |              | Jakovcevski       |
| Babak       |              | Jaleh             |
| Farideh     |              | Jalilehvand       |

|                   |              |                 |
|-------------------|--------------|-----------------|
| Jeng-Shiung       |              | Jan             |
| Biman             |              | Jana            |
| Nikhil            | R.           | Jana            |
| Tushar            |              | Jana            |
| Dominik           |              | Jańczewski      |
| Doo-Ok            |              | Jang            |
| Ho Won            |              | Jang            |
| Muhammad Ramzan   | Saeed Ashraf | Janjua          |
| Piotr             |              | Jankowski       |
| Dick B.           |              | Janssen         |
| Anwar             |              | Jardine         |
| Purim             |              | Jarujamrus      |
| K.                |              | Jarukumjorn     |
| Agnieszka         | Maria        | Jastrzębska     |
| S.                |              | Javadian        |
| Shahrzad          |              | Javanshir       |
| S. Mathi          |              | Jaya            |
| Sundaramurthy     |              | Jayaraman       |
| Kolleboyina       |              | Jayaramulu      |
| Mohamed           |              | Jebrane         |
| Masilamani        |              | Jeganmohan      |
| Thomas M.         |              | Jeitner         |
| Raz               |              | Jelinek         |
| Coty              | N.           | Jen             |
| Ajay              | Kumar        | Jena            |
| Jeremy            | L.           | Jenkins         |
| Gannon            | Kane         | Jennings        |
| Anker             | Degn         | Jensen          |
| Frank             |              | Jensen          |
| Bup Ju            |              | Jeon            |
| Jong-Rok          |              | Jeon            |
| Sangmin           |              | Jeon            |
| Seong-Min         |              | Jeong           |
| Steffen           |              | Jeschke         |
| Gunnar            |              | Jeschke         |
| Kadarkaraithangam |              | Jeyasubramanian |
| Prakash           | Chandra      | Jha             |
| Xiangling         |              | Ji              |
| Xiaobo            |              | Ji              |
| Xu                |              | Ji              |
| Chun-Jiang        |              | Jia             |
| Chun-Sheng        |              | Jia             |
| Hao               |              | Jia             |
| Jianfeng          |              | Jia             |
| Meilin            |              | Jia             |
| Nengqin           |              | Jia             |
| Yanxing           |              | Jia             |
| Bo Wen            |              | Jia             |

|            |          |                       |
|------------|----------|-----------------------|
| Xuchuan    |          | Jiang                 |
| Bo         |          | Jiang                 |
| Dechen     |          | Jiang                 |
| Fengxing   |          | Jiang                 |
| Guohua     |          | Jiang                 |
| Hai-Long   |          | Jiang                 |
| Hua        |          | Jiang                 |
| Jian-Hui   |          | Jiang                 |
| Jianzhuang |          | Jiang                 |
| Jia-Xing   |          | Jiang                 |
| Lang       |          | Jiang                 |
| Qing       |          | Jiang                 |
| Shichun    |          | Jiang                 |
| Tao        |          | Jiang                 |
| Wei        |          | Jiang                 |
| Xiue       |          | Jiang                 |
| Xueliang   |          | Jiang                 |
| Xuesong    |          | Jiang                 |
| Xulin      |          | Jiang                 |
| Yadong     |          | Jiang                 |
| Yuan       |          | Jiang                 |
| Zhong-Jie  |          | Jiang                 |
| Zhongyi    |          | Jiang                 |
| Zuo-Quan   |          | Jiang                 |
| Chuangdao  |          | Jiang                 |
| Tao        |          | Jiang                 |
| Shuai      |          | Jiang                 |
| De-en      |          | Jiang                 |
| Long       |          | Jiang                 |
| Rongzhong  |          | Jiang                 |
| Tao        |          | Jiang                 |
| Xing       |          | Jiang                 |
| Lulin      |          | Jiang                 |
| Lijuan     |          | Jiao                  |
| Li         |          | Jie                   |
| M.         | Consuelo | Jiménez               |
| Dorleta    |          | Jimenez de Aberasturi |
| Jose Luis  |          | Jimenez Perez         |
| Jesús      |          | Jiménez-Barbero       |
| Gonzalo    |          | Jiménez-Osés          |
| Jian       |          | Jin                   |
| Lan        |          | Jin                   |
| Qiao       |          | Jin                   |
| Zhaoxia    |          | Jin                   |
| Tienan     |          | Jin                   |
| Yong Wan   |          | Jin                   |
| Liyu       |          | Jin                   |
| Chunyuan   |          | Jin                   |

|              |        |                    |
|--------------|--------|--------------------|
| Jiaqi        |        | Jin                |
| Liqiang      |        | Jing               |
| Xin          |        | Jing               |
| Zhanxin      |        | Jing               |
| Vijay        |        | John               |
| Grant        | Edward | Johnson            |
| Ray          |        | Jones              |
| Christopher  | W.     | Jones              |
| Gavin        | O.     | Jones              |
| Sreekantha   | Babu   | Jonnalagadda       |
| Kenneth      | D.     | Jordan             |
| Delphine     |        | Joseph             |
| James        |        | Joseph             |
| Kandasamy    |        | Jothivenkatachalam |
| John         | A.     | Joule              |
| Michael      |        | Jourdes            |
| V. Blair     |        | Journigan          |
| Beatriz      | H.     | Juarez             |
| Eusebio      |        | Juaristi           |
| Miguel       |        | Julve              |
| Jae Woong    |        | Jung               |
| Hun-Gi       |        | Jung               |
| Kwang-Deog   |        | Jung               |
| Yeon Sik     |        | Jung               |
| Young Mee    |        | Jung               |
| Alois        |        | Jungbauer          |
| Oana         | D.     | Jurchescu          |
| Petr         |        | Jurecka            |
| Stefan       |        | Jurga              |
| Emily        | M.     | Jutkiewicz         |
| John         |        | Juvik              |
| Rajesh Kumar |        | Jyothi             |
| Joel         | L.     | Kaar               |
| Jun-ichi     |        | Kadokawa           |
| Memet        | Veziir | Kahraman           |
| B.           |        | Kahveci            |
| Vasily       | V.     | Kaichev            |
| Angel        | E.     | Kaifer             |
| Suresh       | Kumar  | Kailasa            |
| Markus       |        | Kaiser             |
| Noritada     |        | Kaji               |
| Koichi       |        | Kajihara           |
| Satoshi      |        | Kajiyama           |
| Arvin        |        | Kakekhani          |
| Akira        |        | Kakugo             |
| Kourosh      |        | Kalantar-Zadeh     |
| Pranav       |        | Kalelkar           |
| Dimitrios    |        | Kaloudas           |

|                 |           |                  |
|-----------------|-----------|------------------|
| Sumit           |           | Kalsi            |
| Katalin         |           | Kamaras          |
| Krishna         |           | Kamasamudram     |
| Prashant        | V.        | Kamat            |
| Ganesh          |           | Kamath           |
| Ken-ichiro      |           | Kamei            |
| Masami          |           | Kamigaito        |
| Satoshi         |           | Kamiguchi        |
| Hidehiro        |           | Kamiya           |
| Motomu          |           | Kanai            |
| Katsuhiko       |           | Kanaizuka        |
| Balasubramanian |           | Kandasubramanian |
| Kosuke          |           | Kaneko           |
| Tatsuo          |           | Kaneko           |
| Katsuichi       |           | Kanemoto         |
| Yusuf           | Valentino | Kaneti           |
| Shifei          |           | Kang             |
| Wanli           |           | Kang             |
| Weimin          |           | Kang             |
| Byoungwoo       |           | Kang             |
| Moon Sung       |           | Kang             |
| Sang Wook       |           | Kang             |
| Sung Gu         |           | Kang             |
| Yong Soo        |           | Kang             |
| Young Soo       |           | Kang             |
| Borui           |           | Kang             |
| Hyeran          |           | Kang             |
| Jun Yong        |           | Kang             |
| Tönis           |           | Kanger           |
| Alexander       | L.        | Kanibolotsky     |
| Sreejith        |           | Kaniyankandy     |
| Naoki           |           | Kano             |
| Eric Assen B.   |           | Kantchev         |
| Srinivas        |           | Kantevari        |
| Irfan           |           | Karagoz          |
| Selhan          |           | Karagoz          |
| Marcin          |           | Karbarz          |
| Matthias        |           | Karg             |
| Mikko           |           | Karttunen        |
| Hemamala        | I.        | Karunadasa       |
| Chockalingam    |           | Karunakaran      |
| Ramasamy        |           | Karvembu         |
| Vaclav          |           | Kasicka          |
| Artur           |           | Kasprzak         |
| Ken-ichi        |           | Kasuya           |
| Masako          |           | Kato             |
| Shin-ichiro     |           | Kato             |
| Alexander       |           | Katz             |

|                |        |                |
|----------------|--------|----------------|
| Yair           |        | Kaufman        |
| Ajeet          | Kumar  | Kaushik        |
| Daisuke        |        | Kawaguchi      |
| Hiroyoshi      |        | Kawakami       |
| Takashi        |        | Kawakami       |
| Akira          |        | Kawamura       |
| Jun            |        | Kawano         |
| Y.             |        | Kawase         |
| Yoshinori      |        | Kawase         |
| Sibudjing      |        | Kawi           |
| Muammer        |        | Kaya           |
| Nilhan         |        | Kayaman-Apohan |
| Guoliang       |        | Ke             |
| Amy            | E.     | Keating        |
| Yoko           |        | Kebukawa       |
| Stephanie      | A.     | Kedzior        |
| Tamás          |        | Kégl           |
| Timothy        | A.     | Keiderling     |
| Frerich        | J.     | Keil           |
| Ozgul          |        | Keles          |
| Dhanashree     |        | Kelkar         |
| Malcolm        | A.     | Kelland        |
| Richard        | M.     | Kellogg        |
| Emine          |        | Kemiklioğlu    |
| Krzysztof      |        | Kempa          |
| Bjorn          |        | Kemper         |
| Pravin         |        | Kendrekar      |
| Pierre         |        | Kennepohl      |
| Kasper         | P.     | Kepp           |
| Julia          | K.     | Kepler         |
| Kagan          |        | Kerman         |
| Richard        |        | Kerner         |
| Miklos         |        | Kertesz        |
| Peter          |        | Keša           |
| Vadim          | G.     | Kessler        |
| Manukyan       |        | Khachatur      |
| Sadaf          | Bashir | Khan           |
| Muhammad Usman |        | Khan           |
| Ziyauddin      |        | Khan           |
| Niveen         | M.     | Khashab        |
| Firas          |        | Khatib         |
| Sook Mei       |        | Khor           |
| Wisam          | J.     | Khudhayer      |
| Sergey         | L.     | Khursan        |
| Bryce          | E.     | Kidd           |
| Philip         | M.     | Kiefer         |
| Adam           |        | Kiejna         |
| Yoshihiro      |        | Kikkawa        |

|             |            |                      |
|-------------|------------|----------------------|
| Raghavendra |            | Kikkeri              |
| Anthony     | J.         | Killard              |
| Yoong-Ahm   |            | Kim                  |
| Byeong-Su   |            | Kim                  |
| Byoung-Suhk |            | Kim                  |
| Cheal       |            | Kim                  |
| Do Kyung    |            | Kim                  |
| Dong Sung   |            | Kim                  |
| Dongho      |            | Kim                  |
| Doseok      |            | Kim                  |
| Hak Yong    |            | Kim                  |
| Hong-Seok   |            | Kim                  |
| In Su       |            | Kim                  |
| Jaechang    |            | Kim                  |
| Jeongkwon   |            | Kim                  |
| Jeung Gon   |            | Kim                  |
| Jimin       |            | Kim                  |
| Jong Hak    |            | Kim                  |
| Jong-Ho     |            | Kim                  |
| Jongwon     |            | Kim                  |
| Joonghan    |            | Kim                  |
| Min-Gyu     |            | Kim                  |
| Moon Il     |            | Kim                  |
| Mun Ho      |            | Kim                  |
| Nam Hoon    |            | Kim                  |
| Seung-Hwan  |            | Kim                  |
| Tae Young   |            | Kim                  |
| Youn Sang   |            | Kim                  |
| Yun-Hi      |            | Kim                  |
| Hui-Seon    |            | Kim                  |
| Eunyoung    |            | Kim                  |
| Kyung Bo    |            | Kim                  |
| Yeonhoo     |            | Kim                  |
| Yoonseob    |            | Kim                  |
| Young-Kee   |            | Kim                  |
| Marc        | C.         | Kimber               |
| Scott       |            | Kimmins              |
| Y.          |            | Kimura               |
| Laurie      | A.         | King                 |
| David       | George Ian | Kingston             |
| Calum       |            | Kinnear              |
| Karita      |            | Kinnunen-Raudaskoski |
| Tamara      | L.         | Kinzer-Ursem         |
| Mitsuo      |            | Kira                 |
| Thomas      |            | Kirchartz            |
| Karl        |            | Kirchner             |
| Barbara     |            | Kirchner             |
| Alexander   | M.         | Kirillov             |



|             |          |               |
|-------------|----------|---------------|
| Stewart     | Brian    | Kirton        |
| Ravi        |          | Kishore       |
| Hiroshi     |          | Kitagawa      |
| Hiromi      |          | Kitano        |
| Takuya      |          | Kitaoka       |
| Yuri S.     |          | Kivshar       |
| Miguel      |          | Kiwi          |
| John        |          | Kiwi          |
| Kensuke     |          | Kiyokawa      |
| Henrik Grum |          | Kjaergaard    |
| Signe       |          | Kjelstrup     |
| Thomas      | Matthias | Klapoetke     |
| Rebekka     | S.       | Klausen       |
| Marlise     |          | Klein         |
| Freddy      |          | Kleitz        |
| Andrzej     |          | Kloczkowski   |
| Andrey      | S.       | Klymchenko    |
| Marc        | R.       | Knecht        |
| Mato        |          | Knez          |
| Dietmar     |          | Knopp         |
| Gerhard     |          | Knothe        |
| Chi-Chiu    |          | Ko            |
| Seung Hwan  |          | Ko            |
| Kensei      |          | Kobayashi     |
| Motoyasu    |          | Kobayashi     |
| Yoji        |          | Kobayashi     |
| Marijan     |          | Kočevar       |
| Pierre      |          | Koch          |
| Thomas      |          | Kodadek       |
| Kensaku     |          | Kodama        |
| Nobuhiro    |          | Kodama        |
| Tadanori    |          | Koga          |
| Dong-Yeun   |          | Koh           |
| Katherine   |          | Koh           |
| Chung-Yan   |          | Koh           |
| Jennifer    | J.       | Kohler        |
| Michinari   |          | Kohri         |
| Toshio      |          | Koizumi       |
| Vanja       | V.       | Kokol         |
| Govind      | Bhagwan  | Kolekar       |
| Roman       | P.       | Kolmykov      |
| Joanna      |          | Kolny-Olesiak |
| Anatoly     | B.       | Kolomeisky    |
| Kimihiro    |          | Komeyama      |
| Hiroshi     |          | Kominami      |
| Mykhailo    | O.       | Kompanets     |
| Mizuho      |          | Kondo         |
| Takahiro    |          | Kondo         |

|             |             |                |
|-------------|-------------|----------------|
| Evgenii     | V.          | Kondratenko    |
| Rik         | Rani        | Koner          |
| Deling      |             | Kong           |
| De-Ming     |             | Kong           |
| Jie         |             | Kong           |
| Hiroyuki    |             | Konno          |
| Michalis    | I.          | Konsolakis     |
| Nikolaos    |             | Kontoudakis    |
| Eero        |             | Kontturi       |
| Chong Min   |             | Koo            |
| Jacek       |             | Koput          |
| Konstantin  | G.          | Kornev         |
| Alexander   |             | Kornienko      |
| Alexander   | M.          | Korsunsky      |
| Ali         |             | Koşar          |
| Sergei      | Victorovich | Kostjuk        |
| Eleftherios |             | Koufakis       |
| Panayiotis  | A.          | Koutentis      |
| Kristin     |             | Koutmou        |
| Andreas     | D.          | Koutselos      |
| Volodymyr   | I.          | Kovalchuk      |
| Andrey      | Y.          | Kovalevsky     |
| Michihisa   |             | Koyama         |
| Christopher | M.          | Kozak          |
| Frank       |             | Kozielski      |
| Teresa      |             | Kral           |
| Larissa     |             | Krasnova       |
| Anna        |             | Krawczuk       |
| Mohamed     |             | Kreir          |
| Alain       |             | Krief          |
| G.          |             | Krishnamoorthy |
| Roland      |             | Kröger         |
| Robin       | E.          | Kroon          |
| Jacob       | S.          | Kruger         |
| Michal      |             | Kruk           |
| Ulrich      | J.          | Krull          |
| Reddithota  | J.          | Krupadam       |
| Maciej      |             | Krzywiecki     |
| Xiaoyu      |             | Kuang          |
| James       | David       | Kubicki        |
| Wakana      |             | Kubo           |
| Kamil       |             | Kuca           |
| Jiri        |             | Kucerik        |
| Krzysztof   |             | Kuciński       |
| Dirk        |             | Kuckling       |
| Kazuaki     |             | Kudo           |
| Shinji      |             | Kudo           |
| John        | N.          | Kuhn           |

|                 |          |                  |
|-----------------|----------|------------------|
| Tapas           |          | Kuila            |
| Marina          | K.       | Kuimova          |
| Joanna          |          | Kujawa           |
| Shrikant        |          | Kukreti          |
| Aruna           |          | Kukrety          |
| Sinan           |          | Kul              |
| G. U.           |          | Kulkarni         |
| Chandramouli    |          | Kulshreshtha     |
| Manoj           |          | Kumar            |
| Niranjan        |          | Kumar            |
| Pradeep         |          | Kumar            |
| Pramod          |          | Kumar            |
| Rajender        |          | Kumar            |
| Ravindra        |          | Kumar            |
| Sandeep         |          | Kumar            |
| Sangit          |          | Kumar            |
| Vaijayanti      | A.       | Kumar            |
| Vipan           |          | Kumar            |
| Anil            |          | Kumar            |
| Penmetcha       | K. R.    | Kumar            |
| Raman           |          | Kumar            |
| Nitish          |          | Kumar            |
| Vijay           |          | Kumar            |
| Praveen         |          | Kumar Dubey      |
| Neeraj          | Ratnakar | Kumbhakarna      |
| Santanu         |          | Kundu            |
| Hank            | F.       | Kung             |
| Julia           |          | Kunze-Liebhäuser |
| Shiao-Wei       |          | Kuo              |
| Mahaveer        |          | Kurkuri          |
| Takashi         |          | Kuroda           |
| Akio            |          | Kuroda           |
| Takashi         |          | Kuroiwa          |
| Tibor           |          | Kurtán           |
| Mark            | J.       | Kurth            |
| Sabine          |          | Kuss             |
| Jörg            | P.       | Kutter           |
| Serdar          |          | Kuyucak          |
| Anton           |          | Kuzyk            |
| Il Keun         |          | Kwon             |
| Joanne Kyung-Ah |          | Kwon             |
| Christophe      |          | Labbez           |
| Nitin           | K.       | Labhasetwar      |
| João            | António  | Labrincha        |
| Marie-Aleth     |          | Lacaille-Dubois  |
| Nelisa Turkoglu |          | Lacin            |
| Peter           | M.       | Lackie           |
| Joerg           |          | Laeuger          |

|            |            |                  |
|------------|------------|------------------|
| Carlos     |            | Lafuente         |
| Florence   |            | Lagarde          |
| François   |            | Lagugn -Labarthe |
| Istvan     |            | Lagzi            |
| Mayurika   |            | Lahiri           |
| Yuekun     |            | Lai              |
| Chin Wei   |            | Lai              |
| James      |            | Lai              |
| Richard    | M.         | Laine            |
| Mic        |            | Lajiness         |
| Noemie     |            | Lalaoui          |
| Kwok Ho    |            | Lam              |
| Clemens    |            | Lamberth         |
| Monica     | Hitchcock  | Lamm             |
| Koop       |            | Lammertsma       |
| Senentxu   |            | Lanceros-M ndez  |
| Meidong    |            | Lang             |
| Wan-Zhong  |            | Lang             |
| Michael    |            | Lang             |
| Gy z       | G.         | L ng             |
| Dirk       |            | Lange            |
| Ravi       | Shankar    | Lankalapalli     |
| Yves       |            | Lansac           |
| Lisa       | J.         | Lapidus          |
| Oleg       | V.         | Larionov         |
| Joulia     |            | Larionova        |
| Anna       |            | Laromaine        |
| Silvina    |            | Larr n           |
| Kim        | Lambertsen | Larsen           |
| Sabine     |            | Laschat          |
| Dattatray  | J.         | Late             |
| Alessandro |            | Latini           |
| Alessandra |            | Lattanzi         |
| Tai-Chu    |            | Lau              |
| Stefan     | A.         | Laufer           |
| Charles    | A.         | Laughton         |
| Tomi       |            | Laurila          |
| Michele    |            | Laus             |
| H l ne     |            | Lavanant         |
| Garry      |            | Laverty          |
| Rodolfo    |            | Lavilla          |
| Buddhadev  |            | Layek            |
| Giuseppe   |            | Lazzara          |
| Tangui     |            | Le Bahers        |
| Sylvain    |            | Le Gall          |
| Alan       |            | Le Goff          |
| Boris      |            | Le Guennic       |
| Cecilia    |            | Leal             |

|              |     |            |
|--------------|-----|------------|
| Mikhail      | V.  | Lebedev    |
| Roger        | M.  | Leblanc    |
| Chi-Sing     |     | Lee        |
| Vladimir     | Ya. | Lee        |
| Byoung Hun   |     | Lee        |
| Byung Chul   |     | Lee        |
| Chil Won     |     | Lee        |
| Chul-Ho      |     | Lee        |
| Dong-Weon    |     | Lee        |
| Haeshin      |     | Lee        |
| Jae W.       |     | Lee        |
| Jaesang      |     | Lee        |
| Jin Hong     |     | Lee        |
| Jong Hyeon   |     | Lee        |
| Jong-Chan    |     | Lee        |
| Jongho       |     | Lee        |
| Junseop      |     | Lee        |
| Kwan Hyi     |     | Lee        |
| Nae-Eung     |     | Lee        |
| Sang Uck     |     | Lee        |
| See Hoon     |     | Lee        |
| Seung Geol   |     | Lee        |
| Sungho       |     | Lee        |
| Sunwoo       |     | Lee        |
| Yan          |     | Lee        |
| Yong Rok     |     | Lee        |
| Young-Chul   |     | Lee        |
| Chengkuo     |     | Lee        |
| Jong-Min     |     | Lee        |
| Jiun-Haw     |     | Lee        |
| Mei-Hwa      |     | Lee        |
| Tu           |     | Lee        |
| Tzong-Shyuan |     | Lee        |
| A.           | F.  | Lee        |
| Min          |     | Lee        |
| Gyu          |     | Leem       |
| Matthias     |     | Lehr       |
| Wei          |     | Lei        |
| Zhibin       |     | Lei        |
| Yong         |     | Lei        |
| Kin Fong     |     | Lei        |
| Angel        |     | Leiva      |
| Kurt         |     | Lejaeghere |
| Justin       | A.  | Lemkul     |
| Andreas      |     | Lemmerer   |
| Christopher  | M.  | Lemon      |
| M.A.N.D.A.   |     | Lemos      |
| Abraham      | M.  | Lenhoff    |

|            |      |                  |
|------------|------|------------------|
| Bertrand   |      | Lenoir           |
| Loredana   |      | Leone            |
| Chanel     | F.   | Leong            |
| David      | Tai  | Leong            |
| Alessandra | C.   | Leri             |
| Yann       | R.   | Leroux           |
| Vladimir   |      | Lesnyak          |
| Roman      |      | Lesyk            |
| William    |      | Levason          |
| Nicole     |      | Levi-Polyachenko |
| Wiktor     |      | Lewandowski      |
| Michael    | Adam | Lewis            |
| Jing-Liang |      | Li               |
| Wenyi      |      | Li               |
| Feng       |      | Li               |
| Yuning     |      | Li               |
| An         |      | Li               |
| Baoshan    |      | Li               |
| Benxia     |      | Li               |
| Bin        |      | Li               |
| Bin        |      | Li               |
| Bin        |      | Li               |
| Chang Ming |      | Li               |
| Changbiao  |      | Li               |
| Changping  |      | Li               |
| Changzhi   |      | Li               |
| Cheng      |      | Li               |
| Chilin     |      | Li               |
| Chuanbo    |      | Li               |
| Chuncheng  |      | Li               |
| Chunyi     |      | Li               |
| Chunzhong  |      | Li               |
| Dabing     |      | Li               |
| Dan        |      | Li               |
| Da-Wei     |      | Li               |
| Di         |      | Li               |
| Fangbai    |      | Li               |
| Feng       |      | Li               |
| Feng       |      | Li               |
| Fushan     |      | Li               |
| Fuwei      |      | Li               |
| Gao        |      | Li               |
| Gao-Ren    |      | Li               |
| Guangming  |      | Li               |
| Guangshe   |      | Li               |
| Guohui     |      | Li               |
| Guoqiang   |      | Li               |
| Haitao     |      | Li               |

|           |  |    |
|-----------|--|----|
| Haoran    |  | Li |
| Hong      |  | Li |
| Hong-Xi   |  | Li |
| Hongxiang |  | Li |
| Huaming   |  | Li |
| Hui-Jing  |  | Li |
| Huili     |  | Li |
| Jian      |  | Li |
| Jian      |  | Li |
| Jian-Feng |  | Li |
| Jian-Rong |  | Li |
| Jiansheng |  | Li |
| Jianshu   |  | Li |
| Jiaxing   |  | Li |
| Jingbo    |  | Li |
| Jinghong  |  | Li |
| Jinhui    |  | Li |
| Jiusu     |  | Li |
| Juan      |  | Li |
| Juan      |  | Li |
| Junjian   |  | Li |
| Liang     |  | Li |
| Liang     |  | Li |
| Liangbin  |  | Li |
| Libo      |  | Li |
| Lidong    |  | Li |
| Mei       |  | Li |
| Mengshan  |  | Li |
| Ming      |  | Li |
| Mingtao   |  | Li |
| Mingzhu   |  | Li |
| Nan       |  | Li |
| Ning      |  | Li |
| Pengfei   |  | Li |
| Qinghua   |  | Li |
| Qingyu    |  | Li |
| Qihong    |  | Li |
| Shengkun  |  | Li |
| Shouhai   |  | Li |
| Shunfang  |  | Li |
| Shunxing  |  | Li |
| Wei       |  | Li |
| Wei       |  | Li |
| Wei       |  | Li |
| Weijun    |  | Li |
| Wen-Cui   |  | Li |
| Wenzhi    |  | Li |
| Xi        |  | Li |

|              |    |    |
|--------------|----|----|
| Xiang        |    | Li |
| Xianggao     |    | Li |
| Xianhua      |    | Li |
| Xiao         |    | Li |
| Xiaofeng     |    | Li |
| Xifei        |    | Li |
| Xin          |    | Li |
| Xinyong      |    | Li |
| Xiujie       |    | Li |
| Xuehui       |    | Li |
| Yan-Ling     |    | Li |
| Yexin        |    | Li |
| Yi           |    | Li |
| Yi           |    | Li |
| Yiqun        |    | Li |
| Yongguang    |    | Li |
| Yong-Hua     |    | Li |
| Yong-Qing    |    | Li |
| Yongsheng    |    | Li |
| Yuntao       |    | Li |
| Zhaosheng    |    | Li |
| Zhaoyang     |    | Li |
| Zhen         |    | Li |
| Zhen         |    | Li |
| Zhibo        |    | Li |
| Zhicheng     |    | Li |
| Zhifang      |    | Li |
| Zhijie       |    | Li |
| Zhiping      |    | Li |
| Zhiwei       |    | Li |
| Zhonghao     |    | Li |
| Zhongjun     |    | Li |
| Zhong-Ming   |    | Li |
| Zhongshui    |    | Li |
| Zhuang       |    | Li |
| Zigang       |    | Li |
| Zi-Long      |    | Li |
| Yongjun      |    | Li |
| ChuangChuang |    | Li |
| Genxi        |    | Li |
| Guo-Gang     |    | Li |
| Junfa        |    | Li |
| Li-Li        |    | Li |
| Bai          |    | Li |
| Mai Suan     |    | Li |
| Elise        | Y. | Li |
| Bo           |    | Li |
| Fang         |    | Li |



|             |        |               |
|-------------|--------|---------------|
| Fanxing     |        | Li            |
| Hongmin     |        | Li            |
| Hong-yu     |        | Li            |
| Jack        |        | Li            |
| Junting     |        | Li            |
| Quan        |        | Li            |
| Wei         |        | Li            |
| Ying        |        | Li            |
| Yi-Pei      |        | Li            |
| Zheng       |        | Li            |
| Lin         |        | Li            |
| Lingjun     |        | Li            |
| Hong-zhen   |        | Lian          |
| Aihui       |        | Liang         |
| Guodong     |        | Liang         |
| Hongbin     |        | Liang         |
| Peng        |        | Liang         |
| WanZhen     |        | Liang         |
| Yeru        |        | Liang         |
| Yong        |        | Liang         |
| Yongri      |        | Liang         |
| Panagiotis  |        | Lianos        |
| Li          |        | Liao          |
| Rong-Zhen   |        | Liao          |
| Shijun      |        | Liao          |
| Xuebin      |        | Liao          |
| Xue-Pin     |        | Liao          |
| Yaozu       |        | Liao          |
| Wei-Ssu     |        | Liao          |
| Ying-Chih   |        | Liao          |
| Dennis      | L.     | Lichtenberger |
| Sven        |        | Lidin         |
| Joel        | F.     | Liebman       |
| Vincent     |        | Liégeois      |
| Peter       |        | Lievens       |
| Galina      | N.     | Likhatskaya   |
| Peter       |        | Liljeroth     |
| Linda       | B. L.  | Lim           |
| Dong-Kwon   |        | Lim           |
| Hyuneui     |        | Lim           |
| Yeong-Gweon |        | Lim           |
| Yong-beom   |        | Lim           |
| Yoongho     |        | Lim           |
| Fabio       | H. B.  | Lima          |
| João        | Carlos | Lima          |
| Bizhou      |        | Lin           |
| Dunmin      |        | Lin           |
| He          |        | Lin           |

|              |        |           |
|--------------|--------|-----------|
| Hengwei      |        | Lin       |
| Jiaping      |        | Lin       |
| Jin-Ming     |        | Lin       |
| Jun          |        | Lin       |
| Qi           |        | Lin       |
| Shaoliang    |        | Lin       |
| Yi           |        | Lin       |
| Yuqing       |        | Lin       |
| Zhan         |        | Lin       |
| Zian         |        | Lin       |
| Haiqiang     |        | Lin       |
| Carol Sze Ki |        | Lin       |
| Nian         |        | Lin       |
| Ming         |        | Lin       |
| Cheng-Huang  |        | Lin       |
| Chih-Kai     |        | Lin       |
| Hsin-Chieh   |        | Lin       |
| Jung-Hsin    |        | Lin       |
| Ming-Hsien   |        | Lin       |
| Shawn        | D.     | Lin       |
| Yu-Chuan     |        | Lin       |
| Jiann        |        | Lin       |
| Feng         |        | Lin       |
| Haiqing      |        | Lin       |
| Jian         |        | Lin       |
| Juan         |        | Lin       |
| Ming-Chan    |        | Lin       |
| Pao Tai      |        | Lin       |
| Rui-Biao     |        | Lin       |
| Zhiqing      |        | Lin       |
| Zhiqun       |        | Lin       |
| Ruoqian      |        | Lin       |
| Mikael       |        | Lindgren  |
| Anders       | T.     | Lindhardt |
| Erno         |        | Lindner   |
| Craig        | W.     | Lindsley  |
| Jun          |        | Ling      |
| Yihan        |        | Ling      |
| Tau-Chuan    |        | Ling      |
| Dennis       |        | Linton    |
| Ewelina      |        | Lipiec    |
| Darren       | J.     | Lipomi    |
| Bernhard     |        | Lippert   |
| Thomas       | K.     | Lippert   |
| Alexander    | R.     | Lippert   |
| Bruce        | H.     | Lipshutz  |
| Nicola       |        | Lisi      |
| Tedd         | Edward | Lister    |

|            |  |        |
|------------|--|--------|
| Lucio      |  | Litti  |
| R. Daniel  |  | Little |
| Porun      |  | Liu    |
| Hao        |  | Liu    |
| Juewen     |  | Liu    |
| Anran      |  | Liu    |
| Bo         |  | Liu    |
| Bo         |  | Liu    |
| Cai-Ming   |  | Liu    |
| Chang-Jun  |  | Liu    |
| Changwei   |  | Liu    |
| Chenghui   |  | Liu    |
| Chengsheng |  | Liu    |
| Chen-Yang  |  | Liu    |
| Chun       |  | Liu    |
| Chun-Sen   |  | Liu    |
| Chuntai    |  | Liu    |
| Congcong   |  | Liu    |
| Daqing     |  | Liu    |
| Fa-Qian    |  | Liu    |
| Fengmin    |  | Liu    |
| Gang       |  | Liu    |
| Guangming  |  | Liu    |
| Guixia     |  | Liu    |
| Guoming    |  | Liu    |
| Haifeng    |  | Liu    |
| Haifeng    |  | Liu    |
| Hao        |  | Liu    |
| Hong       |  | Liu    |
| Hongbin    |  | Liu    |
| Hong-Ke    |  | Liu    |
| Hongling   |  | Liu    |
| Hongyun    |  | Liu    |
| Hu         |  | Liu    |
| Huarong    |  | Liu    |
| Huijun     |  | Liu    |
| Jian       |  | Liu    |
| Jiaqi      |  | Liu    |
| Jinbin     |  | Liu    |
| Jin-Gang   |  | Liu    |
| Junshan    |  | Liu    |
| Kun        |  | Liu    |
| Lei        |  | Liu    |
| Li         |  | Liu    |
| Lizhe      |  | Liu    |
| Meiya      |  | Liu    |
| Minghua    |  | Liu    |
| Mingyan    |  | Liu    |

|             |  |     |
|-------------|--|-----|
| Pan-Bo      |  | Liu |
| Pan-Pan     |  | Liu |
| Qian        |  | Liu |
| Qing Lin    |  | Liu |
| Qingyun     |  | Liu |
| Shanshan    |  | Liu |
| Simin       |  | Liu |
| Songqin     |  | Liu |
| Tianxi      |  | Liu |
| Weimin      |  | Liu |
| Xiang       |  | Liu |
| Xiangyu     |  | Liu |
| Xianhua     |  | Liu |
| Xiaobo      |  | Liu |
| Xiaoheng    |  | Liu |
| Xiao-Qin    |  | Liu |
| Xiaoqing    |  | Liu |
| Xiaoyan     |  | Liu |
| Xin         |  | Liu |
| Xin         |  | Liu |
| Xin-Yuan    |  | Liu |
| Xizheng     |  | Liu |
| Yaling      |  | Liu |
| Ying Dan    |  | Liu |
| Yingliang   |  | Liu |
| Yingliang   |  | Liu |
| You-Nian    |  | Liu |
| Yu          |  | Liu |
| Yueming     |  | Liu |
| Yunling     |  | Liu |
| Yunqi       |  | Liu |
| Yunyun      |  | Liu |
| Yutang      |  | Liu |
| Zai-Qun     |  | Liu |
| Zhao-Peng   |  | Liu |
| Zhaoyue     |  | Liu |
| Zhe         |  | Liu |
| Zhengqi     |  | Liu |
| Zhiqiang    |  | Liu |
| Zhiwei      |  | Liu |
| Zhuang      |  | Liu |
| Zitong      |  | Liu |
| Zong-Huai   |  | Liu |
| Jian        |  | Liu |
| Limin       |  | Liu |
| Yuyu        |  | Liu |
| Bin         |  | Liu |
| Shiuh-Tzung |  | Liu |

|                   |                 |                |
|-------------------|-----------------|----------------|
| Ying-Ling         |                 | Liu            |
| Zhen-Shu          |                 | Liu            |
| Ting-Yu           |                 | Liu            |
| Huiyun            |                 | Liu            |
| Yan               |                 | Liu            |
| Jian              |                 | Liu            |
| Jianhua           |                 | Liu            |
| Peng              |                 | Liu            |
| Shuai             |                 | Liu            |
| Shubin            |                 | Liu            |
| Yi-Ming           |                 | Liu            |
| Zhen-Fei          |                 | Liu            |
| Luis              | M.              | Liz-Marzán     |
| Agusti            |                 | Lledos         |
| Jordi             |                 | Llop           |
| Juan Antonio      |                 | Llorens        |
| Guy               | C.              | Lloyd-Jones    |
| María Jesús       |                 | Lobo-Castañón  |
| Matthew           | Ryen            | Lockett        |
| Carlos            |                 | Lodeiro        |
| Michael           | W.              | Lodewyk        |
| Watson            |                 | Loh            |
| Patrick           | J.              | Loll           |
| Liliane           | Maria Ferrareso | Lona           |
| Mengqiu           |                 | Long           |
| Yi-Tao            |                 | Long           |
| Yi                |                 | Long           |
| Timothy           | E.              | Long           |
| Jonathon          |                 | Long           |
| Marjorie          | L.              | Longo          |
| Joseph            | A.              | Loo            |
| Rachel            | R. Ogorzalek    | Loo            |
| Katja             |                 | Loos           |
| Norberto          | Peporine        | Lopes          |
| Eduardo           |                 | Lopez          |
| Nuria             |                 | Lopez          |
| Steven            | A.              | Lopez          |
| Roser             |                 | López-Alemaný  |
| Luisa Carlota     |                 | Lopez-Cara     |
| M. Arturo         |                 | Lopez-Quintela |
| Roman             |                 | Lopez-Sandoval |
| Florentino        |                 | Lopez-Urias    |
| Przemyslaw        |                 | Los            |
| Xinhui            |                 | Lou            |
| Xiong Wen (David) |                 | Lou            |
| Eugen             |                 | Lounkine       |
| Ricardo           | O.              | Louro          |
| M. Carmen         |                 | Louzao         |

|            |    |          |
|------------|----|----------|
| Sharon     | M. | Loverde  |
| Derek      | R. | Lovley   |
| Philip     | S. | Low      |
| Christian  |    | Löw      |
| John       |    | Lowe     |
| Marek      |    | Lozynski |
| Qingye     |    | Lu       |
| Ang        |    | Lu       |
| Chao       |    | Lu       |
| Conghua    |    | Lu       |
| Guowei     |    | Lu       |
| Haibao     |    | Lu       |
| Hongbo     |    | Lu       |
| Hua        |    | Lu       |
| Hua        |    | Lu       |
| Jian-Gang  |    | Lu       |
| Jianzhong  |    | Lu       |
| Jun        |    | Lu       |
| Lehui      |    | Lu       |
| Lu         |    | Lu       |
| Luhua      |    | Lu       |
| Ning       |    | Lu       |
| Ping       |    | Lu       |
| Qiang      |    | Lu       |
| Qifang     |    | Lu       |
| Qingyi     |    | Lu       |
| Ran        |    | Lu       |
| Shixiang   |    | Lu       |
| Wen-Zhong  |    | Lu       |
| Xiaolin    |    | Lu       |
| Xiaoquan   |    | Lu       |
| Yan        |    | Lu       |
| Zhengliang |    | Lu       |
| Zhouguang  |    | Lu       |
| Guo-Liang  |    | Lu       |
| Ming-Chun  |    | Lu       |
| Yao        |    | Lu       |
| Hui-Meng   |    | Lu       |
| Jun        |    | Lu       |
| Lin        |    | Lu       |
| Xinjun     |    | Luan     |
| Yi         |    | Luan     |
| William    | D. | Lubell   |
| Michael    |    | Lubwama  |
| Romain     |    | Lucas    |
| Claudio    |    | Luchinat |
| Richard    | F. | Luduena  |
| Ralf       |    | Ludwig   |

|             |           |           |
|-------------|-----------|-----------|
| Hendrik     |           | Luesch    |
| Santiago    | V.        | Luis      |
| Reidar      |           | Lund      |
| Suzanne     |           | Lunsford  |
| Cong        |           | Luo       |
| Hang        |           | Luo       |
| Jun         |           | Luo       |
| Laihui      |           | Luo       |
| Linbao      |           | Luo       |
| Qianfu      |           | Luo       |
| Sanzhong    |           | Luo       |
| Shenglian   |           | Luo       |
| Yonglan     |           | Luo       |
| Yue         |           | Luo       |
| Zhixun      |           | Luo       |
| Dahai       |           | Luo       |
| Shyh-Chyang |           | Luo       |
| Hongmei     |           | Luo       |
| Oleg        |           | Lupan     |
| Rafael      |           | Luque     |
| Christine   | K.        | Luscombe  |
| Jens        |           | Lütjohann |
| François    |           | Lux       |
| Adriaan     | Stephanus | Luyt      |
| Boguslawa   |           | Luzak     |
| Baoliang    |           | Lv        |
| Xiao-Jun    |           | Lv        |
| Xiaomeng    |           | Lv        |
| Xin         |           | Lv        |
| Yi          |           | Lv        |
| Fachuang    |           | Lv        |
| Yuri        | M.        | Lvov      |
| Ioannis     | N.        | Lykakis   |
| Jonathan    |           | Lyon      |
| L. Andrew   |           | Lyon      |
| Karthikeyan |           | M.        |
| Jun         |           | Ma        |
| Chonggeng   |           | Ma        |
| Gang        |           | Ma        |
| Hongzhu     |           | Ma        |
| Huimin      |           | Ma        |
| Longlong    |           | Ma        |
| Lu-Fang     |           | Ma        |
| Songqi      |           | Ma        |
| Wanhong     |           | Ma        |
| Wanli       |           | Ma        |
| Wei         |           | Ma        |
| Xinbin      |           | Ma        |

|           |            |                   |
|-----------|------------|-------------------|
| Yanwen    |            | Ma                |
| Zhanfang  |            | Ma                |
| Zhen      |            | Ma                |
| Zhijun    |            | Ma                |
| Wei       |            | Ma                |
| Dik-Lung  |            | Ma                |
| Xiao-Hua  |            | Ma                |
| Biwu      |            | Ma                |
| Lin       |            | Ma                |
| Minglin   |            | Ma                |
| Shengqian |            | Ma                |
| Yanxiao   |            | Ma                |
| Antonio   | A. L.      | Macanita          |
| Anastasia |            | Macario           |
| Antonio   |            | Macchiarulo       |
| Luis      | G.         | Macdowell         |
| Robert    | B.         | Macgregor         |
| Robert    | H.         | Mach              |
| Francisco | Bolivar C. | Machado           |
| Diana     |            | Machado           |
| Amilcar   |            | Machulek          |
| James     |            | Mack              |
| John      | B.         | MacMillan         |
| Duncan    | J.         | Macquarrie        |
| Giridhar  |            | Madras            |
| Lorean    |            | Madriz            |
| Chihiro   |            | Maeda             |
| Satoshi   |            | Maeda             |
| Tomohiro  |            | Maegawa           |
| Shinya    |            | Maenosono         |
| Micah     |            | Maetani           |
| Pitamber  |            | Mahanandia        |
| Arman     |            | Mahboubi Soufiani |
| Kalpana   |            | Maheria           |
| Wen-Peng  |            | Mai               |
| Gilberto  |            | Maia              |
| Pedro     | J.         | Maireles-Torres   |
| Debabrata |            | Maiti             |
| Prabal    | K.         | Maiti             |
| Souvik    |            | Maiti             |
| Debabrata |            | Maiti             |
| Uday      |            | Maitra            |
| Arghya    |            | Majee             |
| Samir     | K.         | Maji              |
| Tapas     | Kumar      | Maji              |
| Kowsar    |            | Majid             |
| Akira     |            | Makino            |
| Luis      | C.         | Malacarne         |



|              |       |                 |
|--------------|-------|-----------------|
| Bansi        | Dhar  | Malhotra        |
| Sanjay       | V.    | Malhotra        |
| Sawanta      |       | Mali            |
| Sudip        |       | Malik           |
| Cosimino     |       | Malitesta       |
| Talal        |       | Mallah          |
| Dibyendu     |       | Mallick         |
| Boris        |       | Malomed         |
| William      | A.    | Maltese         |
| Giulio       |       | Malucelli       |
| Nikhil       |       | Malvankar       |
| Oleksandr I. |       | Malyi           |
| Scott        |       | Manalis         |
| Ajay         |       | Mandal          |
| Sanjay       | K.    | Mandal          |
| Soumit       |       | Mandal          |
| Sukhendu     |       | Mandal          |
| Swadhin      | K.    | Mandal          |
| Abhirup      |       | Mandal          |
| Shyamapada   |       | Mandal          |
| Ganesan      |       | Mani            |
| Veerappan    |       | Mani            |
| Sivakumar    |       | Manickam        |
| Maidhily     |       | Manikandan      |
| A.           |       | Manikandan      |
| Bala         |       | Manimaran       |
| Tapas        | Kumar | Manna           |
| Arun         |       | Manna           |
| Vijay        |       | Mannari         |
| Takaaki      |       | Mano            |
| Muthiah      |       | Manoharan       |
| Kyriaki      |       | Manoli          |
| Theodoros    |       | Manouras        |
| Mohsen       |       | Mansouri        |
| Thomas       | A.    | Manz            |
| Blanca       | R.    | Manzano         |
| Jiang-Gao    |       | Mao             |
| Lanqun       |       | Mao             |
| Samuel       | S.    | Mao             |
| Yuanbing     |       | Mao             |
| Aristides    |       | Marcano         |
| Filipa       |       | Marcelo         |
| Delphine     |       | Marchon         |
| José         |       | Marco-Contelles |
| Alek         | V.    | Marenich        |
| Davor        |       | Margetic        |
| Kazi Hanium  |       | Maria           |
| Milan        |       | Maric           |

|             |       |                |
|-------------|-------|----------------|
| Maria Luisa |       | Marin          |
| Christopher | E.    | Marjo          |
| Bostjan     |       | Markelc        |
| Frank       |       | Marken         |
| Gordana     |       | Markovic       |
| Claudia     |       | Marques        |
| Isabel      | M.    | Marrucho       |
| Lluis       | F.    | Marsal         |
| Roland      |       | Marschall      |
| Ramon       |       | Marti          |
| Darren      | J.    | Martin         |
| Richard     | Alan  | Martin         |
| Eric        | J.    | Martin         |
| David       |       | Martin Alonso  |
| Ana         |       | Martinez       |
| Ramses      | V.    | Martinez       |
| Fleming     |       | Martínez       |
| Ramon       |       | Martinez-Manez |
| Marcos      | A. P. | Martins        |
| Alessandro  |       | Martucci       |
| Jan         | K.    | Marzinek       |
| Lorenzo     |       | Maschio        |
| Feliu       |       | Maseras        |
| Kazushi     |       | Mashima        |
| Jorge       | Cesar | Masini         |
| Thomas      |       | Maskow         |
| Enrico      |       | Masoero        |
| Tali        |       | Mass           |
| Antonio     |       | Massa          |
| Melissa     |       | Massey         |
| Eric        |       | Masson         |
| Sadahiro    |       | Masuo          |
| Aurelio     |       | Mateo-Alonso   |
| Mauricio    | G.    | Mateu          |
| Avtar       | Singh | Matharu        |
| Diane E.    |       | Mather         |
| Robert      | T.    | Mathers        |
| Leonidas    |       | Matsakas       |
| Go          |       | Matsuba        |
| Hiroki      |       | Matsubara      |
| Masaki      |       | Matsuda        |
| Takashi     |       | Matsuhira      |
| Noriyoshi   |       | Matsumi        |
| Takashi     |       | Matsuo         |
| Masaya      |       | Matsuoka       |
| Yuji        |       | Matsuya        |
| Cherif      | F.    | Matta          |
| Hans        |       | Matter         |

|             |         |                |
|-------------|---------|----------------|
| Gary        | R.      | Matyas         |
| Jörg        |         | Matysik        |
| Nuno        |         | Maulide        |
| Olivier     |         | Maury          |
| Robert      | C.      | Mawhinney      |
| Thomas      | P.      | Mawhinney      |
| Anthony     |         | Maxwell        |
| Steven J.   |         | May            |
| Sundar      |         | Mayavan        |
| John        | Philip  | Mayer          |
| Torsten     |         | Mayr           |
| Shivnath    |         | Mazumder       |
| Raffaello   |         | Mazzaro        |
| Ian         | T.      | McCrum         |
| Leah        | R.      | McEwen         |
| Eoghan      | M.      | McGarrigle     |
| Paul        | R.      | McGonigal      |
| David       |         | McKay          |
| Neil        | B.      | McKeown        |
| Gareth      | H.      | McKinley       |
| Robert      | J.      | McMahon        |
| Adam        |         | Mechler        |
| Maurice     |         | Medebielle     |
| Andrew      | J.      | Medford        |
| Babu        |         | Medi           |
| Manuel      | Eusebio | Medina         |
| Jose Luis   |         | Medina-Franco  |
| Mercedes    |         | Medio-Simon    |
| Raghavender |         | Medishetty     |
| Stephen     | R.      | Meech          |
| Sabine      |         | Mehay          |
| Majid       |         | Mehrabi Mazidi |
| Qingsong    |         | Mei            |
| Ye          |         | Mei            |
| Yongfeng    |         | Mei            |
| Jordan      | L.      | Meier          |
| Mark        | W       | Meisel         |
| Christian   |         | Melander       |
| Artem       |         | Melman         |
| Maria João  |         | Melo           |
| Manuela     |         | Melucci        |
| Yves        |         | Mély           |
| Fanli       |         | Meng           |
| Qinghan     |         | Meng           |
| Xiangju     |         | Meng           |
| Huan        |         | Meng           |
| Xiangbo     |         | Meng           |
| Ayfer       |         | Mentes         |

|            |          |                  |
|------------|----------|------------------|
| Kibret     |          | Mequanint        |
| Venkataram |          | Mereddy          |
| Gabriel    |          | Merino           |
| Pablo      |          | Merino           |
| Pedro      |          | Merino           |
| Bradley    | L.       | Merner           |
| Christian  |          | Merten           |
| Pratima    |          | Meshram          |
| Angela     |          | Messina          |
| Oender     |          | Metin            |
| Ezzeldin   |          | Metwalli         |
| Kristen    |          | Metzler-Wilson   |
| Meyya      |          | Meyyappan        |
| Raffaele   |          | Mezzena          |
| Hao-Yang   |          | Mi               |
| Jianli     |          | Mi               |
| Krystian   |          | Miazek           |
| Adonis     |          | Michaelides      |
| Jeremy     | J.       | Michalek         |
| Veronique  |          | Michaud          |
| Carlos     | R.       | Michel           |
| Tsuyoshi   |          | Michinobu        |
| Laurent    |          | Micouin          |
| John       | R.       | Miecznikowski    |
| Jerzy      | Wojciech | Mietelski        |
| Evelyne    |          | Migianu-Griffoni |
| Agostino   |          | Migliore         |
| Alice      |          | Mija             |
| Konstantin | N.       | Mikhelson        |
| Damian     |          | Mikulski         |
| Danilo     |          | Milardi          |
| Ognjen     | Š.       | Miljanić         |
| Reinhard   |          | Miller           |
| Duane      | D.       | Miller           |
| Grover     | Paul     | Miller           |
| Oscar      |          | Millet           |
| Graeme     |          | Milligan         |
| M.         |          | Millot           |
| Sun-Joon   |          | Min              |
| Yujia      |          | Min              |
| Yasunori   |          | Minami           |
| Tohru      |          | Minamino         |
| Takeo      |          | Minari           |
| Claudio    |          | Minero           |
| David      | D. L.    | Minh             |
| Shelley    | D.       | Minteer          |
| Svetlana   |          | Mintova          |
| Ruslan     | M.       | Minyaev          |

|               |              |                |
|---------------|--------------|----------------|
| Mohammad      | Hedayetullah | Mir            |
| Alan          |              | Miralrio       |
| Andrey E.     |              | Miroshnichenko |
| Rajesh        |              | Mishra         |
| Yogendra      | Kumar        | Mishra         |
| Satyendra     | Kumar        | Mishra         |
| Anil          | Kumar        | Mishra         |
| Monalisa      |              | Mishra         |
| Nand Lal      |              | Mishra         |
| Rupesh        | Kumar        | Mishra         |
| Manjusri      |              | Misra          |
| Rajneesh      |              | Misra          |
| Drake         | C.           | Mitchell       |
| Soma          |              | Mitra          |
| Mico          | M.           | Mitrovic       |
| Ryoji         |              | Mitsuhashi     |
| Ayori         |              | Mitsutake      |
| Sandeep       |              | Mittal         |
| Hemant        |              | Mittal         |
| Vitaly        | Sergeevich   | Mityanov       |
| Tomoya        |              | Miura          |
| Youhei        |              | Miura          |
| Hisashi       |              | Miyagawa       |
| Daigo         |              | Miyajima       |
| Garret        | M.           | Miyake         |
| Manabu        |              | Miyamoto       |
| Hiroshi       |              | Miyasaka       |
| Kenji         |              | Miyatake       |
| Kunimasa      |              | Miyazaki       |
| Kazuhiko      |              | Mizuno         |
| Grzegorz      |              | Mloston        |
| Ran           |              | Mo             |
| Yirong        |              | Mo             |
| Mohammad      |              | Mobin          |
| Shaikh        | M.           | Mobin          |
| David         | L.           | Mobley         |
| Justin        |              | Mobley         |
| T. Andrew     |              | Mobley         |
| Benjamin      | C.           | Moeller        |
| Andreas       |              | Möglich        |
| Hassan        |              | Mohamed Hassan |
| Omidreza      |              | Mohammadzadeh  |
| S.            |              | Mohana Roopan  |
| Jyotirmayee   |              | Mohanty        |
| Vijayanand S. |              | Moholkar       |
| Syed Majid    |              | Mohseni        |
| Hyejung       |              | Mok            |
| Robert        |              | Mokaya         |

|                  |                |                  |
|------------------|----------------|------------------|
| Paula            |                | Moldenaers       |
| Vicent           |                | Moliner          |
| Mark             | Gerard         | Moloney          |
| David            |                | Monchaud         |
| Subrata          |                | Mondal           |
| Maura            |                | Monduzzi         |
| Eric             |                | Monflier         |
| Yasunari         |                | Monguchi         |
| Guillaume        |                | Monier           |
| Florian          |                | Monnier          |
| Guillermo        |                | Monrós           |
| Fabio            |                | Montagnaro       |
| Jose-Maria       |                | Montenegro       |
| Donato           |                | Monti            |
| Byeong Cheol     |                | Moon             |
| Jun Hyuk         |                | Moon             |
| Robert           | B.             | Moore            |
| Jarugu           | Narasimha      | Moorthy          |
| Fatemeh          |                | Moosavi          |
| Ahmad Reza       |                | Moosavi-Zare     |
| Alexandre        |                | Moquin           |
| Mahmoud          |                | Moradi           |
| Marli            | Leite de       | Moraes           |
| Kenichi          |                | Moragaki         |
| Ana              |                | Morales          |
| Gabriel          |                | Morales          |
| María del Puerto |                | Morales          |
| Emilia           |                | Morallon         |
| Maria            | C.             | Moreno-Bondi     |
| Alexander        | B.             | Morgan           |
| Mattia           |                | Mori             |
| Shogo            |                | Mori             |
| Tadashi          |                | Mori             |
| Toshihiro        |                | Moriga           |
| Hiroshi          |                | Morikawa         |
| Toshio           |                | Morikawa         |
| Hisatoyo         |                | Morinaga         |
| Alexey           |                | Morozov          |
| Finlay           | D.             | Morrison         |
| Calum            |                | Morrison         |
| Janet            | Ruth           | Morrow           |
| Bohayra          |                | Mortazavi        |
| Monika           |                | Mortimer         |
| Francois         |                | Morvan           |
| Paulraj          |                | Mosae Selvakumar |
| Valeri           | V.             | Mossine          |
| Claudio          | José De Araujo | Mota             |
| Mohammad Hassan  | M. H.          | Motaghedifard    |

|             |        |               |
|-------------|--------|---------------|
| Kasper      |        | Moth-Poulsen  |
| Suguru      |        | Motokucho     |
| Ken         |        | Motokura      |
| Chung-Yuan  |        | Mou           |
| Satya       | Priya  | Moulik        |
| Stefanos    |        | Mourdikoudis  |
| Fathi       |        | Moussa        |
| Sergio      | E.     | Moya          |
| Kamel       |        | Msaada        |
| Shichun     |        | Mu            |
| Tiancheng   |        | Mu            |
| Linqin      |        | Mu            |
| Hubert      |        | Muchalski     |
| Anja-Verena |        | Mudring       |
| Jon         | I.     | Mujika        |
| Kazuhiko    |        | Mukai         |
| Arnab       |        | Mukherjee     |
| Debaraj     |        | Mukherjee     |
| Raju        |        | Mukherjee     |
| Saptarshi   |        | Mukherjee     |
| Chandan     |        | Mukherjee     |
| Arijit      |        | Mukherjee     |
| Indrajit    |        | Mukhopadhyay  |
| Kasturi     |        | Mukhopadhyay  |
| Pritam      |        | Mukhopadhyay  |
| Rupa        |        | Mukhopadhyay  |
| Samrat      |        | Mukhopadhyay  |
| R.          |        | Muleo         |
| Charles     | A.     | Mullen        |
| Thomas      | J.     | Mullen        |
| Jens        |        | Müller        |
| Susanne     |        | Müller        |
| Maurizio    |        | Muniz-Miranda |
| Edgar       |        | Muñoz         |
| Alvaro      |        | Muñoz-Castro  |
| Sebastián   |        | Muñoz-Guerra  |
| Andrew      | W.     | Munro         |
| Alberto     | P.     | Munuzuri      |
| Dominik     |        | Munz          |
| Daniel      | H.     | Murgida       |
| Sanehiro    |        | Muromachi     |
| Caroline    |        | Murphy        |
| John        | A.     | Murphy        |
| Keith       | S.     | Murray        |
| Michael     |        | Murray        |
| Ramaswamy   |        | Murugavel     |
| Dmitry      | Yu.    | Murzin        |
| Samir       | Hemant | Mushrif       |

|                 |         |                   |
|-----------------|---------|-------------------|
| Rita            |         | Muzzalupo         |
| Laurel          |         | Mydock-McGrane    |
| Santhanamoorthi |         | Nachimuthu        |
| Angshuman       |         | Nag               |
| Koji            |         | Nagahama          |
| Maria           | Colleen | Nagan             |
| Daisuke         |         | Nagao             |
| Ramakrishnan    |         | Nagaraj           |
| Ramanathan      |         | Nagarajan         |
| Ganesh          |         | Nagaraju          |
| Masanari        |         | Nagasaka          |
| Kenichi         |         | Nagase            |
| Yuki            |         | Nagata            |
| Bathini         |         | Nagendra Babu     |
| Stefan          |         | Nagl              |
| Fady            |         | Nahra             |
| Tricia          |         | Naicker           |
| Satish          | K.      | Nair              |
| Alireza         |         | Najafi Chermahini |
| Yoshinao        |         | Nakagawa          |
| Akito           |         | Nakagawa          |
| Tessui          |         | Nakagawa          |
| Kiyotaka        |         | Nakajima          |
| Takayuki        |         | Nakajima          |
| Hiroyuki        |         | Nakamura          |
| Yoshiaki        |         | Nakamura          |
| Seikou          |         | Nakamura          |
| Shuji           |         | Nakanishi         |
| Yoshiaki        |         | Nakao             |
| Takuya          |         | Nakashima         |
| Hiroshi         |         | Nakatsuji         |
| Manabu          |         | Nakazono          |
| Ki Tae          |         | Nam               |
| Chang-Yong      |         | Nam               |
| Irishi          | N. N.   | Namboothiri       |
| Junmin          |         | Nan               |
| Samik           |         | Nanda             |
| Bhanu           |         | Nandan            |
| Ashwini         |         | Nangia            |
| Takeshi         |         | Naota             |
| Joseph          | L.      | Napoli            |
| Ravin           |         | Narain            |
| Jerzy           |         | Narbutt           |
| Véronique       |         | Nardello-Rataj    |
| Shahzad         |         | Naseem            |
| Jamal           |         | Naser             |
| Habib           |         | Nasri             |
| Mahmoud         |         | Nasrollahzadeh    |



|                 |         |                    |
|-----------------|---------|--------------------|
| Upendra         |         | Natarajan          |
| Kathiresan      |         | Natarajan          |
| Mala            |         | Nath               |
| Manashi         |         | Nath               |
| Cristina        |         | Nativi             |
| Arvind          |         | Natu               |
| Sabita          |         | Nayak              |
| Leena           |         | Nebhani            |
| Stoyan          |         | Nedeltchev         |
| R.              | Jeffrey | Neitz              |
| Kazem           |         | Nejati             |
| Alexander       | V.      | Nemukhin           |
| Tina            | M.      | Nenoff             |
| Eugenie         |         | Nepovimova         |
| Bernaurdshaw    |         | Neppolian          |
| Giovanni        |         | Neri               |
| Dario           |         | Neri               |
| Dmitry          |         | Nerukh             |
| Brenno          | A. D.   | Neto               |
| Anil            | Narayan | Netravali          |
| Bernd           |         | Neumaier           |
| Sneha           |         | Neupane            |
| Susanne         |         | Neupert            |
| Pavel           |         | Neuzil             |
| David           |         | Newman             |
| Man-Fai         |         | Ng                 |
| Van A.          |         | Ngo                |
| Jun             |         | Ni                 |
| Xin-Long        |         | Ni                 |
| Yonghong        |         | Ni                 |
| Taco            |         | Nicolai            |
| P. V.           |         | Nidheesh           |
| Guangjun        |         | Nie                |
| Jun             |         | Nie                |
| Shibin          |         | Nie                |
| Zhou            |         | Nie                |
| Joanna          |         | Niedziółka-Jönsson |
| Kornelius       |         | Nielsch            |
| Carlos          |         | Nieto-Draghi       |
| Takuro          |         | Niidome            |
| Pablo Ivan      |         | Nikel              |
| Niklas          |         | Nilius             |
| Lennart         |         | Nilsson            |
| Raghumani Singh |         | Ningthoujam        |
| Yoshihiko       |         | Ninomiya           |
| Nahid           |         | Nishat             |
| Naoya           |         | Nishi              |
| Yoshiaki        |         | Nishibayashi       |

|             |          |             |
|-------------|----------|-------------|
| Jun-ichi    |          | Nishida     |
| Hiroto      |          | Nishihara   |
| Masaki      |          | Nishijima   |
| Keisuke     |          | Nishikawa   |
| Makiya      |          | Nishikawa   |
| Yoshihiro   |          | Nishimoto   |
| Tohru       |          | Nishinaga   |
| Takashi     |          | Nishino     |
| Takanori    |          | Nishioka    |
| Masayoshi   |          | Nishiura    |
| Yoshiharu   |          | Nishiyama   |
| Makoto      |          | Nishiyama   |
| Norikazu    |          | Nishiyama   |
| Takayuki    |          | Nishizaka   |
| Chunming    |          | Niu         |
| Dechao      |          | Niu         |
| Junfeng     |          | Niu         |
| Yuzhong     |          | Niu         |
| Zhiqiang    |          | Niu         |
| Xize        |          | Niu         |
| Helena      | I. S.    | Nogueira    |
| Thierry     |          | Noguer      |
| Michael     |          | Nolan       |
| Roeland     | J. M.    | Nolte       |
| Kotohiro    |          | Nomura      |
| Andre       |          | Nonat       |
| Santi       |          | Nonell      |
| Yoshiyuki   |          | Nonoguchi   |
| Louis       |          | Noodleman   |
| Małgorzata  |          | Norek       |
| Michael     |          | North       |
| Louis-Félix |          | Nothias     |
| Nataša      |          | Novak Tušar |
| Wieslaw     |          | Nowak       |
| Atara       |          | Ntekim      |
| Fabio       |          | Nudelman    |
| Youhei      |          | Numata      |
| Carla       | D.       | Nunes       |
| Jean-Marc   |          | Nuzillard   |
| Richard     | T.       | Oakley      |
| Makoto      |          | Oba         |
| Hiroataka   |          | Obana       |
| Terrence    |          | O'Brien     |
| Mark        | N.       | Obrovac     |
| Yukie       |          | O'Bryan     |
| Dmitrii     | L'vovich | Obydenov    |
| Ismail      |          | Ocsoy       |
| George      | A.       | O'Doherty   |

|            |       |               |
|------------|-------|---------------|
| Colm       |       | O'Dwyer       |
| Artem      | R.    | Oganov        |
| Jung Kwon  |       | Oh            |
| Joon Hak   |       | Oh            |
| Dermot     |       | O'Hare        |
| Kei        |       | Ohkubo        |
| Takeshi    |       | Ohkuma        |
| Toshimichi |       | Ohmura        |
| Takashi    |       | Ohshima       |
| Atsushi    |       | Ohtaka        |
| Makoto     |       | Ojika         |
| Tomohiko   |       | Okada         |
| Hideki     |       | Okamoto       |
| Masami     |       | Okamoto       |
| Sergei A.  |       | Okorochenkov  |
| Yoshinori  |       | Okuno         |
| Susan      | V.    | Olesik        |
| Joaquim    | M.    | Oliveira      |
| Lafon      |       | Olivier       |
| Marilyn    | M.    | Olmstead      |
| Syed Haris |       | Omar          |
| Mar        |       | Ondrechen     |
| James      | P.    | O'Neil        |
| Chien Wei  |       | Ooi           |
| Chris      |       | Oostenbrink   |
| Yousuke    |       | Ooyama        |
| Mario      |       | Ordonez       |
| Akihiro    |       | Orita         |
| Antonio    |       | Orlacchio     |
| Marcelo    | O.    | Orlandi       |
| Pal        |       | Ormos         |
| Mario      |       | Orsi          |
| Enrique    |       | Ortí          |
| Michele    |       | Ortolani      |
| Rosa       | M.    | Ortuño        |
| Madhavi    |       | Oruganti      |
| Hiroyuki   |       | Osada         |
| Itaru      |       | Osaka         |
| Yasuko     |       | Osakada       |
| Helen      | M. I. | Osborn        |
| Martin     |       | Oschatz       |
| Neil       |       | Osheroff      |
| Oksana     |       | Ostroverkhova |
| Atsuhiko   |       | Osuka         |
| Masaki     |       | Ota           |
| Masaki     |       | Otagiri       |
| Antonio    |       | Otero         |
| Jacek      |       | Otlewski      |

|              |             |               |
|--------------|-------------|---------------|
| Takuhiro     |             | Otosu         |
| Luca         |             | Ottaviano     |
| Henrik       |             | Ottosson      |
| Sandor       | B.          | Otvos         |
| Xin          |             | Ou            |
| Junke        |             | Ou            |
| Lahcene      |             | Ouahab        |
| Liang        |             | Ouyang        |
| Liuzhang     |             | Ouyang        |
| M. L.        |             | Ovcharov      |
| Róisín       | M.          | Owens         |
| Kenichi      |             | Oyaizu        |
| Hiroaki      |             | Ozawa         |
| Ece          |             | Ozturk        |
| Ramacharyulu | V. R. K.    | P.            |
| Srihari      |             | Pabbaraja     |
| Gianfranco   |             | Pacchioni     |
| Vittorio     |             | Pace          |
| Pradip       |             | Pachfule      |
| Thomas       | Muthiah     | Packianathan  |
| Padma        | Kumar       | Padmanabhan   |
| Daniel       |             | Padro         |
| Kamil        |             | Paduszyński   |
| Seung-Min    |             | Paek          |
| Julieta I.   | I.          | Paez          |
| Gavin        | F.          | Painter       |
| Ana Paula    |             | Paiva         |
| Marcio       | W.          | Paixao        |
| Thiago       | R. L. Cesar | Paixão        |
| Tapani       | A.          | Pakkanen      |
| Amlan        | J.          | Pal           |
| Kuntal       |             | Pal           |
| Manojit      |             | Pal           |
| Mrinal       |             | Pal           |
| Sagar        |             | Pal           |
| Tarasankar   |             | Pal           |
| Umapada      |             | Pal           |
| Manojit      |             | Pal           |
| Gustavo      |             | Palacios      |
| M.           | Alcolea     | Palafox       |
| Hasan        |             | Palandoken    |
| Teresa       | A.          | Palazzo       |
| M. A.        |             | Palazzolo     |
| Venkat       |             | Palle         |
| Matteo       |             | Palma         |
| Padmaja      | Sudhakar    | Pamidimukkala |
| Canping      |             | Pan           |
| Chunyue      |             | Pan           |

|                        |         |                 |
|------------------------|---------|-----------------|
| Jiaqi                  |         | Pan             |
| Kai                    |         | Pan             |
| Likun                  |         | Pan             |
| Lun                    |         | Pan             |
| Qing-Jiang             |         | Pan             |
| Shilie                 |         | Pan             |
| Ying-Ming              |         | Pan             |
| Hui                    |         | Pan             |
| Tung-Ming              |         | Pan             |
| Xuejun                 |         | Pan             |
| Costas                 |         | Panayiotou      |
| Amiya                  | Kumar   | Panda           |
| Asit                   | B.      | Panda           |
| Om                     | Prakash | Pandey          |
| Siddharth              |         | Pandey          |
| Sadanand               |         | Pandey          |
| Pallavi                |         | Pandit          |
| Xuan                   |         | Pang            |
| Yi                     |         | Pang            |
| Tao                    |         | Pang            |
| Alexander              | M.      | Panich          |
| Konstantin             |         | Panov           |
| Guido                  |         | Panzarasa       |
| Roberto                |         | Paolesse        |
| Annalisa               |         | Paolone         |
| Feroz R.               |         | Papa            |
| George                 | Z.      | Papageorgiou    |
| Wolfgang               | J.      | Parak           |
| Priyakumari Chakkingal | P.      | Parambil        |
| Keykavous              |         | Parang          |
| Patrina                |         | Paraskevopoulou |
| Raveen                 |         | Parboosing      |
| Michal                 |         | Pardo           |
| Leonardo               |         | Pardo           |
| Kulamani               |         | Parida          |
| Jigisha                | K.      | Parikh          |
| Enoch Y.               |         | Park            |
| Cheol-Hwan             |         | Park            |
| Ho Seok                |         | Park            |
| Ho-Yong                |         | Park            |
| Hyun Gyu               |         | Park            |
| Jeong Young            |         | Park            |
| Jong-Seok              |         | Park            |
| Juhyun                 |         | Park            |
| Myoung-Hwan            |         | Park            |
| Myung Hwan             |         | Park            |
| Nam-Gyu                |         | Park            |
| Noejung                |         | Park            |

|                 |         |                    |
|-----------------|---------|--------------------|
| Nokyoung        |         | Park               |
| Soo-Jin         |         | Park               |
| Jihye           |         | Park               |
| Yoon Cheol      |         | Park               |
| Raman           |         | Parkesh            |
| Jon R.          |         | Parquette          |
| Mazeyar         |         | Parvinzadeh Gashti |
| Dario           |         | Pasini             |
| Luigi           |         | Pasqua             |
| Helena          |         | Passos             |
| Igor            | A.      | Pasti              |
| Isabel          |         | Pastor             |
| Mariachiara     |         | Pastore            |
| Bhisma          | K.      | Patel              |
| Rajan           |         | Patel              |
| Rajankumar      | L.      | Patel              |
| Tanmaya         |         | Pathak             |
| Ranjana         |         | Pathania           |
| Falguni         |         | Pati               |
| Nitin           | T.      | Patil              |
| Sayali          |         | Patil              |
| Avinash         | J.      | Patil              |
| Amitava         |         | Patra              |
| Goutam          | Kumar   | Patra              |
| Gilles          |         | Patriarche         |
| Birija          |         | Patro              |
| Mookda          |         | Pattarawarapan     |
| Graham          |         | Pattison           |
| Jean-Francois   |         | Paul               |
| Ioannis         | V.      | Pavlidis           |
| Valeri          |         | Pavlov             |
| Gregory         | F.      | Payne              |
| Manuel          | M       | Paz                |
| Gholamreza      |         | Pazuki             |
| Jason           | Kenneth | Pearson            |
| W.              |         | Pecharapa          |
| Jan             | Skov    | Pedersen           |
| Venkateswara R. |         | Pedireddi          |
| Rafael          |         | Pedrosa            |
| Renjun          |         | Pei                |
| Dehua           |         | Pei                |
| Christian       |         | Pellerin           |
| Giuseppe        |         | Pellicane          |
| Robert          | H.      | Pelton             |
| Andrea          |         | Peluso             |
| Eduardo         |         | Peña-Cabrera       |
| Laura           |         | Pena-Paras         |
| Cristina        |         | Peña-Rodriguez     |

|               |                  |                  |
|---------------|------------------|------------------|
| Cheng         |                  | Peng             |
| Feng          |                  | Peng             |
| Feng          |                  | Peng             |
| Jing          |                  | Peng             |
| Mingying      |                  | Peng             |
| Qiang         |                  | Peng             |
| Xiaojun       |                  | Peng             |
| Yankun        |                  | Peng             |
| Yanqing       |                  | Peng             |
| Yuxing        |                  | Peng             |
| Bradley       | L.               | Pentelute        |
| M. Judith     |                  | Percino          |
| Andrej        |                  | Perdih           |
| Laura         | C. de Jesus      | Pereira          |
| Claudio M. P. |                  | Pereira          |
| Igor          | F.               | Perepichka       |
| Lalith        |                  | Perera           |
| Rocio         |                  | Perez            |
| José          |                  | Pérez Sestelo    |
| J. J.         |                  | Pérez-Bueno      |
| Jesus         |                  | Perez-Gil        |
| Ezequiel      |                  | Perez-Inestrosa  |
| Jorge         |                  | Perez-Juste      |
| Raul          |                  | Perez-Ruiz       |
| Horacio       |                  | Perez-Sanchez    |
| Mariano       |                  | Pérez-Sánchez    |
| Jesús J.      |                  | Pérez-Torrente   |
| Jaime         |                  | Pérez-Villanueva |
| Eduardo       |                  | Peris            |
| Christopher   | C.               | Perry            |
| Paramasivan   | Thirumalai       | Perumal          |
| Dmitry        | V.               | Peryshkov        |
| Hrvoje        |                  | Petek            |
| Laurence      | M.               | Peter            |
| Elijah        | J.               | Petersen         |
| Kimberly      | S.               | Petersen         |
| Blake         | R.               | Peterson         |
| Kirk          | A.               | Peterson         |
| Denise        | Freitas Siqueira | Petri            |
| Marina        |                  | Petrova          |
| João Flávio   | da Silveira      | Petruci          |
| Luisa         |                  | Petti            |
| Jeffrey       | T.               | Petty            |
| Chi           | Minh             | Phan             |
| Manh-Huong    |                  | Phan             |
| Umberto       |                  | Piarulli         |
| Rosaria Anna  |                  | Picca            |
| Simone        |                  | Piccinin         |

|                 |          |                 |
|-----------------|----------|-----------------|
| Pierre          |          | Pichat          |
| Saravanan       |          | Pichiah         |
| Thomas          |          | Pichler         |
| Wendy           |          | Picking         |
| Ana             | Paula    | Piedade         |
| Joshua          | G.       | Pierce          |
| Filippo         |          | Pierini         |
| Maria Jose      |          | Piernas Muñoz   |
| H. J.           |          | Pietzsch        |
| Robert          | David    | Pike            |
| Ben             | S.       | Pilgrim         |
| Anatoliy        | O.       | Pinchuk         |
| Ángel           |          | Piñeiro         |
| Ehud            |          | Pines           |
| José            | M.       | Pingarrón       |
| Teresa          | M. V. D. | Pinho e Melo    |
| Ernani          |          | Pinto           |
| Elísabet        |          | Pires           |
| Benoit          |          | Piro            |
| Uwe             |          | Pischel         |
| Wojciech        |          | Pisula          |
| Sudhagar        |          | Pitchaimuthu    |
| Michael         |          | Pittelkow       |
| Orest           |          | Pizio           |
| Ernesto         |          | Placidi         |
| Carlos          |          | Platas-Iglesias |
| Janez           |          | Plavec          |
| Damian          |          | Plazuk          |
| Jurgen          |          | Pleiss          |
| Cédric          |          | Plesse          |
| Mark            |          | Plummer         |
| Rudolf          |          | Podgornik       |
| Vitaly          |          | Podzorov        |
| Fabrice         |          | Pointillart     |
| Donald          |          | Poirier         |
| Stephanie       |          | Poland          |
| Lakshminarayana |          | Polavarapu      |
| Prasad          | L.       | Polavarapu      |
| Peter           |          | Politzer        |
| Yves            |          | Pommier         |
| Pier            | Paolo    | Pompa           |
| Ramon           |          | Pons            |
| Colin           | Frank    | Poole           |
| David           |          | Portehault      |
| Ricardo W.      |          | Portela         |
| Jeff            |          | Potoff          |
| Antje           |          | Potthast        |
| Erwan           |          | Poupon          |



|                     |             |                  |
|---------------------|-------------|------------------|
| Ian                 | M.          | Power            |
| Oscar               | J.          | Pozo             |
| Kandasamy           |             | Prabakar         |
| Ratna               |             | Prabha           |
| Supaluk             |             | Prachayasittikul |
| Pushpangadan Indira |             | Pradeepkumar     |
| Natarajan           |             | Prakash          |
| Animesh             |             | Pramanik         |
| Alka                |             | Prasher          |
| Maurizio            |             | Prato            |
| Sotiris             | E.          | Pratsinis        |
| Batirtze            |             | Prats-Mateu      |
| Andrey              | N.          | Pravdivtsev      |
| Sarva               |             | Praveena         |
| Wilfrid             |             | Prellier         |
| Pavle               | I.          | Premovic         |
| Kathryn             | E.          | Preuss           |
| Carlos              | M.          | Previtali        |
| Martine             |             | Prévost          |
| Eric                |             | Price            |
| Craig               |             | Priest           |
| Menno               | W. J.       | Prins            |
| U. Deva             |             | Priyakumar       |
| Marek               |             | Prochazka        |
| Hongting            |             | Pu               |
| Kanyi               |             | Pu               |
| Andrea              |             | Pucci            |
| Jordi               |             | Puiggali         |
| Sandra              | Helena      | Pulcinelli       |
| Martin              |             | Pumera           |
| Benudhar            |             | Punji            |
| Pradipta            |             | Purkayastha      |
| Roberto             |             | Purrello         |
| Cory                | Christopher | Pye              |
| Stephen             | G.          | Pyne             |
| Pekka               |             | Pyykko           |
| Abou el kacem       |             | Qaiss            |
| Jun Lei             |             | Qi               |
| Li                  |             | Qi               |
| Xiang               |             | Qi               |
| Xian-rong           |             | Qi               |
| Hai                 |             | Qian             |
| Xiang               |             | Qian             |
| Xing                |             | Qian             |
| Yan                 |             | Qian             |
| Zhiyong             |             | Qian             |
| Greg                | G.          | Qiao             |
| Juan                |             | Qiao             |

|               |       |                 |
|---------------|-------|-----------------|
| Changhe       |       | Qiao            |
| Rui           |       | Qiao            |
| Anjun         |       | Qin             |
| Yuancheng     |       | Qin             |
| Zongyi        |       | Qin             |
| Dong          |       | Qiu             |
| Jianrong      |       | Qiu             |
| Jin           |       | Qu              |
| Jinping       |       | Qu              |
| Songnan       |       | Qu              |
| Bo            |       | Qu              |
| Zheng-Jun     |       | Quan            |
| Eugenio       |       | Quaranta        |
| Yves          |       | Queneau         |
| Frank         | H.    | Quina           |
| Jordi         |       | Quintana        |
| Liliana       |       | Quintanar       |
| Marta         |       | Quintanilla     |
| Joselito      |       | Quirino         |
| Mumtaz        | Ahmad | Quraishi        |
| Ahsanulhaq    |       | Qurashi         |
| Mohammad      |       | Qureshi         |
| Alvaro        |       | R. Muñoz-Castro |
| Paul          | R.    | Rablen          |
| Muhammad      |       | Rabnawaz        |
| Freddy        | T.    | Rabouw          |
| Joanna        |       | Raczkowska      |
| Sergei        |       | Radaev          |
| E. K.         |       | Radhakrishnan   |
| K. V.         |       | Radhakrishnan   |
| Roumen        |       | Radinov         |
| Leo           |       | Radom           |
| Ezzat         |       | Rafiee          |
| Arthur        | J.    | Ragauskas       |
| Krishnan      |       | Raghavachari    |
| Michael       | J.    | Ragusa          |
| Robert        |       | Raguso          |
| Saar          |       | Rahav           |
| Mohammed      | M.    | Rahman          |
| Shyam Bahadur |       | Rai             |
| Vineet        | Kumar | Rai             |
| Priyamvada    |       | Rai             |
| Rana          |       | Rais            |
| Kalavathy     |       | Rajan           |
| Moab          |       | Rajan Philip    |
| Gopalan       |       | Rajaraman       |
| Govindaraju   |       | Rajkumar        |
| Jaspreet Kaur |       | Rajput          |

|                     |            |                    |
|---------------------|------------|--------------------|
| Raghunath           | Ozhapakkam | Ramabhadran        |
| Dhevalapally        | Buchi      | Ramachary          |
| Balamurugan         |            | Ramalingam         |
| S.                  |            | Ramalingam         |
| Ayyalusamy          |            | Ramamoorthy        |
| Vaidhyanathan       |            | Ramamurthy         |
| Chepuri             | V.         | Ramana             |
| Arunas              |            | Ramanavicius       |
| Ali                 |            | Ramazani           |
| M. T.               |            | Ramesan            |
| Aiyagari            |            | Ramesh             |
| Kanaparthi          |            | Ramesh             |
| Perumal             |            | Rameshkumar        |
| Mariola             | O.         | Ramirez            |
| Magdalena           |            | Ramirez-Corredores |
| Carlos              | H. I.      | Ramos              |
| Clécio              | Souza      | Ramos              |
| Pedro               |            | Ramos-Cabrer       |
| Victor              | Hugo       | Ramos-Sanchez      |
| Chongzhao           |            | Ran                |
| Dipak               |            | Rana               |
| Rohit               | Kumar      | Rana               |
| Surjyakanta         |            | Rana               |
| Alok                |            | Ranjan             |
| Hanbing             |            | Rao                |
| Chebrolu            | Pulla      | Rao                |
| H. Surya Prakash    |            | Rao                |
| K. S. V. Krishna    |            | Rao                |
| Apparao             | M.         | Rao                |
| Lang                |            | Rao                |
| Pratap              | Mahesh     | Rao                |
| Vijay               |            | Rao                |
| Guido               |            | Raos               |
| P. Abdul            |            | Rasheed            |
| Colin               | L.         | Raston             |
| Virendra            | Kisan      | Rathod             |
| Prasad              |            | Raut               |
| Amelia              | Pilar      | Rauter             |
| P.                  |            | Ravichandiran      |
| V.                  |            | Ravichandran       |
| Diwan               | S.         | Rawat              |
| Atul                |            | Rawat              |
| Kallol              |            | Ray                |
| Suprakas            | Sinha      | Ray                |
| Anwar               |            | Rayan              |
| John Bosco Balaguru |            | Rayappan           |
| Arup                | Kumar      | Raychaudhuri       |
| Françisco           | M.         | Raymo              |

|                 |       |                |
|-----------------|-------|----------------|
| Kevin           | D.    | Read           |
| Javier          |       | Read de Alaniz |
| D. Srinivasa    |       | Reddy          |
| Gan             | G.    | Redhi          |
| Stephen         |       | Rees           |
| Manfred         | T.    | Reetz          |
| Javier          |       | Reguera        |
| Niels-Christian |       | Reichardt      |
| Neil            | James | Reilly         |
| Luis            |       | Reina          |
| Helmut          |       | Reinecke       |
| Bjoern          | M.    | Reinhard       |
| Oliver          |       | Reiser         |
| Chandrababu     |       | Rejeeth        |
| Hynd            |       | Remita         |
| Feng            |       | Ren            |
| Fuzeng          |       | Ren            |
| Wencai          |       | Ren            |
| Ying            |       | Ren            |
| Jianhua         |       | Ren            |
| Pierre-Yves     |       | Renard         |
| Olivier         |       | Renaudet       |
| Tom             |       | Renders        |
| Michel          |       | Rérat          |
| Daniel          | E.    | Resasco        |
| Marina          |       | Resmini        |
| Markus          |       | Retsch         |
| Abigail         |       | Reyes          |
| Jean-Louis      |       | Reymond        |
| Marcos Caroli   |       | Rezende        |
| Mauro           | C. C. | Ribeiro        |
| Sidney          |       | Ribeiro        |
| John            | P.    | Richard        |
| Nigel           | G. J. | Richards       |
| Gunther         |       | Richter        |
| George          | B.    | Richter-Addo   |
| Serena          |       | Riela          |
| Lia             |       | Rimondini      |
| John            | A.    | Ripmeester     |
| Chad            |       | Risko          |
| Bailey          |       | Risteen        |
| Vincent         |       | Ritleng        |
| Francisco       |       | Rivadulla      |
| Roberto         |       | Rivelino       |
| Loris           |       | Rizzello       |
| John            | P.    | Robinson       |
| Hans            | D.    | Robinson       |
| Chandrashekhar  | V.    | Rode           |

|             |         |                          |
|-------------|---------|--------------------------|
| Alirio      | Egidio  | Rodrigues                |
| Jose        | A.      | Rodriguez                |
| Antonio     |         | Rodriguez-Dieguez        |
| Benito      |         | Rodríguez-González       |
| Laura       |         | Rodriguez-Lorenzo        |
| Braulio     |         | Rodríguez-Molina         |
| Flor        |         | Rodriguez-Prieto         |
| Roland      |         | Roesler                  |
| Andrey      | L.      | Rogach                   |
| Michael     | A.      | Rogers                   |
| Dominga     |         | Rogolino                 |
| Jaroslav    |         | Roh                      |
| Harald      |         | Rohm                     |
| Anna        |         | Roig                     |
| Adrian      | E.      | Roitberg                 |
| Jana        |         | Roithová                 |
| Romeo       |         | Romagnoli                |
| Gheorghe    |         | Roman                    |
| Santiago    |         | Romero-Vargas Castrillón |
| Liangce     |         | Rong                     |
| Zeming      |         | Rong                     |
| Ben-Guang   |         | Rong                     |
| Guoxin      |         | Rong                     |
| Robert      |         | Ros                      |
| Livia       |         | Rosa Fernandes           |
| Antonio     |         | Rosales Martínez         |
| Devin       | Jerrold | Rose                     |
| Carlo       |         | Roselli                  |
| Edward      |         | Rosenberg                |
| Lasse       | Aistrup | Rosendahl                |
| Sergiy      | V.      | Rosokha                  |
| Benjamin    | P.      | Ross                     |
| Liane       | Marcia  | Rossi                    |
| Abdul Wahab |         | Roswanira                |
| Irena       |         | Roterman                 |
| Stephan     | V.      | Roth                     |
| Olivier     |         | Roubeau                  |
| Roger       |         | Rousseau                 |
| Stéphane    |         | Roux                     |
| Paolo       |         | Rovero                   |
| Magdalena   |         | Rowinska-Zyrek           |
| Kunal       |         | Roy                      |
| Sounak      |         | Roy                      |
| Elena       | A.      | Rozhkova                 |
| Eriks       |         | Rozners                  |
| Qiang       |         | Ru                       |
| J. Miguel   |         | Rubi                     |
| Boris       |         | Rubinsky                 |

|             |        |                |
|-------------|--------|----------------|
| Cecilia     |        | Rubio          |
| Soledad     |        | Rubio          |
| Michael     |        | Ruby Raj       |
| Anna        |        | Rudawska       |
| Rainer      |        | Rudert         |
| Magnus      |        | Rueping        |
| Yu-kui      |        | Rui            |
| Eelco       |        | Ruijter        |
| Eliseo      |        | Ruiz           |
| Nerea       |        | Ruiz           |
| Maria Pilar |        | Ruiz Ramiro    |
| Jesús       |        | Ruiz-Cabello   |
| Yosadara    |        | Ruiz-Morales   |
| Thanyada    |        | Rungrotmongkol |
| Brandon     | T.     | Ruotolo        |
| Peter       |        | Ruschhaupt     |
| Edina       |        | Rusen          |
| Nino        |        | Russo          |
| Febdian     |        | Rusydi         |
| Ilhyong     |        | Ryu            |
| Du Yeol     |        | Ryu            |
| Jeong Ho    |        | Ryu            |
| Jung Su     |        | Ryu            |
| Wu          |        | S              |
| Laura       |        | Saa            |
| Ann         |        | Saada          |
| Kay         |        | Saalwaechter   |
| George      |        | Sack           |
| Morteza     |        | Sadeghi        |
| Rahmat      |        | Sadeghi        |
| Hamidreza   |        | Sadeghifar     |
| Samrand     |        | Saeidi         |
| Daisuke     |        | Saeki          |
| Bidyut      |        | Saha           |
| Subit       | Kumar  | Saha           |
| Nabanita    |        | Saha           |
| Basudeb     |        | Saha           |
| Nurettin    |        | Sahiner        |
| P.S. Sai    |        | Sai Prasad     |
| Radomir     | Nikola | Saicic         |
| Kayarat     |        | Saikrishnan    |
| Frank       |        | Sainsbury      |
| Hiroki      |        | Sakaguchi      |
| Masakiyo    |        | Sakaguchi      |
| Akira       |        | Sakai          |
| Takash      |        | Sakamoto       |
| Katsumi     |        | Sakata         |
| Rajeev      |        | Sakhuja        |

|                        |         |                  |
|------------------------|---------|------------------|
| Hidehiro               |         | Sakurai          |
| Kazuo                  |         | Sakurai          |
| Shinichi               |         | Sakurai          |
| Dennis                 | R.      | Salahub          |
| Luca                   |         | Salassa          |
| Masoud                 |         | Salavati-Niasari |
| Tawfik                 | Abdo    | Saleh            |
| Navid                  | B.      | Saleh            |
| Peyman                 |         | Salehi           |
| Sahar                  |         | Salehi           |
| Antonio                |         | Salgado Somoza   |
| Rachid                 |         | Salghi           |
| Veronica               |         | Salgueiriño      |
| Júlia                  |         | Salla            |
| Juha-Pekka             |         | Salminen         |
| Anniina                |         | Salonen          |
| Paulo                  |         | Salústio         |
| Ricardo de Vasconcelos |         | Salvo            |
| Ernesto                |         | Salzano          |
| Rajarshi               |         | Samanta          |
| Anna Cristina          |         | Samia            |
| Paolo                  |         | Samorì           |
| Srinivasan             |         | Sampath          |
| Srinivasa-Gopalan      |         | Sampathkumar     |
| Uri                    |         | Samuni           |
| Luis                   |         | Sanchez          |
| Ana                    |         | Sánchez-Iglesias |
| Ana                    |         | Sanchez-Migallon |
| Adela                  | María   | Sánchez-Moreiras |
| Adam                   |         | Sander           |
| Ana                    |         | San-Felix        |
| Kanokphorn             |         | Sangkharak       |
| Gangadhar              | Jessy   | Sanjayan         |
| Miguel                 | Angel   | San-Miguel       |
| Seigo                  |         | Sanoh            |
| María Ángeles          |         | Sanromán         |
| Gaurav                 | N.      | Sant             |
| Sonsoles               | Martin  | Santamaria       |
| Karina T. O.           |         | Santana-Jorge    |
| Claudio                |         | Santi            |
| Fabrizio               |         | Santoro          |
| Hélder                 | A.      | Santos           |
| José                   | Ignacio | Santos           |
| Suparna                |         | Sanyal           |
| Amitav                 |         | Sanyal           |
| Pablo                  | J.      | Sanz Miguel      |
| Liel                   |         | Sapir            |
| Haritz                 |         | Sardón           |

|             |             |                |
|-------------|-------------|----------------|
| Biprajit    |             | Sarkar         |
| Nilmoni     |             | Sarkar         |
| Utpal       |             | Sarkar         |
| Sabyasachi  |             | Sarkar         |
| Pranab      |             | Sarker         |
| Stephen     | A.          | Sarles         |
| Maria       |             | Sarmento       |
| Ariel       | M.          | Sarotti        |
| Giulio      | C.          | Sarti          |
| Takehiko    |             | Sasaki         |
| Takahiro    |             | Sasamori       |
| Guilherme   | Lanzi       | Sassaki        |
| Angela      |             | Sastre-Santos  |
| Narahari    |             | Sastry         |
| Takaaki     |             | Sato           |
| Kotaro      |             | Satoh          |
| P.          | Gursumeeran | Satsangi       |
| S.          |             | Satyanarayana  |
| Phillip     | E.          | Savage         |
| Philipp     |             | Savakis        |
| Vladimir    |             | Savic          |
| Daniel      | A.          | Savin          |
| Juan        | C.          | Scaiano        |
| Andrea      |             | Scaloni        |
| Eoin        | M.          | Scanlan        |
| David       | O.          | Scanlon        |
| Leonardo    |             | Scarabelli     |
| Alessandro  |             | Scarso         |
| Frank       |             | Schaper        |
| Bohdan      |             | Schatschneider |
| Juergen     |             | Schatz         |
| Frank       |             | Scheffold      |
| Steve       |             | Scheiner       |
| Gerhard     |             | Schenk         |
| Ullrich     |             | Scherf         |
| Peter       |             | Schieberle     |
| Michael     |             | Schindler      |
| David       | A.          | Schiraldi      |
| Guy         |             | Schlatter      |
| H. Bernhard |             | Schlegel       |
| Sandra      |             | Schlögl        |
| Ralf        |             | Schmid         |
| Hubert      |             | Schmidbaur     |
| Bernd       |             | Schmidt        |
| Boris       |             | Schmidt        |
| Peer        |             | Schmidt        |
| Michael     |             | Schmidt        |
| Michael     | W.          | Schmidt        |



|             |               |                    |
|-------------|---------------|--------------------|
| Andreea     | R.            | Schmitzer          |
| Patrik      |               | Schmuki            |
| Raphaël     |               | Schneider          |
| Christoph   |               | Schneider          |
| Joerg       | J.            | Schneider          |
| William     | F.            | Schneider          |
| Andreas     |               | Schnepf            |
| George      |               | Schoendorff        |
| Gregory     | D.            | Scholes            |
| Arne        |               | Schön              |
| Andreas     |               | Schönhals          |
| Georg       |               | Schreckenbach      |
| Sven        |               | Schumann           |
| Philippe    |               | Schwaller          |
| Johannes    | W.            | Schwank            |
| Steven      | D.            | Schwartz           |
| Reinhard    |               | Schweitzer-Stenner |
| Petra       |               | Schwille           |
| Wanderlā    | Luis          | Scopel             |
| Kieran F.   |               | Scott              |
| Robert      | William James | Scott              |
| Jack        | D.            | Scott              |
| Andrea      |               | Scotti             |
| Jonathan    | J. S.         | Scragg             |
| Eric        |               | Scriven            |
| Thomas      |               | Searles            |
| Mailadil    | Thomas        | Sebastian          |
| Daniel      |               | Sebastiani         |
| Ethan       | B.            | Secor              |
| Ronald      |               | See                |
| Edmund      | G.            | Seebauer           |
| Ralf        |               | Seemann            |
| T.          |               | Seenivasagan       |
| Tosawat     |               | Seetawan           |
| Gotthard    |               | Seifert            |
| Andreas     |               | Seifert            |
| Michael     |               | Seitz              |
| Oliver      |               | Seitz              |
| Nagaiyan    |               | Sekar              |
| Tomohiro    |               | Seki               |
| Takahiro    |               | Seki               |
| Christine   |               | Selhuber-Unkel     |
| Annabella   |               | Selloni            |
| Pratik      |               | Sen                |
| Sobhan      |               | Sen                |
| Fatih       |               | Sen                |
| Dulal       |               | Senapati           |
| Maria Luisa | S.            | Senent             |

|                      |        |              |
|----------------------|--------|--------------|
| Durba                |        | Sengupta     |
| Neelanjana           |        | Sengupta     |
| John                 | M.     | Senko        |
| Michael              | W.     | Senko        |
| Sirugaloor Thangavel |        | Senthilkumar |
| Hyo Jin              |        | Seo          |
| Jeong Hyun           |        | Seo          |
| Ji-Hun               |        | Seo          |
| Min-Kyo              |        | Seo          |
| Jukka                | V.     | Seppälä      |
| Borja                |        | Sepulveda    |
| Javier               |        | Seravalli    |
| Alena                |        | Sergeeva     |
| Takeshi              |        | Serizawa     |
| Cem                  |        | Sevik        |
| Mustafa              | Kemal  | Sezgintürk   |
| Fabio                |        | Sgolastra    |
| Jacopo               |        | Sgrignani    |
| Yehuda               |        | Shabtai      |
| Kavita               |        | Shah         |
| Faraz                |        | Shaikh       |
| Ahmed                | Esmail | Shalan       |
| Menny                |        | Shalom       |
| Songmin              |        | Shang        |
| Dihua                |        | Shangguan    |
| Prabakaran           |        | Shankar      |
| Ganesh               |        | Shanmugam    |
| Maheswaran           |        | Shanmugam    |
| Sangaraju            |        | Shanmugam    |
| Jiang-Yang           |        | Shao         |
| Jinyou               |        | Shao         |
| Lidong               |        | Shao         |
| Li-Xiong             |        | Shao         |
| Lu                   |        | Shao         |
| Mingfei              |        | Shao         |
| Fangwei              |        | Shao         |
| Joseph               | G.     | Shapter      |
| Tarun                | Kumar  | Sharma       |
| Diganta              |        | Sharma       |
| Rakesh               | K.     | Sharma       |
| Sahil                |        | Sharma       |
| Upendra              |        | Sharma       |
| Vishnu               | Lal    | Sharma       |
| Nilesh               |        | Sharma       |
| Philip               | C.     | Sharpe       |
| Kevin                | H.     | Shaughnessy  |
| Dmitry               | G.     | Shchukin     |
| Keith                | E.     | Shearwin     |

|                |       |            |
|----------------|-------|------------|
| Sergei         | S.    | Sheiko     |
| M. Scott       |       | Shell      |
| Wei            |       | Shen       |
| Xiaoping       |       | Shen       |
| Yafei          |       | Shen       |
| Yue            |       | Shen       |
| Yun-Heng       |       | Shen       |
| Zhenlu         |       | Shen       |
| Qinglin        |       | Sheng      |
| Bao            |       | Shenxu     |
| Tom            | David | Sheppard   |
| Anna           |       | Shevchenko |
| Michael        |       | Shevlin    |
| Caijun         |       | Shi        |
| Jianlin        |       | Shi        |
| Jie-hua        |       | Shi        |
| Jingli         |       | Shi        |
| Jinsheng       |       | Shi        |
| Qiang          |       | Shi        |
| Shuo           |       | Shi        |
| Weidong        |       | Shi        |
| Wei-Qun        |       | Shi        |
| Xiao-Xin       |       | Shi        |
| Yifeng         |       | Shi        |
| Yongqian       |       | Shi        |
| Zhan           |       | Shi        |
| Wenying        |       | Shi        |
| Honglan        |       | Shi        |
| Suan           |       | Shi        |
| Wei            |       | Shi        |
| Fumiyuki       |       | Shiba      |
| Fumitoshi      |       | Shibahara  |
| Muhammad J. A. |       | Shiddiky   |
| Julia          | M.    | Shifman    |
| Olga           |       | Shilova    |
| Shigeru        |       | Shimada    |
| Kengo          |       | Shimanoe   |
| George         | K. H. | Shimizu    |
| Ken-Ichi       |       | Shimizu    |
| Soji           |       | Shimizu    |
| Karina         |       | Shimizu    |
| Ken            | D.    | Shimizu    |
| Atsushi        |       | Shimoyama  |
| Karina         |       | Shimuzu    |
| Injae          |       | Shin       |
| Jae Ho         |       | Shin       |
| Seokmin        |       | Shin       |
| Tsutomu        |       | Shiragami  |

|             |         |                  |
|-------------|---------|------------------|
| Yasuhiro    |         | Shiraishi        |
| Sagar       | Eknath  | Shirsath         |
| Brian       | K.      | Shoichet         |
| Parvin      |         | Shokrollahi      |
| Matthew     | P.      | Shores           |
| Kamlesh     | Kumar   | Shrivastava      |
| Indira      | H.      | Shrivastava      |
| Leah        | P.      | Shriver          |
| Jie         |         | Shu              |
| Chi-Min     |         | Shu              |
| Zhao        |         | Shuai            |
| Shaomin     |         | Shuang           |
| Atsuomi     |         | Shundo           |
| Ian         | Gregory | Shuttleworth     |
| Chen        |         | Si               |
| Zhichun     |         | Si               |
| Zili        |         | Sideratou        |
| Matthäus    |         | Siebenhofer      |
| Scott       |         | Sieburth         |
| Donald      | J.      | Siegel           |
| Ulrich      |         | Siemeling        |
| J.          | Ilja    | Siepmann         |
| Tomasz      |         | Sierański        |
| Mark        | V.      | Sigalov          |
| Li          |         | Si-Jia           |
| Ewa         |         | Sikorska         |
| Juana       | J.      | Silber           |
| Giuliano    |         | Siligardi        |
| Artur M. S. |         | Silva            |
| Joaquin     |         | Silvestre-Albero |
| Jesus       |         | Simal-Gandara    |
| Tomekia     |         | Simeon           |
| Nikola      |         | Simidjievski     |
| Luis        |         | Simón            |
| Gerard      |         | Simonneaux       |
| Andre       | J       | Simpson          |
| Alexandre   |         | Simula           |
| Petr        |         | Simunek          |
| Girija      | S.      | Singh            |
| Kulbir      |         | Singh            |
| Varoon      |         | Singh            |
| Ajai        | Kumar   | Singh            |
| Baljit      |         | Singh            |
| Inder Pal   |         | Singh            |
| Jayant      | Kumar   | Singh            |
| Man         |         | Singh            |
| Neetu       |         | Singh            |
| Prabhat     | K.      | Singh            |

|              |               |                  |
|--------------|---------------|------------------|
| Ram          | Niwas         | Singh            |
| Sanjay       | Kumar         | Singh            |
| Shailza      |               | Singh            |
| Surinder     | P.            | Singh            |
| Satendra Pal |               | Singh            |
| Sooboo       |               | Singh            |
| Gurpreet     |               | Singh            |
| Prabhpreet   |               | Singh            |
| Nayan        | Ranjan        | Singha           |
| Surajit      |               | Sinha            |
| Alexander    |               | Sinitskii        |
| Teow         |               | Sin-Yeang        |
| Tuomo        |               | Siponkoski       |
| Ravi         |               | Sirdeshmukh      |
| Sanyasi      |               | Sitha            |
| Michael      |               | Siu              |
| Sri          |               | Sivakumar        |
| Easan        |               | Sivaniah         |
| Arumugam     |               | Sivasamy         |
| K.           |               | Skalicka-Wozniak |
| Phil         |               | Skolnick         |
| Sara         | E.            | Skrabalak        |
| Mikael       | O.            | Skrifvars        |
| Elzbieta     |               | Skrzynska        |
| Ludovit      |               | Skultety         |
| Ewa          |               | Skwarek          |
| Jason        | D.            | Slinker          |
| Michel       |               | Sliwa            |
| Igor I.      |               | Slowing          |
| Jan-Henrik   |               | Smått            |
| Panagiotis   | G.            | Smirniotis       |
| Terry        | K.            | Smith            |
| Lloyd        | M.            | Smith            |
| York R.      |               | Smith            |
| Giulietta    |               | Smulevich        |
| Barry        | B.            | Snider           |
| Nathaniel    | W.            | Snyder           |
| Mike         |               | Snyder           |
| Thereza      | A.            | Soares           |
| Cláudio      | M.            | Soares           |
| Marcin       |               | Sobczak          |
| Jan          |               | Sobus            |
| Koji         |               | Sode             |
| Matthew      | B.            | Soellner         |
| Didem        |               | Sohretoglu       |
| Eduardo      |               | Sola             |
| R.           | John          | Solaro           |
| Mahmoud      | Gamal Mohamed | Soliman          |

|               |         |                  |
|---------------|---------|------------------|
| Mohammad      |         | Solimannejad     |
| Niclas        |         | Solin            |
| Matthieu      |         | Sollogoub        |
| Gemma         | C.      | Solomon          |
| J. Félix      | Armando | Soltero Martínez |
| Pentti        |         | Somerharju       |
| Jun           |         | Song             |
| Bo            |         | Song             |
| Pingan        |         | Song             |
| Qin-Hua       |         | Song             |
| Shiping       |         | Song             |
| Shuyan        |         | Song             |
| Weiguo        |         | Song             |
| Yan           |         | Song             |
| Yanlin        |         | Song             |
| Yonghai       |         | Song             |
| Changsik      |         | Song             |
| Lijiang       |         | Song             |
| Jie           |         | Song             |
| R. K.         |         | Soni             |
| Sumit         | Kumar   | Sonkar           |
| Laxmi Gayatri |         | Sorokhaibam      |
| Jean-Baptiste |         | Sortais          |
| Salvatore     |         | Sortino          |
| Alejandro     |         | Sosnik           |
| Andres        |         | Sotelo           |
| Rogelio       |         | Sotelo-Boyas     |
| Sophia        |         | Sotiropoulou     |
| Paul          |         | Sotta            |
| Tero          |         | Soukka           |
| Christopher   |         | Southan          |
| Cengiz        |         | Soykan           |
| Piero         |         | Sozzani          |
| Mark          | A.      | Spackman         |
| Dino          |         | Spagnoli         |
| Stefan        |         | Spange           |
| Frank         | C.      | Spano            |
| Adolfo        |         | Speghini         |
| Iuliana       |         | Spiridon         |
| Jiri          |         | Sponer           |
| Michael       |         | Springborg       |
| Juan          | A.      | Squella          |
| Sainath       |         | Sri Bhashyam     |
| Mugdha        |         | Srivastava       |
| Aasheesh      |         | Srivastava       |
| Anurag        |         | Srivastava       |
| Suneel        | Kumar   | Srivastava       |
| Seergazhi     | G.      | Srivatsan        |

|              |           |               |
|--------------|-----------|---------------|
| Aladdin M.   |           | Srouer        |
| Andrew       | Valentine | Stachulski    |
| Florian      | J.        | Stadler       |
| Marc         |           | Stadler       |
| Luc          |           | Stafford      |
| Stefano      |           | Stagni        |
| Shannon      | S.        | Stahl         |
| David M.     |           | Stanbury      |
| Jérôme       | Benoit    | Starck        |
| Wendelin     | J.        | Stark         |
| Victor       | M.        | Starov        |
| Roland       |           | Stauber       |
| Tomasz       | M.        | Stawski       |
| Terry        | W. J.     | Steele        |
| Ronald       | Paul      | Steer         |
| Clarice      |           | Steffens      |
| Georg        |           | Steinhauser   |
| Heinrich     |           | Sticht        |
| Klaus Werner |           | Stöckelhuber  |
| Martin       | J.        | Stoermer      |
| Bradley      | Michael   | Stone         |
| Thomas       |           | Strassner     |
| Pavel        | A.        | Strizhak      |
| Dusan        |           | Strmcnik      |
| Alexandra    | E.        | Strom         |
| Robert       | M.        | Strongin      |
| Vitali       | I.        | Stsiapura     |
| Cosima       |           | Stubenrauch   |
| Alexei       | A.        | Stuchebrukhov |
| Mengling     |           | Stuckman      |
| Armido       |           | Studer        |
| Milos        |           | Stupar        |
| Chao         |           | Su            |
| Fabing       |           | Su            |
| Jiaye        |           | Su            |
| Lei          |           | Su            |
| Yaling       |           | Su            |
| Yan          |           | Su            |
| Yuanhai      |           | Su            |
| Zhongmin     |           | Su            |
| Haibin       |           | Su            |
| Hai-Ching    |           | Su            |
| Andres       |           | Suarez        |
| Dimas        |           | Suarez        |
| Fazle        |           | Subhan        |
| Venkatesan   |           | Subramanian   |
| Chandran     |           | Sudakar       |
| H. J.        |           | Sue           |

|            |    |            |
|------------|----|------------|
| Kiyotake   |    | Suenaga    |
| Takeshi    |    | Sugahara   |
| Satoshi    |    | Suganuma   |
| Yoshihiro  |    | Sugi       |
| Jin-Yoo    |    | Suh        |
| Ruohong    |    | Sui        |
| Guodong    |    | Sui        |
| Xiaofeng   |    | Sui        |
| Zhu-Yin    |    | Sui        |
| Tan        |    | Sui        |
| Steven     | L. | Suib       |
| Gleb       |    | Sukhorukov |
| Dipankar   |    | Sukul      |
| Amadeu     | K. | Sum        |
| Kenji      |    | Sumida     |
| Hongqi     |    | Sun        |
| Yubiao     |    | Sun        |
| Z. W.      |    | Sun        |
| Xiangcheng |    | Sun        |
| Chenglin   |    | Sun        |
| Di         |    | Sun        |
| Haitao     |    | Sun        |
| Hong-Bo    |    | Sun        |
| Jian       |    | Sun        |
| Jian       |    | Sun        |
| Jingyu     |    | Sun        |
| Junqi      |    | Sun        |
| Litao      |    | Sun        |
| Lushi      |    | Sun        |
| Mengtao    |    | Sun        |
| Rong       |    | Sun        |
| Run-Cang   |    | Sun        |
| Shi-Peng   |    | Sun        |
| Shulin     |    | Sun        |
| Tiemin     |    | Sun        |
| Wei        |    | Sun        |
| Xiaojuan   |    | Sun        |
| Xiaoqi     |    | Sun        |
| Xuping     |    | Sun        |
| Yinyong    |    | Sun        |
| Yongfu     |    | Sun        |
| Yuping     |    | Sun        |
| Zaicheng   |    | Sun        |
| Zhengzong  |    | Sun        |
| Zenhua     |    | Sun        |
| Zihua      |    | Sun        |
| Zaicheng   |    | Sun        |
| Zhipei     |    | Sun        |



|                   |              |                   |
|-------------------|--------------|-------------------|
| Changquan         | Calvin       | Sun               |
| Dianqing          |              | Sun               |
| Gang              |              | Sun               |
| Hao               |              | Sun               |
| Haoran            |              | Sun               |
| Luyi              |              | Sun               |
| Qi                |              | Sun               |
| Xindi             |              | Sun               |
| Vishnu Baba       |              | Sundaresan        |
| Raghavan          | B.           | Sunoj             |
| Eringathodi       |              | Suresh            |
| Alice             | H.           | Suroviec          |
| Praveen           | Kumar        | Suryadevara       |
| V.                |              | Suryanarayanan    |
| Shinya            |              | Suzuki            |
| Takanori          |              | Suzuki            |
| Seiya             |              | Suzuki            |
| Valery            | Anatolyevich | Svetlichnyi       |
| Nathan            | S.           | Swami             |
| Meenakshisundaram |              | Swaminathan       |
| Jaichander        |              | Swaminathan       |
| Marcel            |              | Swart             |
| Jonathan          | V.           | Sweedler          |
| Katarzyna         |              | Świderek          |
| Jean-Marie        |              | Swiecicki         |
| Andrew            | L.           | Swindle           |
| Matthew           | James        | Sykes             |
| Mark              | D.           | Symes             |
| Konrad            | T.           | Szacilowski       |
| Veronika          | A.           | Szalai            |
| Lech              |              | Sznitko           |
| Michal            |              | Szostak           |
| Katarzyna         |              | Szot-Karpińska    |
| Sabine            |              | Szunerits         |
| Piotr             |              | Szweda            |
| Monika            |              | Szymańska-Chargot |
| Marcel            |              | Tabak             |
| Pablo             |              | Taboada           |
| Carmen            | C.           | Tadini            |
| Syuhada Mohd      |              | Tahir             |
| Kapil             |              | Tahlan            |
| Guoan             |              | Tai               |
| Xishi             |              | Tai               |
| Julien            |              | Tailhades         |
| Noriaki           |              | Takagi            |
| Shinsuke          |              | Takagi            |
| Keisuke           |              | Takahashi         |
| Ryota             |              | Takahashi         |

|                  |      |                |
|------------------|------|----------------|
| Kazuhiko         |      | Takai          |
| Norito           |      | Takamura       |
| Eriko            |      | Takano         |
| Hiromitsu        |      | Takayama       |
| Toshiyuki        |      | Takayanagi     |
| Ken              |      | Takazawa       |
| Yuki             |      | Takechi-Haraya |
| Naoya            |      | Takeda         |
| Shigeori         |      | Takenaka       |
| Satoshi          |      | Takeya         |
| Vicente          |      | Talanquer      |
| Prue             |      | Talbot         |
| Claudio          |      | Taloro         |
| Pinaki           |      | Talukdar       |
| Kam (Michael)    | Chiu | Tam            |
| Yasushi          |      | Tamada         |
| Chandan          |      | Tamuly         |
| Bin              |      | Tan            |
| Hua              |      | Tan            |
| LingHua          |      | Tan            |
| Ming             |      | Tan            |
| Cheemeng         |      | Tan            |
| Auro             | A.   | Tanaka         |
| Fujie            |      | Tanaka         |
| Hiroshi          |      | Tanaka         |
| Keiji            |      | Tanaka         |
| Ken              |      | Tanaka         |
| Masakazu         |      | Tanaka         |
| Tomonari         |      | Tanaka         |
| Masayoshi        |      | Tanaka         |
| Matthew          |      | Tancos         |
| Xiaowu (Shirley) |      | Tang           |
| Ben Zhong        |      | Tang           |
| Bo               |      | Tang           |
| Dianping         |      | Tang           |
| Dianyong         |      | Tang           |
| Guodong          |      | Tang           |
| Guping           |      | Tang           |
| Jian-Xin         |      | Tang           |
| Jihai            |      | Tang           |
| Juntao           |      | Tang           |
| Lihong           |      | Tang           |
| Li-Juan          |      | Tang           |
| Lin              |      | Tang           |
| Long-Cheng       |      | Tang           |
| Qunwei           |      | Tang           |
| Ruikang          |      | Tang           |
| Tao              |      | Tang           |

|                |            |               |
|----------------|------------|---------------|
| WanJun         |            | Tang          |
| Xin-De         |            | Tang          |
| Yanli          |            | Tang          |
| Yawen          |            | Tang          |
| Yong-Jian      |            | Tang          |
| Yulin          |            | Tang          |
| Zhiyong        |            | Tang          |
| Shouchu        |            | Tang          |
| Jijun          |            | Tang          |
| Wan Si         |            | Tang          |
| Xu             |            | Tang          |
| Sheraz         | Ahmad Khan | Tanoli        |
| Ahmed          | Hamdy      | tantawy       |
| Dean           | J.         | Tantillo      |
| Chuanyi        |            | Tao           |
| Jun            |            | Tao           |
| Zhanliang      |            | Tao           |
| Peng           |            | Tao           |
| Oxana          |            | Taran         |
| Ljubica        |            | Tasic         |
| Hossein        |            | Tavakol       |
| Salah          | M.         | Tawfik        |
| Scott          | D.         | Taylor        |
| Kathryn        | M. L.      | Taylor-Pashow |
| Simone         | Agnes      | Techert       |
| Thomas         | S.         | Teets         |
| Mustafa        |            | Teke          |
| Joshua         |            | Telser        |
| Joseph         | L.         | Templeton     |
| Reshef         |            | Tenne         |
| Yoshikuni      |            | Teramoto      |
| Francisco      | J.         | Teran         |
| Leticia        |            | Terra         |
| Giancarlo      |            | Terraneo      |
| Nicholas       |            | Terret        |
| Igor           | V.         | Tetko         |
| Vijay Kumar    |            | Thakur        |
| Bhaskar        |            | Thallada      |
| Rangasamy      |            | Thangamuthu   |
| Jules          |            | Thibault      |
| Nicolas        |            | Thoma         |
| Jean-Sebastien |            | Thomann       |
| Anup           |            | Thomas        |
| K. R. Justin   |            | Thomas        |
| Sabu           |            | Thomas        |
| Eric           | J.         | Thomas        |
| David          | E.         | Thompson      |
| Kyle           |            | Thompson      |

|                  |            |                   |
|------------------|------------|-------------------|
| Ward             | H.         | Thompson          |
| Kaj              |            | Thomsen           |
| Regan            | J.         | Thomson           |
| Michael          | D.         | Threadgill        |
| Neetipalli       |            | Thrimurtulu       |
| Hirekodathakallu | V.         | Thulasiram        |
| He               |            | Tian              |
| Huafeng          |            | Tian              |
| Pengfei          |            | Tian              |
| Senlin           |            | Tian              |
| Wenjing          |            | Tian              |
| Zhixin           |            | Tian              |
| Haining          |            | Tian              |
| Jide             |            | Tian              |
| Jing-Hua         |            | Tian              |
| Edson            | A.         | Ticianelli        |
| Frederik         |            | Tielens           |
| Dominic          |            | Tildesley         |
| Joanna           |            | Timmins           |
| Maria            | Nikolaevna | Timofeeva         |
| Maria-Magdalena  |            | Titirici          |
| Durgesh Laxman   |            | Tiwari            |
| Rakesh           | Kumar      | Tiwari            |
| Stefano          |            | Tiziani           |
| Jose Luis        |            | Toca-Herrera      |
| Naoto            |            | Todoroki          |
| Masatoshi        |            | Tokita            |
| Kaoru            |            | Toko              |
| Dora             |            | Toledo Warshaviak |
| Bhushan          | J.         | Toley             |
| Praveen          | Kumar      | Tomar             |
| Yoichi           |            | Tominaga          |
| Keiichi          |            | Tomishige         |
| Nicholas         | C. O.      | Tomkinson         |
| Toshiyuki        |            | Tomoo             |
| Alan             | E.         | Tonelli           |
| Qing-Xiao        |            | Tong              |
| Yexiang          |            | Tong              |
| Ayben            |            | Top               |
| Hajime           |            | Torii             |
| Andrey           | Andreevich | Toropov           |
| F.               |            | Torricelli        |
| John             | P.         | Toscano           |
| John             | D.         | Tovar             |
| Patrick          | H.         | Toy               |
| Naoki            |            | Toyooka           |
| Ali              |            | Trabolsi          |
| Cyrille          |            | Train             |

|              |              |                     |
|--------------|--------------|---------------------|
| Julien       |              | Tranchida           |
| Miroslava    |              | Trchova             |
| Gregor       |              | Trefalt             |
| Mona         |              | Tréguer-Delapierre  |
| Brian        | G.           | Trewyn              |
| Antonio      |              | Tricoli             |
| Kumud        | Malika       | Tripathi            |
| Raphael      |              | Tripier             |
| Rajiv        |              | Trivedi             |
| Boris        | A.           | Trofimov            |
| Ludovic      |              | Troian-Gautier      |
| Tatiya       |              | Trongsatitkul       |
| Francois     |              | Trottein            |
| Donald       | G.           | Truhlar             |
| Anatoly      |              | Trukhin             |
| Anna M.      |              | Trzeciak            |
| Chih-Hung    |              | Tsai                |
| Anna         |              | Tsantili-Kakoulidou |
| Wei-Lung     |              | Tseng               |
| Zong-Liang   |              | Tseng               |
| Athanasios   | Constantinos | Tsipis              |
| Constantinos |              | Tsitsilianis        |
| Kousuke      |              | Tsuchiya            |
| Hiroshi      |              | Tsugawa             |
| Yoshihiro    |              | Tsujimoto           |
| Kaori        |              | Tsukakoshi          |
| Chihiro      |              | Tsukano             |
| Tatsuya      |              | Tsukuda             |
| Chia-Kuang   |              | Tsung               |
| Jun'ya       |              | Tsutsumi            |
| Jiangping    |              | Tu                  |
| Shu-Jiang    |              | Tu                  |
| Tao          |              | Tu                  |
| Xin          |              | Tu                  |
| Roman        |              | Tuma                |
| L.           | Nathan       | Tumey               |
| Sigitas      |              | Tumkevicius         |
| Dönüs        |              | Tuncel              |
| Burcu        |              | Tuncer              |
| Iñaki        |              | Tuñón               |
| Biing-Chiau  |              | Tzeng               |
| George       |              | Tzvetkov            |
| Hiroaki      |              | Uchiyama            |
| Susumu       |              | Uchiyama            |
| Yoshinori    |              | Uekusa              |
| Jesus        | M.           | Ugalde              |
| Ulrike       |              | Uhrig               |
| Daniela      |              | Uhrikova            |

|                   |             |                  |
|-------------------|-------------|------------------|
| Gregori           |             | Ujaque           |
| Bret              | D.          | Ulery            |
| Aman              |             | Ullah            |
| Matthias          | S.          | Ullrich          |
| Trond             |             | Ulven            |
| Kazuo             |             | Umemura          |
| Tomokazu          |             | Umeyama          |
| Saviour           | A.          | Umoren           |
| Halil Ibrahim     |             | Unal             |
| Tomonori          |             | Unno             |
| Miriam            | M.          | Unterlass        |
| Yasuyuki          |             | Ura              |
| Marek             | W.          | Urban            |
| Mustafa           |             | Urgen            |
| Esteban           | P.          | Urriolabeitia    |
| Yoshihide         |             | Usami            |
| Hiroshi           |             | Uyama            |
| Thomas            |             | Vad              |
| Saikiran          |             | Vadavalli        |
| Timothy           | D.          | Vaden            |
| Majid             |             | Vafaezadeh       |
| Stephen           | J.          | Valentine        |
| Luca              |             | Valentini        |
| Luca              |             | Valgimigli       |
| Suresh            |             | Valiyaveetil     |
| Siva              |             | Vallabhapurapu   |
| Markus            |             | Valtiner         |
| Mark              |             | Van der Auweraer |
| Arjan             |             | van der Vaart    |
| Steven            | R.          | Van Doren        |
| R.                |             | van Eldik        |
| Fijs              | W. B.       | van Leeuwen      |
| Veronique         |             | Van Speybroeck   |
| Dirk              |             | Vanderzande      |
| Sweta             |             | Vangaveti        |
| Kumar             |             | Vanka            |
| Yashwant          | D.          | Vankar           |
| Candida           |             | Vannini          |
| Brett             |             | VanVeller        |
| Luis Miguel       |             | Varela           |
| Antonio           |             | Vargas-Berenguel |
| P. R. Harikrishna |             | Varma            |
| Arvind            |             | Varma            |
| Rajender          | S.          | Varma            |
| Alexandre         |             | Varnek           |
| Rastko            |             | Vasilic          |
| Natasa            |             | Vasiljevic       |
| Aleksander        | Viktorovich | Vasilyev         |

|              |       |                  |
|--------------|-------|------------------|
| Nagamalai    |       | Vasimalai        |
| Jenel        |       | Vatamanu         |
| Timothy      | L.    | Vaughn           |
| G.           |       | Vázquez-Gómez    |
| Mário        |       | Vebber           |
| Andrei       | N.    | Vedernikov       |
| Aleksey      | A.    | Vedyagin         |
| Valdir       |       | Veiga            |
| Sergi        |       | Vela             |
| Javier       |       | Vela             |
| Luis         |       | Velarde          |
| Trinidad     |       | Velasco-Torrijos |
| Juan-Jesús   |       | Velasco-Vélez    |
| Praveen      | Kumar | Vemula           |
| Mariano      |       | Venanzi          |
| Mikhail      | V.    | Vener            |
| Dhandapani   |       | Venkataraman     |
| Krishnan     |       | Venkatasubbaiah  |
| Pannuru      |       | Venkatesu        |
| Bhanu        | P.    | Venkatesulu      |
| Arun         |       | Venkatnathan     |
| Jonathan     | L.    | Vennerstrom      |
| An           |       | Verberckmoes     |
| Willem       |       | Verboom          |
| Edgard       |       | Verdugo          |
| Akhilesh     | K.    | Verma            |
| Chandrabhan  |       | Verma            |
| Sandeep      |       | Verma            |
| Jan          |       | Vermant          |
| Robert       |       | Vianello         |
| Ardson       |       | Vianna Jr.       |
| Jose         | L.    | Vicario          |
| José Manuel  |       | Vicent-Luna      |
| Frederic     |       | Vidal            |
| Sebastien    |       | Vidal            |
| Anton        |       | Vidal-Ferran     |
| Kaido        |       | Viht             |
| Ramasamy     |       | Vijaya Anand     |
| Uthirapathy  |       | Vijayalakshmi    |
| K.           |       | Vijayamohanan    |
| Fernanda     |       | Vilela           |
| Fernando     |       | Villafañe        |
| Ajayan       |       | Vinu             |
| Ravikrishnan |       | Vinu             |
| Cesar        |       | Viseras          |
| Kodumudi     | S.    | Viswanathan      |
| Jose         |       | Vivo-Vilches     |
| Frédéric     |       | Vogel            |

|              |          |                |
|--------------|----------|----------------|
| Konstantinos | D.       | Vogiatzis      |
| Bryan        | D.       | Vogt           |
| Brigitte     |          | Voit           |
| Konstantin   | P.       | Volcho         |
| Georg        |          | von Freymann   |
| Stephan      |          | von Gunten     |
| Alexander    |          | von Kriegsheim |
| Igor         |          | Vorobyov       |
| Johannes     | Gerardus | Vos            |
| Tobias       |          | Vossmeier      |
| Mykhailo     |          | Vovk           |
| zisis        |          | vryzas         |
| Miomir       | B.       | Vukmirovic     |
| Valentine    | I.       | Vullev         |
| Hiroki       |          | Wadati         |
| Ayman Y.     |          | Waddad         |
| Jörg         |          | Wagler         |
| Brian        | Douglas  | Wagner         |
| Gerd         | K.       | Wagner         |
| Kazumasa     |          | Wakamatsu      |
| Atsushi      |          | Wakamiya       |
| Masahiro     |          | Wakao          |
| Masanobu     |          | Wakasa         |
| Yutaka       |          | Wakayama       |
| Toshiyuki    |          | Wakimoto       |
| Ivan         |          | Wall           |
| Karl         | J.       | Wallace        |
| Scott        | L.       | Wallen         |
| Zoë          | Ann Ella | Waller         |
| Charles      | John     | Walsby         |
| David        | R.       | Walt           |
| D. Eric      |          | Walters        |
| Michael      | A.       | Walters        |
| W. Patrick   |          | Walters        |
| Richard      | I.       | Walton         |
| Caichao      |          | Wan            |
| Decheng      |          | Wan            |
| Jie-Ping     |          | Wan            |
| Li-Jun       |          | Wan            |
| Xiaochun     |          | Wan            |
| Ying         |          | Wan            |
| Jian-Bo      |          | Wan            |
| Caixia       |          | Wan            |
| Adam         | K.       | Wanekaya       |
| Shaobin      |          | Wang           |
| Lisheng      |          | Wang           |
| Ai-Jun       |          | Wang           |
| Baiquan      |          | Wang           |



|            |  |      |
|------------|--|------|
| Baomin     |  | Wang |
| Bibo       |  | Wang |
| Bo         |  | Wang |
| Bo         |  | Wang |
| Changchun  |  | Wang |
| Chaozhan   |  | Wang |
| Chenyi     |  | Wang |
| Chong-Chen |  | Wang |
| Chungang   |  | Wang |
| Chunjie    |  | Wang |
| Chunming   |  | Wang |
| Congyang   |  | Wang |
| Dan        |  | Wang |
| Dan        |  | Wang |
| DanJun     |  | Wang |
| Dengke     |  | Wang |
| De-Xian    |  | Wang |
| Ning       |  | Wang |
| Dujin      |  | Wang |
| Fei        |  | Wang |
| Gang       |  | Wang |
| Gongkai    |  | Wang |
| Guang      |  | Wang |
| Guibin     |  | Wang |
| Gui-Gen    |  | Wang |
| Guowei     |  | Wang |
| Guoxiang   |  | Wang |
| Haihui     |  | Wang |
| Hanfu      |  | Wang |
| Honggen    |  | Wang |
| Hongyu     |  | Wang |
| Hongzhi    |  | Wang |
| Hua        |  | Wang |
| Huanlei    |  | Wang |
| Huiliang   |  | Wang |
| Jiacheng   |  | Wang |
| Jianbo     |  | Wang |
| Jian-guo   |  | Wang |
| Jianhui    |  | Wang |
| Jianjun    |  | Wang |
| Jian-rong  |  | Wang |
| Jifu       |  | Wang |
| Jijie      |  | Wang |
| Jing       |  | Wang |
| Jingyu     |  | Wang |
| Jinlan     |  | Wang |
| Jintao     |  | Wang |
| Jin-Ye     |  | Wang |

|            |  |      |
|------------|--|------|
| Kai-Xue    |  | Wang |
| Ke-Rang    |  | Wang |
| Ke-Zhi     |  | Wang |
| Kun        |  | Wang |
| Lei        |  | Wang |
| Leyong     |  | Wang |
| Li         |  | Wang |
| Liang      |  | Wang |
| Lianjun    |  | Wang |
| Limin      |  | Wang |
| Limin      |  | Wang |
| Ling       |  | Wang |
| Lingyun    |  | Wang |
| Lingzhi    |  | Wang |
| Liping     |  | Wang |
| Liyan      |  | Wang |
| Luying     |  | Wang |
| Meiyan     |  | Wang |
| Ming-Sheng |  | Wang |
| Minqiang   |  | Wang |
| Pengfei    |  | Wang |
| Pingli     |  | Wang |
| Qingxiang  |  | Wang |
| Quan       |  | Wang |
| Runwei     |  | Wang |
| Shu        |  | Wang |
| Shuai      |  | Wang |
| Shuangyin  |  | Wang |
| Shuao      |  | Wang |
| Shufang    |  | Wang |
| Shutao     |  | Wang |
| Sui-Dong   |  | Wang |
| Tianyu     |  | Wang |
| Wan-Hui    |  | Wang |
| Wei        |  | Wang |
| Wei        |  | Wang |
| Wencai     |  | Wang |
| Wenguang   |  | Wang |
| Wenzhong   |  | Wang |
| Xianfu     |  | Wang |
| Xiangke    |  | Wang |
| Xianhong   |  | Wang |
| Xianxiang  |  | Wang |
| Xiaobing   |  | Wang |
| Xiaodong   |  | Wang |

|               |  |      |
|---------------|--|------|
| Xiao-Ling     |  | Wang |
| Xiayan        |  | Wang |
| Xin           |  | Wang |
| Xin           |  | Wang |
| Xin           |  | Wang |
| Xinchen       |  | Wang |
| Xiu-Jun       |  | Wang |
| Xiu-Mei       |  | Wang |
| Xizhang       |  | Wang |
| Xuefeng       |  | Wang |
| Xuemei        |  | Wang |
| Xue-wei       |  | Wang |
| Yanling       |  | Wang |
| Yanqin        |  | Wang |
| Yaoming       |  | Wang |
| Ya-Wen        |  | Wang |
| Yilin         |  | Wang |
| Yin           |  | Wang |
| Yong          |  | Wang |
| Yong          |  | Wang |
| Yongqiang     |  | Wang |
| Yu            |  | Wang |
| Yun-hai       |  | Wang |
| Yu-Zhong      |  | Wang |
| Zhanhui       |  | Wang |
| Zhao-Xi       |  | Wang |
| Zhen-Bo       |  | Wang |
| Zhiming       |  | Wang |
| Zhiyong       |  | Wang |
| Zhonggang     |  | Wang |
| Zonghua       |  | Wang |
| Benxin        |  | Wang |
| Guichang      |  | Wang |
| Lixiang       |  | Wang |
| Mengye        |  | Wang |
| Yibo          |  | Wang |
| Yipeng        |  | Wang |
| Jianfang      |  | Wang |
| Wen-Xiong     |  | Wang |
| Long          |  | Wang |
| Shenghao      |  | Wang |
| Qimin         |  | Wang |
| Mingfeng      |  | Wang |
| Yusong        |  | Wang |
| Chyung-Chyung |  | Wang |
| Hui-Min       |  | Wang |
| Yu-Lin        |  | Wang |
| Yun-Ming      |  | Wang |

|           |    |              |
|-----------|----|--------------|
| Steven    |    | Wang         |
| Binghe    |    | Wang         |
| Dong      |    | Wang         |
| Gangli    |    | Wang         |
| Guijun    |    | Wang         |
| Hui       |    | Wang         |
| Jianmin   |    | Wang         |
| Jingjing  |    | Wang         |
| Jinwu     |    | Wang         |
| Ling      |    | Wang         |
| Lu        |    | Wang         |
| Mingsong  |    | Wang         |
| Qian      |    | Wang         |
| Qinze     |    | Wang         |
| Selina    | C. | Wang         |
| Shaopeng  |    | Wang         |
| Siqun     |    | Wang         |
| Tuo       |    | Wang         |
| Wei       |    | Wang         |
| Wei-Ning  |    | Wang         |
| Xue-Bin   |    | Wang         |
| Xuewei    |    | Wang         |
| Yin       |    | Wang         |
| Ying      |    | Wang         |
| Yongchen  |    | Wang         |
| Zeyan     |    | Wang         |
| Zhe       |    | Wang         |
| Zhong Lin |    | Wang         |
| Danling   |    | Wang         |
| Peipei    |    | Wang         |
| Qian      |    | Wang         |
| James     |    | Wang         |
| Valerie   |    | Ward         |
| Michael   | D. | Ward         |
| Richard   | A. | Ward         |
| Patrick   | A. | Ward         |
| Michael   |    | Wark         |
| Kailas    | L. | Wasewar      |
| Mark      |    | Wass         |
| Peter     |    | Wasserscheid |
| Ken       |    | Watanabe     |
| Masayuki  |    | Watanabe     |
| Adam      |    | Watras       |
| Hermann   |    | Wätzig       |
| Pamela    |    | Weathers     |
| Simon     | J. | Webb         |
| Bradley   |    | Webb         |
| Robert    | S. | Weber        |

|              |       |                  |
|--------------|-------|------------------|
| Eranthie     |       | Weerapana        |
| Rudolf       | Josef | Wehmschulte      |
| Bing         |       | Wei              |
| Dong-Qing    |       | Wei              |
| Guanghong    |       | Wei              |
| Jinquan      |       | Wei              |
| Liangming    |       | Wei              |
| Min          |       | Wei              |
| Qin          |       | Wei              |
| Qufu         |       | Wei              |
| W.           |       | Wei              |
| Wei          |       | Wei              |
| Wei          |       | Wei              |
| Wen-Ting     |       | Wei              |
| Xuetuan      |       | Wei              |
| Yingjin      |       | Wei              |
| Yuechang     |       | Wei              |
| Zheng        |       | Wei              |
| Qingshuo     |       | Wei              |
| Kung-Hwa     |       | Wei              |
| Guo-Wei      |       | Wei              |
| Tuo          |       | Wei              |
| Jeffrey D.   |       | Weidenhamer      |
| Tobias       |       | Weidner          |
| Tanja        |       | Weil             |
| Emily        | E.    | Weinert          |
| Susan        | T.    | Weintraub        |
| Richard      | G.    | Weiss            |
| Klaus        |       | Weisz            |
| Renate       | M. R. | Wellen           |
| James        |       | Wells            |
| Zhaoyin      |       | Wen              |
| Zhenhai      |       | Wen              |
| Yu-Chieh     |       | Wen              |
| Nial         | J.    | Wheate           |
| Ian          | M.    | White            |
| Timothy      | A.    | Whitehead        |
| Kenton       | H.    | Whitmire         |
| Luisa        |       | Whittaker-Brooks |
| Adrian       |       | Whitty           |
| Hans-Joachim |       | Wieden           |
| Diederik     | S.    | Wiersma          |
| Jonathan     | D.    | Wilden           |
| Christopher  | James | Wilds            |
| H. Martin    | R.    | Wilkening        |
| Francis      | S.    | Willard          |
| Gareth       | R.    | Williams         |
| Itamar       |       | Willner          |

|            |           |                   |
|------------|-----------|-------------------|
| Karen      |           | Wilson            |
| Lee        | D.        | Wilson            |
| William    | R.        | Wilson            |
| Stephen    | A.        | Winkle            |
| David      | A.        | Winkler           |
| Nicolas    |           | Winssinger        |
| Arthur     | H.        | Winter            |
| Charles    | H.        | Winter            |
| Bjorn      |           | Winther-Jensen    |
| Pernilla   |           | Wittung-Stafshede |
| Stanislaw  | F.        | Wnuk              |
| Keith      | A.        | Woerpel           |
| Robert     |           | Wojcieszak        |
| Stephan    | E.        | Wolf              |
| Peter      |           | Wolschann         |
| Keith      | Man-Chung | Wong              |
| Man-Kin    |           | Wong              |
| Chun-Yuen  |           | Wong              |
| Bryan      | M.        | Wong              |
| Jon        | W.        | Wong              |
| Nongnoot   |           | Wongkaew          |
| Thanyaporn |           | Wongnate          |
| Martyn     |           | Wood              |
| Martin     |           | Wortmann          |
| Marta      |           | Worzakowska       |
| Dennis     | L.        | Wright            |
| Aiguo      |           | Wu                |
| Changfeng  |           | Wu                |
| De-Cheng   |           | Wu                |
| De-Yin     |           | Wu                |
| Di         |           | Wu                |
| Dong       |           | Wu                |
| Fu-Gen     |           | Wu                |
| Guang      |           | Wu                |
| Guang-Peng |           | Wu                |
| Hui        |           | Wu                |
| Jiang      |           | Wu                |
| Jie        |           | Wu                |
| Limin      |           | Wu                |
| Lixin      |           | Wu                |
| Li-Zhu     |           | Wu                |
| Ming       |           | Wu                |
| Qiang      |           | Wu                |
| Ruibo      |           | Wu                |
| Shuizhu    |           | Wu                |
| Weize      |           | Wu                |
| Xiaochun   |           | Wu                |
| Xiaodong   |           | Wu                |

|             |    |         |
|-------------|----|---------|
| Xiaojun     |    | Wu      |
| Xing-Long   |    | Wu      |
| Xu          |    | Wu      |
| Xuemei      |    | Wu      |
| Yiping      |    | Wu      |
| Yonggang    |    | Wu      |
| Yuanfeng    |    | Wu      |
| Yu-Cheng    |    | Wu      |
| Yufeng      |    | Wu      |
| Yun-Dong    |    | Wu      |
| Yuping      |    | Wu      |
| Zhaoxin     |    | Wu      |
| Zhong-Shuai |    | Wu      |
| Zong-Quan   |    | Wu      |
| Xiao-Feng   |    | Wu      |
| Jie         |    | Wu      |
| Jishan      |    | Wu      |
| Ren-Jang    |    | Wu      |
| Shih-Hsiung |    | Wu      |
| Shu-Pao     |    | Wu      |
| Jimmy       |    | Wu      |
| Judy        | I. | Wu      |
| Li          |    | Wu      |
| Pin Chieh   |    | Wu      |
| Shin-Tson   |    | Wu      |
| Si          |    | Wu      |
| Haitao      |    | Wu      |
| Matthias    |    | Wuest   |
| William     | M. | Wuest   |
| Stefan      |    | Wuttke  |
| Aristotelis |    | Xenakis |
| Zhenhao     |    | Xi      |
| Kai         |    | Xi      |
| Da-Hai      |    | Xia     |
| Bing        |    | Xia     |
| Chungu      |    | Xia     |
| Hui         |    | Xia     |
| Meirong     |    | Xia     |
| Xi          |    | Xia     |
| Yan         |    | Xia     |
| Boayun      |    | Xia     |
| Dong        |    | Xiang   |
| Jun-Feng    |    | Xiang   |
| Weidong     |    | Xiang   |
| Huining     |    | Xiao    |
| Changfa     |    | Xiao    |
| Chong       |    | Xiao    |
| Dan         |    | Xiao    |

|           |  |        |
|-----------|--|--------|
| Rui       |  | Xiao   |
| Shuyuan   |  | Xiao   |
| Zewen     |  | Xiao   |
| Zihui     |  | Xiao   |
| Dequan    |  | Xiao   |
| Xingcheng |  | Xiao   |
| Huang     |  | Xiaoyu |
| Chao      |  | Xie    |
| Chenggen  |  | Xie    |
| Erqing    |  | Xie    |
| He-Lou    |  | Xie    |
| Jingying  |  | Xie    |
| Keyu      |  | Xie    |
| Tengfeng  |  | Xie    |
| Wenlei    |  | Xie    |
| Xiaojiang |  | Xie    |
| Xingang   |  | Xie    |
| Yixi      |  | Xie    |
| Yongmei   |  | Xie    |
| Zheng     |  | Xie    |
| Zhigang   |  | Xie    |
| Qingguang |  | Xie    |
| Jianping  |  | Xie    |
| Jijia     |  | Xie    |
| Mingjie   |  | Xie    |
| Lan       |  | Xie    |
| Feng      |  | Xin    |
| Sen       |  | Xin    |
| Gengmei   |  | Xing   |
| Wei       |  | Xing   |
| Xianran   |  | Xing   |
| Haolan    |  | Xu     |
| Bin       |  | Xu     |
| Bin       |  | Xu     |
| Chao      |  | Xu     |
| Chuanlai  |  | Xu     |
| Chunli    |  | Xu     |
| Dongyan   |  | Xu     |
| Feng      |  | Xu     |
| Fu-Jian   |  | Xu     |
| Guobao    |  | Xu     |
| Hai       |  | Xu     |
| Hangxun   |  | Xu     |
| Hong      |  | Xu     |
| Jing-Juan |  | Xu     |
| Jingkun   |  | Xu     |
| Lan       |  | Xu     |
| Liang     |  | Xu     |



|           |    |           |
|-----------|----|-----------|
| Liguang   |    | Xu        |
| Ping      |    | Xu        |
| Qing-Feng |    | Xu        |
| Shengming |    | Xu        |
| Shiai     |    | Xu        |
| Shuping   |    | Xu        |
| Tongwen   |    | Xu        |
| Wei       |    | Xu        |
| Wei       |    | Xu        |
| Weilin    |    | Xu        |
| Weiqing   |    | Xu        |
| Xinhua    |    | Xu        |
| Xinhua    |    | Xu        |
| Xinhua    |    | Xu        |
| Yi-Jun    |    | Xu        |
| Yinghua   |    | Xu        |
| Ying-Ming |    | Xu        |
| Yizhuang  |    | Xu        |
| Zhenming  |    | Xu        |
| Zhijun    |    | Xu        |
| Zhiping   |    | Xu        |
| Zhiwei    |    | Xu        |
| Zushun    |    | Xu        |
| Cheng-Ran |    | Xu        |
| Zhenglong |    | Xu        |
| Jianwei   |    | Xu        |
| Jun       |    | Xu        |
| Peng      |    | Xu        |
| Tao       |    | Xu        |
| Ya-Qiong  |    | Xu        |
| Miao      |    | Xu        |
| Pengchong |    | Xue       |
| Qingzhong |    | Xue       |
| Ying      |    | Xue       |
| Jay Kant  |    | Yadav     |
| Khushwant |    | Yadav     |
| Kevin     | G. | Yager     |
| Nazila    |    | Yaghini   |
| Anan      |    | Yaghmur   |
| Yusuke    |    | Yamada    |
| Eiji      |    | Yamaguchi |
| Takeo     |    | Yamaguchi |
| Hideki    |    | Yamaji    |
| Minoru    |    | Yamaji    |
| Yoko      |    | Yamakoshi |
| Vesselin  |    | Yamakov   |
| Tatsuyuki |    | Yamamoto  |
| Yohei     |    | Yamamoto  |

|          |  |            |
|----------|--|------------|
| Yohsuke  |  | Yamamoto   |
| Ichiro   |  | Yamanaka   |
| Junpei   |  | Yamanaka   |
| Kazuhiko |  | Yamasaki   |
| Hiromi   |  | Yamashita  |
| Yusuke   |  | Yamauchi   |
| Takanori |  | Yamawaki   |
| Suzuko   |  | Yamazaki   |
| Takashi  |  | Yamazaki   |
| Yuri     |  | Yampolskii |
| R.       |  | Yamuna     |
| Hongbin  |  | Yan        |
| Bing     |  | Yan        |
| Bing     |  | Yan        |
| Bing     |  | Yan        |
| Chao-Guo |  | Yan        |
| Dongpeng |  | Yan        |
| Fanyong  |  | Yan        |
| Fei      |  | Yan        |
| Feng     |  | Yan        |
| Ji       |  | Yan        |
| Jun      |  | Yan        |
| Kelu     |  | Yan        |
| Lifeng   |  | Yan        |
| Xiyun    |  | Yan        |
| Xuehai   |  | Yan        |
| Yu Li    |  | Yan        |
| Zifeng   |  | Yan        |
| Xiuling  |  | Yan        |
| Zhiping  |  | Yan        |
| Yanfa    |  | Yan        |
| Reiko    |  | Yanada     |
| Miho     |  | Yanagisawa |
| Claudia  |  | Yañez      |
| Chi      |  | Yang       |
| Bin      |  | Yang       |
| Bo       |  | Yang       |
| Chang-An |  | Yang       |
| Chao     |  | Yang       |
| Chuluo   |  | Yang       |
| Dong     |  | Yang       |
| Gang     |  | Yang       |
| Guwei    |  | Yang       |
| Hai-Bo   |  | Yang       |
| Hengquan |  | Yang       |
| Hongjun  |  | Yang       |
| Hua      |  | Yang       |
| Hua      |  | Yang       |

|            |  |      |
|------------|--|------|
| Huang-Hao  |  | Yang |
| Ji         |  | Yang |
| Jiakuan    |  | Yang |
| Jianxiao   |  | Yang |
| Jie        |  | Yang |
| Jin        |  | Yang |
| Jingyue    |  | Yang |
| Jinjun     |  | Yang |
| Jintao     |  | Yang |
| Juan       |  | Yang |
| Jucai      |  | Yang |
| Lan        |  | Yang |
| Lihua      |  | Yang |
| Li-Ming    |  | Yang |
| Peng       |  | Yang |
| Po         |  | Yang |
| Qing       |  | Yang |
| Quan-Hong  |  | Yang |
| Renqiang   |  | Yang |
| Ruizhi     |  | Yang |
| Shang-Dong |  | Yang |
| Shangfeng  |  | Yang |
| Sheng-Tao  |  | Yang |
| Songwang   |  | Yang |
| Tianzhong  |  | Yang |
| Wei        |  | Yang |
| Weiben     |  | Yang |
| Wenjun     |  | Yang |
| Wensheng   |  | Yang |
| Xiaodong   |  | Yang |
| Xiaogang   |  | Yang |
| Xiaoning   |  | Yang |
| Xinzheng   |  | Yang |
| Xue-Lin    |  | Yang |
| Yi         |  | Yang |
| Ying-Wei   |  | Yang |
| Zhen       |  | Yang |
| Zhenglong  |  | Yang |
| Zhi        |  | Yang |
| Nianjun    |  | Yang |
| Mo         |  | Yang |
| Hoichang   |  | Yang |
| Haifeng    |  | Yang |
| Haw        |  | Yang |
| Jialiang   |  | Yang |
| Jin        |  | Yang |
| Limin      |  | Yang |
| Sichun     |  | Yang |

|                |        |               |
|----------------|--------|---------------|
| Wanli          |        | Yang          |
| Xiaochuan      |        | Yang          |
| Xinghua        |        | Yang          |
| Yiqi           |        | Yang          |
| Zhaogang       |        | Yang          |
| Ei-Wen         |        | Yang          |
| Xianbin        |        | Yang          |
| Konstantina    |        | Yannakopoulou |
| Spyros         | N.     | Yannopoulos   |
| Jianxi         |        | Yao           |
| Juming         |        | Yao           |
| Wenqing        |        | Yao           |
| Qiaofeng       |        | Yao           |
| Makoto         |        | Yasuda        |
| Luis           |        | Yate          |
| Eylon          |        | Yavin         |
| Zhibin         |        | Ye            |
| Jun            |        | Ye            |
| Junwei         |        | Ye            |
| Lin            |        | Ye            |
| Liqun          |        | Ye            |
| Song           |        | Ye            |
| Yong           |        | Ye            |
| Shengfa        |        | Ye            |
| X.             | Philip | Ye            |
| Yong           |        | Ye            |
| Yin-Ting       |        | Yeh           |
| Kemal          |        | Yelekci       |
| Aswani         |        | Yella         |
| Yun            |        | Yen           |
| Feiyan         |        | Yi            |
| Shixiong       |        | Yi            |
| Tao            |        | Yi            |
| Yuanping       |        | Yi            |
| Guray          |        | Yildiz        |
| Mustafa        |        | Yildiz        |
| Abulimiti      |        | Yilii         |
| Hong           |        | Yin           |
| Caixia         |        | Yin           |
| Guochuan       |        | Yin           |
| Jun            |        | Yin           |
| Shouchun       |        | Yin           |
| Shuangfeng     |        | Yin           |
| Humphrey H. P. |        | Yiu           |
| Naoki          |        | Yokota        |
| Guoping        |        | Yong          |
| JIn            |        | Yong          |
| Dong Jin       |        | Yoo           |

|             |  |              |
|-------------|--|--------------|
| Sung Jong   |  | Yoo          |
| Jong Suk    |  | Yoo          |
| Ji-Ho       |  | Yoon         |
| Dae Sung    |  | Yoon         |
| Dong Ki     |  | Yoon         |
| Hyeonseok   |  | Yoon         |
| Juyoung     |  | Yoon         |
| Kyung Byung |  | Yoon         |
| Minyoung    |  | Yoon         |
| Myung-Han   |  | Yoon         |
| Jongseung   |  | Yoon         |
| Wataru      |  | Yoshida      |
| Yoichi      |  | Yoshida      |
| Naoko       |  | Yoshie       |
| Chiaki      |  | Yoshikawa    |
| Jingsong    |  | You          |
| Tingting    |  | You          |
| Reza        |  | Younesi      |
| Saeed       |  | Yousefinejad |
| Saleem      |  | Yousuf       |
| Yun         |  | Yu           |
| Aishui      |  | Yu           |
| Changlin    |  | Yu           |
| Guanghui    |  | Yu           |
| Gui         |  | Yu           |
| Haibin      |  | Yu           |
| Haibo       |  | Yu           |
| Hou-Yong    |  | Yu           |
| Jiaguo      |  | Yu           |
| Junsheng    |  | Yu           |
| Kai         |  | Yu           |
| Lin         |  | Yu           |
| Moxin       |  | Yu           |
| Ping        |  | Yu           |
| Ping        |  | Yu           |
| Qian        |  | Yu           |
| Qingsong    |  | Yu           |
| Senjiang    |  | Yu           |
| Shanshan    |  | Yu           |
| Wei         |  | Yu           |
| Wenquan     |  | Yu           |
| Xiaomin     |  | Yu           |
| Xiaoqi      |  | Yu           |
| Xiaoyuan    |  | Yu           |
| Xiqian      |  | Yu           |
| Ze          |  | Yu           |
| Zhengkun    |  | Yu           |
| Zhiqiang    |  | Yu           |

|             |           |           |
|-------------|-----------|-----------|
| Zhong-Zhen  |           | Yu        |
| Chol-Jun    |           | Yu        |
| Woo Jong    |           | Yu        |
| Guihua      |           | Yu        |
| Jian        |           | Yu        |
| William     | W.        | Yu        |
| Zhaoyang    |           | Yuan      |
| Haoliang    |           | Yuan      |
| Jianyu      |           | Yuan      |
| Jinying     |           | Yuan      |
| Quan        |           | Yuan      |
| Ruo         |           | Yuan      |
| Tong-Qi     |           | Yuan      |
| Yuwei       |           | Yuan      |
| Chengdong   |           | Yuan      |
| Meral       |           | Yuce      |
| Guanghui    |           | Yue       |
| Junpei      |           | Yue       |
| Wen         |           | Yue       |
| Dmitry      | S.        | Yufit     |
| Tatsuto     |           | Yui       |
| Miguel      |           | Yus       |
| Norazriena  |           | Yusoff    |
| Ulrich      |           | Zachariae |
| Sanjio      | S.        | Zade      |
| Payam       |           | Zahedi    |
| Abbasali    |           | Zamani    |
| Rodolfo     |           | Zanela    |
| Shuang-Quan |           | Zang      |
| Klaus       |           | Zangger   |
| Ronen       |           | Zangi     |
| Robertino   |           | Zanoni    |
| Richard     | N.        | Zare      |
| Aristides   | Dimitrios | Zdetsis   |
| Felix       |           | Zelder    |
| Alexander   | N.        | Zelikin   |
| Guangming   |           | Zeng      |
| Haibo       |           | Zeng      |
| Jian-Bing   |           | Zeng      |
| Jie         |           | Zeng      |
| Minfeng     |           | Zeng      |
| Qingdao     |           | Zeng      |
| Wei         |           | Zeng      |
| Xianhai     |           | Zeng      |
| Xiaoliang   |           | Zeng      |
| Zhixiang    |           | Zeng      |
| Oliver      |           | Zerbe     |
| Philipp     |           | Zerbe     |

|            |    |          |
|------------|----|----------|
| Dimitrios  | I. | Zeugolis |
| Hongbin    |    | Zhai     |
| Shang-Ru   |    | Zhai     |
| Changyou   |    | Zhan     |
| Chuanlang  |    | Zhan     |
| Jinhua     |    | Zhan     |
| Xiaowei    |    | Zhan     |
| Liyuan     |    | Zhang    |
| Jiujun     |    | Zhang    |
| Peng       |    | Zhang    |
| Xu         |    | Zhang    |
| Xuehua     |    | Zhang    |
| Rong-Zhen  |    | Zhang    |
| Bang-Le    |    | Zhang    |
| Bing       |    | Zhang    |
| Chang-Wen  |    | Zhang    |
| Chaoqun    |    | Zhang    |
| Chen-Xi    |    | Zhang    |
| Chi        |    | Zhang    |
| Chuang     |    | Zhang    |
| Chun-yang  |    | Zhang    |
| Dengsong   |    | Zhang    |
| Deqing     |    | Zhang    |
| Dongju     |    | Zhang    |
| Dongzhi    |    | Zhang    |
| Feng       |    | Zhang    |
| Feng       |    | Zhang    |
| Fujun      |    | Zhang    |
| Gaoke      |    | Zhang    |
| Guangcheng |    | Zhang    |
| Guanxin    |    | Zhang    |
| Guo-Jun    |    | Zhang    |
| Guoqing    |    | Zhang    |
| Guowen     |    | Zhang    |
| Hao-Bin    |    | Zhang    |
| Hongjie    |    | Zhang    |
| Hongyu     |    | Zhang    |
| Hui        |    | Zhang    |
| Jiahua     |    | Zhang    |
| Jian       |    | Zhang    |
| Jianhua    |    | Zhang    |
| Jianyong   |    | Zhang    |
| Jiawei     |    | Zhang    |
| Jin        |    | Zhang    |
| Jingdong   |    | Zhang    |
| Jinglai    |    | Zhang    |
| Jingyan    |    | Zhang    |
| Jinli      |    | Zhang    |

|            |  |       |
|------------|--|-------|
| Jiye       |  | Zhang |
| Juan       |  | Zhang |
| Jun        |  | Zhang |
| Junhao     |  | Zhang |
| Junjie     |  | Zhang |
| Junliang   |  | Zhang |
| Kaisong    |  | Zhang |
| Ke         |  | Zhang |
| Li         |  | Zhang |
| Li         |  | Zhang |
| Lian Ying  |  | Zhang |
| Lihong     |  | Zhang |
| Liqun      |  | Zhang |
| Na         |  | Zhang |
| Peisheng   |  | Zhang |
| Qiang      |  | Zhang |
| Qiao-Xin   |  | Zhang |
| Qilu       |  | Zhang |
| Quan-Ping  |  | Zhang |
| Ronghui    |  | zhang |
| Shaowei    |  | Zhang |
| Shengli    |  | Zhang |
| Shifeng    |  | Zhang |
| Shuai-nan  |  | Zhang |
| Shubiao    |  | Zhang |
| Song-Lin   |  | Zhang |
| Suojiang   |  | Zhang |
| Tierui     |  | Zhang |
| Wanbin     |  | Zhang |
| Wei        |  | Zhang |
| Xianxi     |  | Zhang |
| Xian-Zheng |  | Zhang |
| XiaoBing   |  | Zhang |
| Xiao-Dong  |  | Zhang |
| Xiaofei    |  | Zhang |
| Xiaogang   |  | Zhang |
| Xiaoyong   |  | Zhang |
| Xin-bo     |  | Zhang |
| Xingwang   |  | Zhang |
| Xiongf     |  | Zhang |
| Xitian     |  | Zhang |
| Xiuhui     |  | Zhang |
| Xu         |  | Zhang |
| Xuan       |  | Zhang |
| Yan        |  | Zhang |
| Yan        |  | Zhang |
| Yanfeng    |  | Zhang |
| Yao        |  | Zhang |



|           |    |       |
|-----------|----|-------|
| Yaping    |    | Zhang |
| Yi        |    | Zhang |
| Ying      |    | Zhang |
| Ying      |    | Zhang |
| Yingjia   |    | Zhang |
| Yong      |    | Zhang |
| Yong      |    | Zhang |
| Yongcai   |    | Zhang |
| Yongmin   |    | Zhang |
| Yongsheng |    | Zhang |
| Youyu     |    | Zhang |
| Yu        |    | Zhang |
| Yuhong    |    | Zhang |
| Yuxin     |    | Zhang |
| Zhan-Hui  |    | Zhang |
| Zhaoguo   |    | Zhang |
| Zhengjun  |    | Zhang |
| Zhenhua   |    | Zhang |
| Zhicheng  |    | Zhang |
| Zhi-Guo   |    | Zhang |
| Zhi-Ming  |    | Zhang |
| Zhongping |    | Zhang |
| Zi-Hui    |    | Zhang |
| Huiliang  |    | Zhang |
| Jiaolong  |    | Zhang |
| Peng      |    | Zhang |
| Xiaoxiang |    | Zhang |
| Xiaoyong  |    | Zhang |
| Gui-Rong  |    | Zhang |
| Huang     |    | Zhang |
| Biao      |    | Zhang |
| Hong-Jie  |    | Zhang |
| Hua       |    | Zhang |
| Qichun    |    | Zhang |
| Xia       |    | Zhang |
| Changlin  |    | Zhang |
| Fan       |    | Zhang |
| Guoqiang  |    | Zhang |
| Jian      |    | Zhang |
| Jin       | Z. | Zhang |
| Jingchao  |    | Zhang |
| Kai       |    | Zhang |
| Kehao     |    | Zhang |
| Leili     |    | Zhang |
| Li        |    | Zhang |
| Lifeng    |    | Zhang |
| Sheng     | S. | Zhang |
| Shiran    |    | Zhang |

|            |  |       |
|------------|--|-------|
| Xiang      |  | Zhang |
| Xiaolu     |  | Zhang |
| Xin        |  | Zhang |
| Yanjie     |  | Zhang |
| Zhenbin    |  | Zhang |
| Yitao      |  | Zhang |
| Xin Bo     |  | Zhang |
| Shuaifei   |  | Zhao  |
| Yuming     |  | Zhao  |
| Changsheng |  | Zhao  |
| Fenglan    |  | Zhao  |
| Gang       |  | Zhao  |
| Haichao    |  | Zhao  |
| Hong-Wu    |  | Zhao  |
| Jijun      |  | Zhao  |
| Jingxiang  |  | Zhao  |
| Jiupeng    |  | Zhao  |
| Junjie     |  | Zhao  |
| Kun        |  | Zhao  |
| Li-Dong    |  | Zhao  |
| Meiping    |  | Zhao  |
| Mei-Xin    |  | Zhao  |
| Pei        |  | Zhao  |
| Qian       |  | Zhao  |
| Qiang      |  | Zhao  |
| Qing       |  | Zhao  |
| Shifeng    |  | Zhao  |
| Xia        |  | Zhao  |
| Xiao-Jun   |  | Zhao  |
| Xingzhong  |  | Zhao  |
| Yafei      |  | Zhao  |
| Yong       |  | Zhao  |
| Yuanchun   |  | Zhao  |
| Yuan-Di    |  | Zhao  |
| Yunfeng    |  | Zhao  |
| Zhenxia    |  | Zhao  |
| Zhijuan    |  | Zhao  |
| Zhongkui   |  | Zhao  |
| Zongbin    |  | Zhao  |
| Zujin      |  | Zhao  |
| Chang-Guo  |  | Zhao  |
| Mengyun    |  | Zhao  |
| Xipo       |  | Zhao  |
| Jing       |  | Zhao  |
| Linlin     |  | Zhao  |
| Yonggang   |  | Zhen  |
| Gang       |  | Zheng |
| Baozhan    |  | Zheng |

|                |  |         |
|----------------|--|---------|
| Fangcai        |  | Zheng   |
| Gaofeng        |  | Zheng   |
| Haoquan        |  | Zheng   |
| He-Gen         |  | Zheng   |
| Jian           |  | Zheng   |
| Li             |  | Zheng   |
| Maojun         |  | Zheng   |
| Nan            |  | Zheng   |
| Shiyou         |  | Zheng   |
| Shourong       |  | Zheng   |
| Wei-Jun        |  | Zheng   |
| Weitao         |  | Zheng   |
| Xinghua        |  | Zheng   |
| Yan-Zhen       |  | Zheng   |
| Youxuan        |  | Zheng   |
| Yu-Ming        |  | Zheng   |
| Guo            |  | Zheng   |
| Alexander      |  | Zheng   |
| Jinyun         |  | Zheng   |
| Qifeng         |  | Zheng   |
| Yuebing        |  | Zheng   |
| Zilong         |  | Zheng   |
| Chunyi         |  | Zhi     |
| Hui            |  | Zhi     |
| Konstantin Yu. |  | Zhizhin |
| Hai-Zheng      |  | Zhong   |
| Junbo          |  | Zhong   |
| Liangshu       |  | Zhong   |
| Yu-Wu          |  | Zhong   |
| Zhaoping       |  | Zhong   |
| Ziyi           |  | Zhong   |
| Wenwan         |  | Zhong   |
| Baoxue         |  | Zhou    |
| Cairong        |  | Zhou    |
| Guowei         |  | Zhou    |
| Hongjian       |  | Zhou    |
| Jia-Hai        |  | Zhou    |
| Jian           |  | Zhou    |
| Jinping        |  | Zhou    |
| Kebin          |  | Zhou    |
| Keqing         |  | Zhou    |
| Li             |  | Zhou    |
| Lincheng       |  | Zhou    |
| Lixing         |  | Zhou    |
| Mingfei        |  | Zhou    |
| Qunfang        |  | Zhou    |
| Renxian        |  | Zhou    |
| Shuyun         |  | Zhou    |

|            |  |      |
|------------|--|------|
| Si         |  | Zhou |
| Wei        |  | Zhou |
| Weijia     |  | Zhou |
| Weiyou     |  | Zhou |
| Xiang      |  | Zhou |
| Xiangge    |  | Zhou |
| Xiaohong   |  | Zhou |
| XinHui     |  | Zhou |
| Yang       |  | Zhou |
| Yanmei     |  | Zhou |
| Ying-Lin   |  | Zhou |
| Yong       |  | Zhou |
| Yonghong   |  | Zhou |
| Zhen       |  | Zhou |
| Zhenghong  |  | Zhou |
| Zhengzhong |  | Zhou |
| Zhi-You    |  | Zhou |
| Zhongzhen  |  | Zhou |
| Bingpu     |  | Zhou |
| Guangmin   |  | Zhou |
| Jia        |  | Zhou |
| Min        |  | Zhou |
| Wei        |  | Zhou |
| Xiaobing   |  | Zhou |
| Ai-Min     |  | Zhu  |
| Baoku      |  | Zhu  |
| Hongjun    |  | Zhu  |
| Jian       |  | Zhu  |
| Jun        |  | Zhu  |
| Junjiang   |  | Zhu  |
| Linna      |  | Zhu  |
| Manzhou    |  | Zhu  |
| Mingqiang  |  | Zhu  |
| Mingshan   |  | Zhu  |
| Shanhui    |  | Zhu  |
| Wei-Hong   |  | Zhu  |
| Xiaozhang  |  | Zhu  |
| Xinyuan    |  | Zhu  |
| Yanwu      |  | Zhu  |
| Yongfa     |  | Zhu  |
| Yongfeng   |  | Zhu  |
| Yong-Ming  |  | Zhu  |
| Yufang     |  | Zhu  |
| Zhi        |  | Zhu  |
| Zhirong    |  | Zhu  |
| Zi-Zhong   |  | Zhu  |
| Guangshan  |  | Zhu  |
| Zonglong   |  | Zhu  |

|             |    |                |
|-------------|----|----------------|
| Ye          |    | Zhu            |
| Dongxia     |    | Zhu            |
| Jie         | S. | Zhu            |
| Junyong     |    | Zhu            |
| Xiuping     |    | Zhu            |
| Shulin      |    | Zhuang         |
| Wei         |    | Zhuang         |
| Weidong     |    | Zhuang         |
| Xiaodong    |    | Zhuang         |
| Guofu       |    | Zi             |
| Majda       |    | Zigon          |
| Nico        |    | Zinn           |
| Hendrik     |    | Zipse          |
| Robert      | W. | Zoellner       |
| Nasrin      |    | Zohreh         |
| Mohammad    | J. | Zohuriaan-Mehr |
| Brian       | D. | Zoltowski      |
| Bingsuo     |    | Zou            |
| Changjun    |    | Zou            |
| Daifeng     |    | Zou            |
| Guifu       |    | Zou            |
| Hong-Bin    |    | Zou            |
| Ji-Jun      |    | Zou            |
| Quan        |    | Zou            |
| Taotao      |    | Zou            |
| Xiaoxin     |    | Zou            |
| Yingping    |    | Zou            |
| Yue         |    | Zou            |
| Ferenc      |    | Zsila          |
| Lei         |    | Zu             |
| Liansuo     |    | Zu             |
| Mohammad    |    | Zuber          |
| Daniele     |    | Zuccaccia      |
| Weiran      |    | Zuo            |
| Jing-Lin    |    | Zuo            |
| Xiaolei     |    | Zuo            |
| Hans-Conrad |    | zur Loye       |
| Grigory     | V. | Zyryanov       |
| Marek       |    | Żywicki        |
